# Supplementary material for: Theoretical investigation of nucleophilic substitution reaction of phenyl carbonyl isothiocyanates with pyridines in gas and polar aprotic solvent
Source: Royal Society of Chemistry journal article supplement (doi:10.1039/d3cp04272c), 2024-01-01
Supplement: d3cp04272c1.pdf [file d3cp04272c1.pdf]

*Supplementary Information*

**Theoretical Investigation of Nucleophilic Substitution Reaction of Phenyl Carbonyl Isothiocyanates with Pyridines in Gas and Polar Aprotic Solvent**

Keshab Kumar Adhikary<sup>a,\*</sup>, Francis Verpoort<sup>b,c</sup>, Philippe M. Heynderickx<sup>a,d,\*</sup>

<sup>a</sup> Center for Environmental and Energy Research (CEER) – Engineering of Materials via Catalysis and Characterization, Ghent University Global Campus, 119-5 Songdomunhwa-Ro, Yeonsu-Gu, Incheon, 406-840 South Korea

<sup>b</sup> Laboratory of Organometallics, Catalysis and Ordered Materials, State Key Laboratory of Advanced Technology for Materials Synthesis and Processing, Wuhan University of Technology, Wuhan 430070, P.R. China

<sup>c</sup> National Research Tomsk Polytechnic University, Lenin Avenue 30, 634050 Tomsk, Russian Federation

<sup>d</sup> Department of Green Chemistry and Technology, Faculty of Bioscience Engineering, Ghent University, Coupure Links 653, Ghent, B-9000, Belgium

\* Corresponding author: [Keshab.Adhikary@Ghent.ac.kr](mailto:Keshab.Adhikary@Ghent.ac.kr), [Philippe.Heynderickx@Ghent.ac.kr](mailto:Philippe.Heynderickx@Ghent.ac.kr)

**Abstract:**

The current study focuses on the mutual interaction of substituents in the nucleophile and substrate – cross interaction constant,  $\rho_{XY}$ , in the uncatalyzed aminolysis by substituting pyridine with phenyl carbonyl isothiocyanate. A stepwise reaction mechanism considers the Cross-Interaction Constant (CIC) with rate limiting break down of tetrahedral intermediate in gas and solvent phase. The Hammett coefficient with X,  $\rho_X$  (–1.93 to –6.54 for the gas phase and 10.5 to 18.9 in the solvent model), with Y,  $\rho_Y$  (0.41 – 3.48 for the gas phase and 1.83 ~ –10.70 for solvent model), Brönsted coefficient with X,  $\beta_X$  (0.11 – 1.52 for gas phase and –2.57 – 3.96 for solvent model), cross interaction constant (CIC),  $\rho_{XY}$  (0.69 for gas phase and 0.87 for solvent model). NBO analysis, reaction potential, reaction electronic flux (REF), dual descriptor, and the structure-energy relationships were considered to interpret the mechanistic criteria. The mechanism was proposed as a stepwise process with a rate-limiting breakdown of the –NCS leaving group.

## List of Contents

|                                                                |               |
|----------------------------------------------------------------|---------------|
| Title and Abstract .....                                       | Page 0        |
| Contents .....                                                 | Page 1        |
| Bond Perturbation ( $\Delta d$ ) .....                         | Page 2        |
| Pauling's Bond Valence-Bond Length Empirical Correlation ..... | Page 3        |
| NBO Charges .....                                              | Page 4        |
| Table ST1 .....                                                | Page 6        |
| Table ST2a .....                                               | Page 8        |
| Table ST2b .....                                               | Page 9        |
| Table ST3a.....                                                | Page 10       |
| Table ST3b .....                                               | Page 12       |
| Table ST4 .....                                                | Page 13       |
| Table ST4a .....                                               | Page 13       |
| Table ST5a .....                                               | Page 14       |
| Table ST5b .....                                               | Page 15       |
| Table ST6 .....                                                | Page 16       |
| Table ST6a .....                                               | Page 16       |
| Table ST7 .....                                                | Page 17       |
| Table ST7a .....                                               | Page 17       |
| Table ST7b .....                                               | Page 18       |
| Table ST8a .....                                               | Page 20       |
| Table ST8b .....                                               | Page 21       |
| Figure SF1a .....                                              | Page 8        |
| Figure SF1b .....                                              | Page 9        |
| Figure SF2 .....                                               | Page 10       |
| Figure SF3a .....                                              | Page 11       |
| Figure SF3b .....                                              | Page 11       |
| Figure SF4 .....                                               | Page 12       |
| Figure SF5a .....                                              | Page 22       |
| Figure SF6a .....                                              | Page 22       |
| Figure SF5b .....                                              | Page 23       |
| Figure SF6b .....                                              | Page 23       |
| Figure SF7a .....                                              | Page 24       |
| Figure SF7b .....                                              | Page 24       |
| Figure SF8 .....                                               | Page 25       |
| Reactant Geometry (Gas Phase) .....                            | Page 26 – 31  |
| Gas Phase TSs .....                                            | Page 32 – 67  |
| Reactant Geometry (Solvent Phase) .....                        | Page 68 – 73  |
| Solvent Phase TSs .....                                        | Page 74 – 109 |

### Bond Perturbation ( $\Delta d$ ):

As the type of substrate and nucleophile affect the bonding behavior of a specific system, the bond perturbation technique addresses the tuned combined correlation of resonance or field effect of the corresponding substituents into the corresponding TS. In this respect, it is essential to recognize and understand the factors responsible for governing the chemical reactivity of a specific system. In the present work, the bond formation via interaction of substituted pyridine nucleophile and the breaking of the leaving group, isothiocyanate ( $-NCS$ ), are greatly affected by the Y-substituent of the phenoxy non-leaving group. In the TS series, the relative bond length variations ( $\Delta d$ ) for  $C_1 - Nu$  ( $\Delta d_{C_1 - Nu}$ ),  $C_1 = O_2$  ( $\Delta d_{C=O}$ ),  $C_1 - N_L$  ( $\Delta d_{C_1 - N_L}$ ), and  $C_1 - O_3$  ( $\Delta d_{C_1 - O_3}$ ) are summarized in **Table ST2b** for Y-substituents' variation in the gas phase and in **Table ST3a** for X-substituents' variation in the continuum solvent model. The reported value is generated from the difference in bond order between the substituted and unsubstituted reactant entity ( $XY = 33$ ). The data for the relevant X and Y substituents' variation for the gas and solvent phases is summarized in **Tables ST2a** and **ST3b**; **Fig. SF1a, b** and **SF4** in SI.

Specifically, the  $\Delta d$  bond length perturbation values, the differences of  $XY = 31$  to  $36$  and  $XY = 33$  (**Table ST2b**) for the gas phase or  $XY = 13$  to  $63$  and  $XY = 33$  (**Table ST3a**) for the solution phase are displayed. The data in **Table ST2b** shows a good correlation between the perturbation values  $\Delta d$  (in Å) and the Hammett substituent constants for different Y substituents. Since the intrinsic thermodynamic properties are directly related to the bond perturbations<sup>1</sup>, the slope, sign, and magnitude indicate the efficacious group's (substituent) participation in the TS. The specific value of the correlation coefficient  $r^2$  represents in-line electronic transmissions or other detrimental factors involved in the transition state for physical reorganization. Negative slopes indicate direct incremental electronic transmission effects, whereas positive values are for relaxing. In **Table ST2b**, all the bond perturbations, such as for  $C_1 - Nu$ ,  $C_1 - O_3$ ,  $C_1 = O_2$ , and  $C_1 - N_L$  are nicely correlated ( $r^2 = 0.95 - 0.97$ ) with the variation of phen-ring Y substituent constants ( $\delta\sigma_Y$ ), means direct electronic transmissions are effective. The smaller magnitude of correlation values for  $C_1 - O_3$  (0.009) and  $C_1 = O_2$  (-0.003) indicate smaller effects or transmission balanced between phen-ring and the carbonyl moiety, and the balance resulted in the relative propagation of pydn-ring and electronic perturbation of the weak leaving group  $-NCS$ . On the other hand, the somewhat larger correlation for  $C_1 - Nu$  (slope =  $-0.030$ ,  $r^2 = 0.945$ ) and  $C_1 - N_L$  (slope =  $0.055$ ,  $r^2 = 0.965$  respectively (**Table ST2b**, **Figure SF2**) indicates the direct electronic transmission towards reaction center  $C_1$  (negative value) and withdrawal (positive value). Conversely, in the case of the Hammett substituent constants for the nucleophilic variation ( $\delta\sigma_X < |0| < \delta\sigma_X$ ) in the gas phase, a positive magnitude of the slope (0.022) for  $C_1 - Nu$  bond perturbation is observed. This indicates the gradual obstruction of mutual charge transmission to the TS by gradual weaker interaction with the reaction center with a fair correlation coefficient,  $r^2 = 0.949$  (**Table ST2a**, **Figure SF1a** in SI).

For  $C_1 - O_3$ , and  $C_1 = O_2$  and  $C_1 - N_L$ , poor correlation coefficients with small values were obtained for the slopes ( $-0.009$ ,  $r^2 = 0.687$ ;  $-0.003$ ,  $r^2 = 0.738$ ; and  $0.003$ ,  $r^2 = 0.015$ , respectively) for nucleophilic variation in the gas phase. **Table ST2a** and **Figure SF1a** show the detrimental charge and inductive effect to the reaction moiety by the protection to cleavage of the  $C_1 - N_L$  bond. Interestingly, the departure of the leaving group strongly depends on the nucleophilic parity and the phen-ring participations. On the same reaction center, later phen-ring perturbation enhanced the  $C_1 - N_L$  bond cleavage with the nucleophile's interaction at the carbonyl moiety. Hence, it can be expected that the TS is positioned closer to the product on the reaction coordinate, giving the late TS with a product-like structure in the gas phase.

The negative slope ( $-0.005$ ,  $r^2 = 0.958$ ) for the  $C_1 - Nu$  restricted bond formation with a gradual lower basicity of nucleophiles in the TS, applying  $pK_a(X)$  values, is strong evidence for the steric congestion regarding these nucleophiles. The very small negative value ( $-0.002$ ,  $r^2 = 0.069$ ) in the gas phase for the  $C_1 - N_L$  bond also indicates a very small transferring effective charge to perturb the leaving group and an ineffective group participation and, hence, restricts departure of the leaving group.

The nature of the changes is somewhat different in the solution model (**Table ST3a**, **Figure SF3a**), producing a gradual longer  $C_1 - N_L$  bond lengths in the TS from strongly basic to weakly basic nucleophiles. The slope regarding the Hammett substituent constant is large positive (0.053), which corresponds to a gradual enhancement of bond

breaking. On the other hand, sizeable positive  $C_1 - Nu$  bond saturation values indicate spontaneous close interaction of nucleophiles. Similarly, a considerable negative value for the slope ( $-0.011$ , see **Table ST3a** and **Figure SF3b**) is obtained, applying a Brønsted acid-base coefficient of the substituents in pyridine nucleophiles, where reasonable correlation coefficients between 0.848 and 0.904 were obtained.

A striking observation is the inefficiency of the leaving group ( $-NCS$ ) in the gas phase unlikely to be the polarized solvent continuum model concerning the nucleophilic variation. The high positive slope (0.053,  $r^2=0.848$ ) indicates a large extent of  $C_1 - N_L$  bond cleavage in the solvent model concerning the weakly basic nucleophiles.  $C_1 - O_3$  and  $C_1 = O_2$  actively enhance the leaving group departure with corresponding slopes  $-0.019$  and  $-0.008$  with good correlation coefficients. In the solvent phase, the bond perturbation behavior is mainly similar to the gas phase for the Y-substitution variation, except for the poor correlation coefficient (0.358) in the  $C_1 - O_3$  bond (**Table ST3b** and **Figure SF4**). This result indicates that the phen-ring loses the electronic communication towards the leaving group via reaction center  $C_1$  with gradual lower basicity, probably due to the solvent polarity effects. In this respect, the retardation of the reaction rate is ascribed to the electrostatic and intramolecular H-bonding effects.

#### Reference:

1. Kubelka, J.; Bickelhaupt, F. M. Activation Strain Analysis of  $S_N2$  Reactions at C, N, O, and F Centers. *J. Phys. Chem. A* **2017**, *121* (4), 885–891. <https://doi.org/10.1021/acs.jpca.6b12240>.

#### Pauling's Bond Valence-Bond Length Empirical Correlation:

We intended to find the valence length correlation using Pauling's bond valence-bond length empirical parameters<sup>1</sup> expressed in Eq. (14), where  $s$  is the bond softness or bond valence or bond order, and  $R_0$  is the standard bond order:

$$s = \exp\left(\frac{R_0 - R}{b}\right) \quad (14)$$

Interestingly, this Pauling's bond softness  $s$  is a good indicator for destabilizing or stabilizing the reaction center.

It can be noted that the bond length in the TS when  $XY = 33$  considers as  $R_0$  and  $R$  are the respective bonds of the TS with X and Y variations. The empirical fitting parameter  $b$  is often associated with the softness of the bond. In practice, experimental<sup>2</sup> values for  $b$  have been reported as 0.25 to 0.55 Å. Due to the limited results, this value is often assumed to be a universal constant of 0.37 Å. Using Eq. (14), the valence length coefficients ( $s$ ) were calculated and are summarized in **Table ST4** and **ST4a** for the gas phase and **Table ST6** and **ST6a** for the solution model. In addition, we considered the  $C_1 - O_2$  single bond instead of  $C=O$  due to the examination of transition state behavior.

The Pauling's bond valence-bond length,  $s$ , for a Y-substituent's variation from an electron donor (ED) to electron-withdrawing (EW) substituents change ( $\delta\sigma_Y \geq 0 \geq \delta\sigma_Y$ ) for gas, and the solvent model shows a decreasing  $C_1 - Nu$  but increasing  $C_1 - N_L$  bond softness. The observation is common for the nucleophilic substitution at the carbonyl moiety: the increasing trend for the  $C_1 - O_3$  destabilizes the reaction center, but conversely stabilizes the TS, and the decreasing trend of the  $C_1 = O_2$  bond softness stabilizes the reaction center. Weakly basic phen-ring facilitates the  $C_1 - N_L$  bond cleavage, where nucleophilic charge transmission pushes forward the departure of the leaving group.

In the case of gas-phase nucleophilic substituent's variation (**Table ST4**) from stronger basic to weaker ( $\delta\sigma_X \geq 0 \geq \delta\sigma_X$ ), the bond softness for  $C_1 - Nu$  is gradually increasing, but for  $C_1 - N_L$ , it increases for 4-MeO pyridine to 3-Cl ( $\delta\sigma_X \geq 0$ ) and gradually decreases for 3-Cl pyridine to 4-CN pyridine, ( $\delta\sigma_X \geq 0$ ). The 3-Cl pyridine acquired the maximum magnitude (1.037). This observation suggested that stronger nucleophiles interacted within the closest proximity in advance by forming a very tight TS. On the other hand, weaker nucleophiles produce a long-distance

weaker interaction where  $C_1 - N_L$  leaving group departure was restricted, e.g.,  $s_{(C_1 - N_L)}$  of 53 and 63 are 0.971 and 0.967, respectively. At this specific point  $C_1 - O_3$  and  $C_1 = O_2$  moieties play a vital as well as surprising role in TS tightness by employing remarkable shunt effects through the  $C_1$  reaction center during the stronger and weaker nucleophilic attack. The proposed scenario can be adequately rationalized with the interaction of similar bond softness for the overall process with XY = 11, 22, 33, 44, 55, and 66, respectively, in SI (**Table ST4a**). Except for  $C_1 = O_2$  and  $C_1 - N_L$ , where  $C_1 = O_2$  and  $C_1 - O_3$  apply the shunt effect, the  $C_1 - N_L$  bond cleavage is facilitated by the nucleophilic charge transmission.

Conversely, in the solvent model for the nucleophilic (X) substitution variation from stronger to weaker nucleophiles, the bond softness  $s_{(C_1 - Nu)}$  and  $s_{(C_1 - N_L)}$  shows the same trend. The respective values display an increasing trend representing a gradual loosening of the TS. This suggests that the TS is destabilized by the shunt effect during the stronger nucleophiles, whereas it is stabilized by the weaker ones. The phenomenon influences the advanced nucleophilic attack with the formation of a very tight TS with the action of stronger nucleophiles. The structural features (see **Table ST5a** and **b** in SI) indicate that two cyclic structures (**Figure 4** in the manuscript) are present, having five- and six-centered H-bonds. These scenarios are also valid for the gas phase model. The respective  $C_1 - N_L$  bond lengths gradually decreased to 1.868, 1.844, and 1.842 or 1.808, 1.798, and 1.812 Å respectively for 3-Cl, 4-Ac, and 4-CN pyridines in the gas phase and the solvent model respectively. The corresponding H-bonds were bounded in 2.765 Å or less. The observations indicate the electronic shunting effects between the carbonyl bond and the phen-ring environment. The reflection indicates extra stability to the transitional moments during the weaker nucleophilic interaction in the solvent model. The reason is an advanced nucleophilic attack leaving an  $N^+$  nucleophile residue behind as a tetrahedral zwitterion intermediate (**T<sup>±</sup>** in the manuscript). In the solvent model, the behavior is reasonably different mainly due to the solvent polarization, which controls the shunt effect, which is equally reflected in the bond softness for the XY = 11, 22, 33, 44, 55, 66 in the solvent model (see **ST6a** in SI).

#### References:

1. F. D. Hardcastle. Valence-Length Correlations for Chemical Bonds from Atomic Orbital Exponents. *J. Ark. Acad. Sci.* **2013**, 67 (11), 53–58.
2. F. D. Hardcastle. A General Valence-Length Correlation for Determining Bond Orders: Application to Carbon-Carbon and Carbon-Hydrogen Chemical Bonds. *J. Ark. Acad. Sci.* **2016**, Vol. 70, Article 17. (Article 17), 96–101.

#### NBO Charges:

A summary of the natural bond order charges (NBO charge), natural valence electron population (VPOP), Wiberg bond index (WBI), the bonding coefficients (BC), and the respective dipole moment (DM) of the TS in gas and solvent continuum models is displayed in **Table ST7** (also **ST7a** and **b**).

In the case of VPOP, carbonyl oxygen ( $O_2$ ), nucleophilic nitrogen (Nu), and phenylic oxygen ( $O_3$ ) showed the enriched orbitals for the electron-donating substituents (X and Y) for both the gas and the solvent model and gradually decrease with the decreasing donating nature of the substituents. Carbonyl carbon ( $C_1$ ) reaction center is populated during the strong donor and strong withdrawer nature of the substituents (X, Y) in the gas phase. However, in the solvent model, the orbital population is gradually decreasing with the substituents' decreasing ability to donate. Leaving nitrogen ( $N_L$ ) shows the increasing population with the variation of the nucleophilic substituents (X) from donating to withdrawing for the solvent model, whereas the population is similar for stronger to the weaker donor for the gas phase; i.e., consistent with the observation of bond softness. We can assume the pictorial representation of the charge density lobes in **Figure 5** (in the manuscript).

NBO charges on carbonyl oxygen ( $O_2$ ), nucleophilic nitrogen (Nu), and phen-ring oxygen ( $O_3$ ), show a gradually decreasing trend from electron-donating to electron-withdrawing series of substituents (X and Y) in the gas and solvent phase, respectively. This trend indicates the intersection route characteristics of the charge mobilization through the system's carbon reaction center ( $C_1$ ). In the gas phase, the positive charge on the carbon reaction center,  $C_1$ , decreases for strong electron donor and withdrawer (X,Y) substituents; alternatively, the accumulation of negative charges increases, whereas in the solvent model, the amount of positive charge gradually increases with the decreasing electron donor power of the substituents. The EW nature of the Y-substituents affects the hybridization nature of the reaction center ( $C_1$ ) in the solvent phase, tending to go from  $sp^2$  to  $sp^3$  by pushing ability by  $\sigma$ -inductive effects, resulting in a TS destabilization. On the other hand, the electronic charge on the leaving group's nitrogen ( $N_L$ ) is mostly stable in the gas phase but is increasing in the solvent model. The positive charge accumulation in the  $C_1$  reaction center and the negative charge centered on the  $N_L$  leaving nitrogen have a parallel nature where the strong donor and the weaker donor substituents play roles assertively, which indicates the rate-determining step change from formation to breakdown of the TS depending on the substituent's variation. Also in the gas phase, the charge flow towards the leaving group's nitrogen ( $N_L$ ) is obstructed by creating a charge circulatory zone (shunt effect) between the reaction center, carbonyl group ( $C=O$ ), and phen-ring. In the solvent model, the positive charge in the  $C_1$  reaction center and the negative charge accumulation in the leaving nitrogen  $N_L$  gradually increase with the substituents' decreasing donor ability. The process reports the spontaneous charge separation by breaking the TS, probably due to the polarization function by ion-dipole interactions. This observation reflects in the dipole moment (DM) parameter in **Table ST7**, where the DM is higher in magnitude in the solvent model, and the gas phase is rather low and gradually decreases with the substituents' decreasing donor ability.

In the solvent model, the Wiberg bond index (WBI),  $C_1 - Nu$  bond is much higher, reflecting the advanced and stronger nucleophilic interactions.  $C_1 - O_2$  WBI increases with decreasing donating ability of the substituents in the gas, and the solvent model is the general observation for the substitution process. That is opening the resonance and charge transfer function between the reaction center and the leaving group of the TS by providing the  $sp^2$  hybridization characteristic of the  $C_1$  reaction center. Moreover,  $C_1 - Nu$  and the  $C_1 - N_L$  bond index is not consistent with each other. That indicates charge delocalization takes place. In this regard, H-bonds with the phenyl ring ( $H_{ph}$ ) and the pyridine moiety ( $H_{nu}$ ) can be considered. Where, control is situated to form and break the TS i.e. substituted phenyl moiety plays the role for mechanistic criteria.  $C_1 - O_3$  WBI is lower for the stronger and the weaker donor in the gas phase. Again, the indexes are gradually rising in the solvent model. The process indicates spontaneity in the solvent model. However, the gas phase represents a competition of opening charge transformation through phen-ring to activate the departure of the leaving group depending on the substituents' variation.

**Table ST1.** The comparison of mechanistic pathways for the experimental results with the current computational work is based on Hammett and Brönsted reaction parameters.

| System                                                                   | N <sub>u</sub> | $\rho_X$ and $\beta_X$                                                                      | $\rho_Y$ or $\rho_Z$            | $\rho_{XY}$                      | Mechanism                          | Ref.         |
|--------------------------------------------------------------------------|----------------|---------------------------------------------------------------------------------------------|---------------------------------|----------------------------------|------------------------------------|--------------|
| YC <sub>6</sub> H <sub>4</sub> NHC(O)CH <sub>2</sub> Br                  | BnA            | 0.55 – 1.38<br>0.71 – 1.70                                                                  | 0.72 – -0.31                    | 0.16<br>-1.51                    | Stepwise<br>Concerted              | 1            |
| YC <sub>6</sub> H <sub>4</sub> N(CH <sub>3</sub> )C(O)CH <sub>2</sub> Br | BnA            | -0.27 – -1.75<br>0.50 – 3.23<br>-0.45 – -1.65<br>0.45 – 1.65                                | 0.10 – 0.71                     | -0.32, -1.80<br><br>-0.22, -1.43 | Concerted<br><br>Concerted         | 2            |
| YC <sub>6</sub> H <sub>4</sub> NRC(O)CH <sub>2</sub> Cl                  | Pyn            | R=H:<br>-1.49 – -1.58<br>0.30 – 0.32<br>R=CH <sub>3</sub><br>-1.48 – -1.60<br>0.30 – 0.32   | 0.22 – 0.24<br><br>0.23 – 0.40  | -0.06<br><br>-0.10               | Stepwise:<br>E-Ad<br><br>Concerted | 3            |
| YC <sub>6</sub> H <sub>4</sub> NRC(O)CH <sub>2</sub> Cl                  | BnA            | R=H:<br>-0.43 – -0.66<br>0.50 – 0.87<br>R=CH <sub>3</sub> :<br>-0.47 – -0.68<br>0.61 – 0.87 | 0.49 – 0.65<br><br>0.54 – 0.67  | 0.21<br><br>0.18                 | Stepwise<br><br>Stepwise           | 4            |
| CH <sub>3</sub> C(S)SC <sub>6</sub> H <sub>4</sub> Z                     | Pyn            | -1.71 – -1.78<br>0.37 – 0.39<br>-4.68 – -5.29<br>0.83 – 0.94                                | 2.34 – 3.22                     | -0.15<br><br>1.34                | Concerted<br><br>Stepwise          | 5            |
| C <sub>4</sub> H <sub>3</sub> OC(S)SC <sub>6</sub> H <sub>4</sub> Z      | pyn            | -0.70 – -0.77<br>0.16 – 0.17<br>-3.68 – -4.09<br>0.73 – 0.81                                | 0.97 – 1.60                     | -0.11<br><br>0.86                | Concerted<br><br>Stepwise          | 6            |
| YC <sub>6</sub> H <sub>4</sub> O(EtO)P(O)Cl                              | pyn            | -5.45 – 6.70<br>0.87 – 1.07                                                                 | 1.79 – -3.82<br>-1.78 – 3.10    | -6.26<br>-5.47                   | Concerted<br>Concerted             | 7            |
| YC <sub>6</sub> H <sub>4</sub> OC(O)NCS                                  | pyn            | Gas:<br>-1.93 – -6.54<br>0.11 – 1.52<br>Sol:<br>10.5 – 18.9<br>-2.57 – -3.96                | 0.87 – 3.48<br><br>1.83 – -10.7 | 0.69<br><br>0.87                 | Stepwise<br><br>Stepwise           | This<br>Work |

## References

- (1) Keshab Kumar Adhikary; Hai Whang Lee. Nucleophilic Substitution Reactions of N-Methyl  $\alpha$ -Bromoacetanilides with Benzylamines in Dimethyl Sulfoxide. *Bull Korean Chem Soc* **2011**, 32 (3), 857–862. <https://doi.org/10.5012/bkcs.2011.32.3.857>.
- (2) Oh, H. K.; Ku, M. H.; Lee, H. W.; Lee, I. Kinetics and Mechanism of the Pyridinolysis of Aryl Furan-2-Carbodithioates in Acetonitrile. *J. Org. Chem.* **2002**, 67 (25), 8995–8998. <https://doi.org/10.1021/jo0264269>.

(3) Keshab Kumar Adhikary; Chan Kyung Kim; Bon-Su Lee; Hai Whang Lee. Nucleophilic Substitution Reactions of  $\alpha$ -Bromoacetanilides with Benzylamines. *Bull Korean Chem Soc.* **2008**, 29 (1), 191–196. <https://doi.org/10.5012/bkcs.2008.29.1.191>.

(4) Shuchismita Dey; Keshab Kumar Adhikary; Chan Kyung Kim; Bon-Su Lee; Hai Whang Lee. Nucleophilic Substitution Reactions of  $\alpha$ -Chloroacetanilides with Pyridines in Dimethyl Sulfoxide. *Bull Korean Chem Soc.* **2005**, 26 (5), 776–780. <https://doi.org/10.5012/bkcs.2005.26.5.776>.

(5) Oh, H. K.; Ku, M. H.; Lee, H. W.; Lee, I. Nucleophilic Substitution Reactions of Aryl Dithioacetates with Pyridines in Acetonitrile. *J. Org. Chem.* **2002**, 67 (11), 3874–3877. <https://doi.org/10.1021/jo025637a>.

(6) Lee, K. S.; Adhikary, K. K.; Lee, H. W.; Lee, B.-S.; Lee, I. Nucleophilic Substitution Reactions of  $\alpha$ -Chloroacetanilides with Benzylamines in Dimethyl Sulfoxide. *Org. Biomol. Chem.* **2003**, 1 (11), 1989–1994. <https://doi.org/10.1039/B300477E>.

(7) Dyson, P. J.; Jessop, P. G. Solvent Effects in Catalysis: Rational Improvements of Catalysts via Manipulation of Solvent Interactions. *Catal. Sci. Technol.* **2016**, 6 (10), 3302–3316. <https://doi.org/10.1039/C5CY02197A>.



**Table ST2a.** The correlation of relative bond-length variations (bond perturbation,  $\Delta d$ , in Å) with respect to unsubstituted reactant and nucleophile with the X-variations for the reactions of unsubstituted phenyl carbonyl isothiocyanates with X-pyridines in the gas phase.

| BL Diff with 33                           | in TS for X3                 |
|-------------------------------------------|------------------------------|------------------------------|------------------------------|------------------------------|
| ${}^a\sigma_X$                            | $\Delta_{C1-Nu} \times 10^2$ | $\Delta_{C1-O3} \times 10^2$ | $\Delta_{C1=O2} \times 10^2$ | $\Delta_{C1-NL} \times 10^2$ |
| -0.27                                     | 1.069                        | -0.549                       | -0.250                       | 1.552                        |
| -0.17                                     | 0.490                        | -0.273                       | -0.091                       | 0.668                        |
| 0                                         | 0                            | 0                            | 0                            | 0                            |
| 0.37                                      | -0.691                       | 0.520                        | 0.157                        | -1.332                       |
| 0.50                                      | -0.646                       | 0.002                        | 0.078                        | 1.090                        |
| 0.66                                      | -1.327                       | 0.407                        | 0.090                        | 1.243                        |
| <b>Slope</b>                              | <b>0.023±0.02</b>            | <b>0.009±0.001</b>           | <b>-0.003±0.001</b>          | <b>-0.003±0.006</b>          |
| $r^2$                                     | 0.949                        | 0.687                        | 0.738                        | 0.015                        |
| <b>Slope (pK<sub>a</sub>)<sup>a</sup></b> | <b>0.005±0.02</b>            | <b>-0.002±0.009</b>          | <b>-0.001±0.003</b>          | <b>0.002±0.001</b>           |
| $r^2$                                     | 0.958                        | 0.841                        | 0.784                        | 0.069                        |

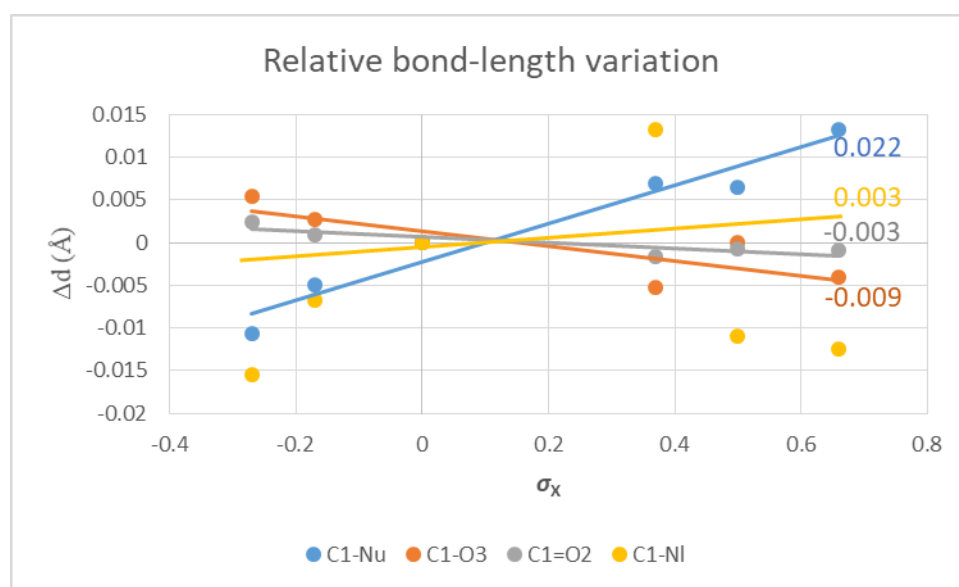

**Figure SF1a.** Correlation diagram of the relative bond-length variations ( $\Delta d$ , in Å) with respect to unsubstituted substrate and nucleophile ( $XY=33$ ) with the variation of the substituents constants of the nucleophiles for the reactions of phenyl carbonyl isothiocyanate with X-pyridines in gas model (see Table ST2a) where, (●), (●), (●), and (●) represent the  $C_1 - N_u$ ,  $C_1 - O_3$ ,  $C_1 = O_2$ , and  $C_1 - N_L$  with X variations respectively.

**Table ST2b:** The correlation of relative bond-length variations (bond perturbation,  $\Delta_d$ , in Å) with respect to unsubstituted reactant and nucleophile with the Y-variations for the reactions of substituted phenyl carbonyl isothiocyanates with pyridine in the gas phase.

| BL Diff with 33 | in TS for 3Y                 |
|-----------------|------------------------------|------------------------------|------------------------------|------------------------------|
| $\sigma_Y$      | $\Delta_{C1-Nu} \times 10^2$ | $\Delta_{C1-O3} \times 10^2$ | $\Delta_{C1=O2} \times 10^2$ | $\Delta_{C1-NL} \times 10^2$ |
| -0.27           | 0.681                        | -0.164                       | 0.111                        | -1.657                       |
| -0.17           | 0.397                        | -0.086                       | 0.047                        | -0.855                       |
| 0               | 0                            | 0                            | 0                            | 0                            |
| 0.12            | 0.124                        | 0.034                        | -0.036                       | -0.168                       |
| 0.23            | -0.772                       | 0.253                        | -0.025                       | 0.881                        |
| 0.66            | -2.095                       | 0.636                        | -0.156                       | 3.688                        |
| <b>Slope</b>    | <b>-0.030±0.0001</b>         | <b>-0.009±0.0003</b>         | <b>0.003±0.0002</b>          | <b>0.055±0.002</b>           |
| $r^2$           | 0.945                        | 0.965                        | 0.955                        | 0.965                        |

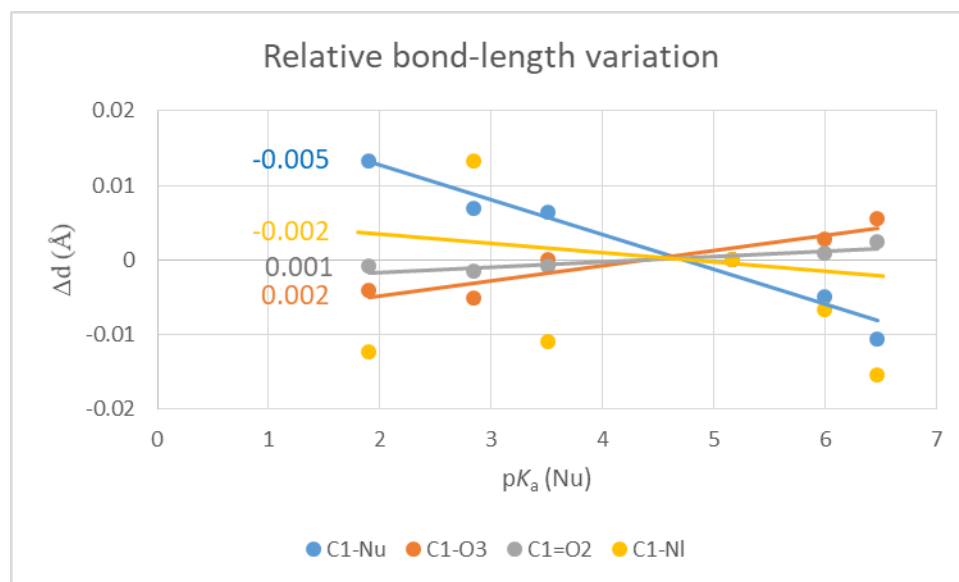

**Figure SF1b.** Correlation diagram of the relative bond-length variations ( $\Delta_d$ , in Å) with respect to unsubstituted substrate and nucleophile with the variation of nucleophilic  $pK_a$  values ( $pK_a$  values are available in Table 7 or Table 8 of the main article) for the reactions of phenyl carbonyl isothiocyanate with X-pyridines in gas-phase model where, (●), (●), (●), (●) represent the  $C_1 - N_u$ ,  $C_1 - O_3$ ,  $C_1 = O_2$ , and  $C_1 - N_L$  with X variations respectively.

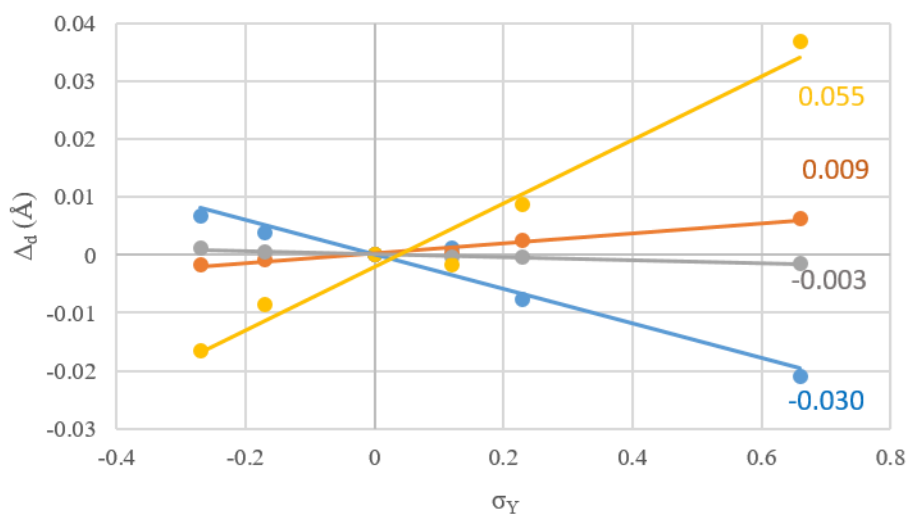

**Figure SF2:** Correlation diagram of the relative bond-length variations ( $\Delta_d$ , in Å) with respect to unsubstituted reactant and nucleophile and the variation for Y-substituents constants for the reaction of substituted phenyl carbonyl isothiocyanates with pyridine in the gas phase (see Table ST2b), where (●), (●), (●), and (●) represents the  $C_1 - N_u$ ,  $C_1 - O_3$ ,  $C_1 = O_2$ , and  $C_1 - N_L$  with Y-variation, respectively.

**Table ST3a:** The correlation of relative bond-length variations (bond perturbation,  $\Delta_d$ , in Å) with respect to unsubstituted reactant and nucleophile with the nucleophilic variation for the phenyl carbonyl isothiocyanate with X-pyridines in continuum solvent model.

| BL Diff with 33                | in TS for X3                  | in TS for X3                   | in TS for X3                   | in TS for X3                  |
|--------------------------------|-------------------------------|--------------------------------|--------------------------------|-------------------------------|
| $^a \sigma_X$                  | $\Delta_{C_1-Nu} \times 10^2$ | $\Delta_{C_1-O_3} \times 10^2$ | $\Delta_{C_1=O_2} \times 10^2$ | $\Delta_{C_1-NL} \times 10^2$ |
| -0.27                          | -1.215                        | 1.088                          | 0.451                          | -3.495                        |
| -0.17                          | -0.546                        | 0.535                          | 0.218                          | -1.812                        |
| 0                              | 0                             | 0                              | 0                              | 0                             |
| 0.37                           | 0.806                         | -0.638                         | -0.290                         | 1.772                         |
| 0.50                           | 0.593                         | -0.424                         | -0.149                         | 0.750                         |
| 0.66                           | 1.167                         | -0.987                         | -0.342                         | 2.225                         |
| <b>Slope</b>                   | <b>0.023±0.003</b>            | <b>-0.019±0.003</b>            | <b>-0.008±0.001</b>            | <b>0.053±0.011</b>            |
| $r^2$                          | 0.919                         | 0.908                          | 0.870                          | 0.848                         |
| <b>Slope (pKa)<sup>a</sup></b> | <b>-0.005±0.022</b>           | <b>0.004±0.02</b>              | <b>0.002±0.007</b>             | <b>-0.011±0.05</b>            |
| $r^2$                          | 0.947                         | 0.944                          | 0.924                          | 0.904                         |

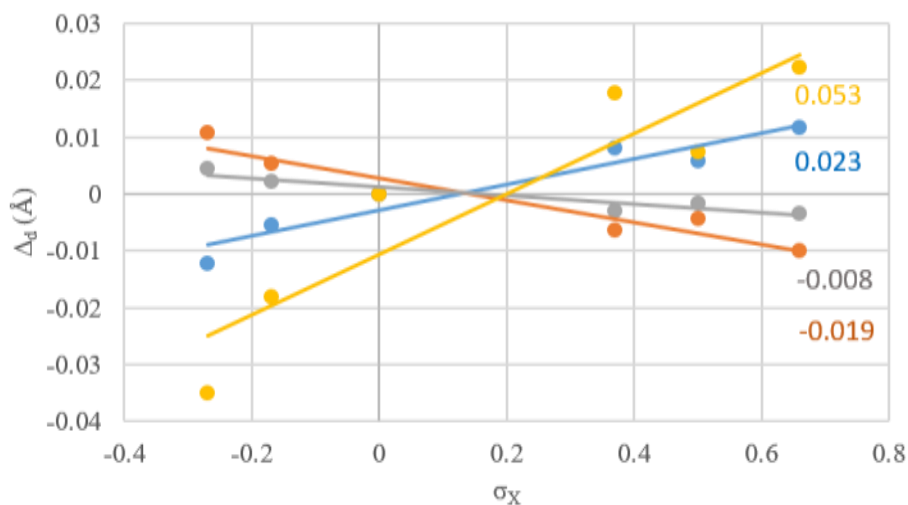

**Figure SF3a:** Correlation diagram of the relative bond-length variations ( $\Delta_d$ , in Å) with respect to unsubstituted substrate and nucleophile (XY=33) with the variation of the substituents constants of the nucleophiles for the reactions of phenyl carbonyl isothiocyanate with X-pyridines in continuum solvent model (see Table), where (●), (●), (●), and (●) represent the  $C_1 - N_u$ ,  $C_1 - O_3$ ,  $C_1 = O_2$ , and  $C_1 - N_L$  with X variations, respectively.

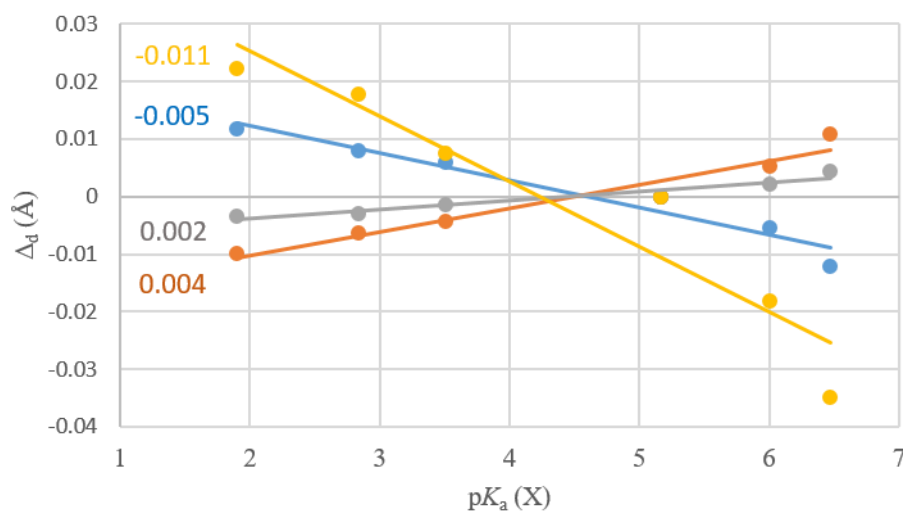

**Figure SF3b:** Correlation diagram of the relative bond-length variations ( $\Delta_d$ , in Å) with respect to unsubstituted reactant and nucleophile with the variation of nucleophilic  $pK_a$  values ( $pK_a$  values are available in Error! Reference source not found. and Error! Reference source not found.) for the reactions of phenyl carbonyl isothiocyanate with X-pyridines in continuum solvent model (see Table), where (●), (●), (●), and (●) represent the  $C_1 - N_u$ ,  $C_1 - O_3$ ,  $C_1 = O_2$ , and  $C_1 - N_L$  with X variations, respectively.

**Table ST3b.** The correlation of relative bond-length variations (bond perturbation,  $\Delta d$ , in Å) with respect to unsubstituted reactant and nucleophile with the Y-variations for the reactions of substituted phenyl carbonyl isothiocyanates with pyridine in the solvent phase.

| BL Diff with 33 | in TS for 3Y                 |
|-----------------|------------------------------|------------------------------|------------------------------|------------------------------|
| $\sigma_Y$      | $\Delta_{C1-Nu} \times 10^2$ | $\Delta_{C1-O3} \times 10^2$ | $\Delta_{C1=O2} \times 10^2$ | $\Delta_{C1-NL} \times 10^2$ |
| -0.27           | 0.512                        | -0.164                       | 0.172                        | -1.377                       |
| -0.17           | 0.318                        | -0.090                       | 0.089                        | -0.821                       |
| 0               | 0                            | 0                            | 0                            | 0                            |
| 0.12            | 0.042                        | 0.029                        | -0.032                       | 0.077                        |
| 0.23            | -1.513                       | 1.179                        | -0.298                       | 3.056                        |
| 0.66            | -1.550                       | 0.560                        | -0.395                       | 3.845                        |
| <b>Slope</b>    | <b>-0.025±0.002</b>          | <b>0.010±0.002</b>           | <b>-0.006±0.0002</b>         | <b>0.060±0.002</b>           |
| $r^2$           | 0.792                        | 0.420                        | 0.902                        | 0.868                        |

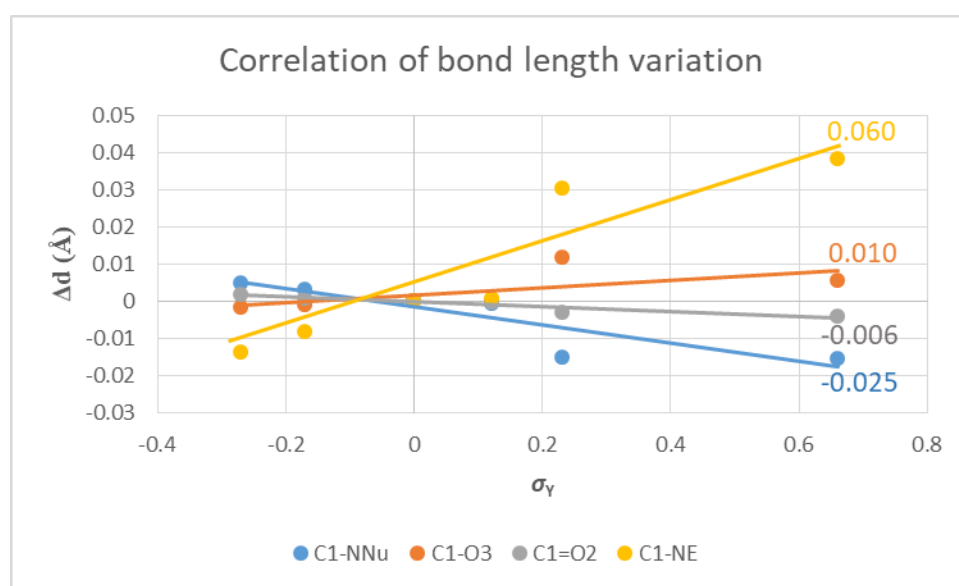

**Figure SF4.** Correlation diagram of the relative bond-length variations ( $\Delta d$ , in Å) with respect to unsubstituted reactant and nucleophile and the variation for Y-substituents constants for the reaction of substituted phenyl carbonyl isothiocyanates with pyridine in the solvent phase (Table ST1b) where, (●), (●), (●), and (●) represents the  $C_1 - N_u$ ,  $C_1 - O_3$ ,  $C_1 = O_2$ , and  $C_1 - N_L$  with Y-variation respectively.

**Table ST4.** The bond valence length coefficients ( $s$ ) are calculated for some specific system of the nucleophilic substitution reaction between Y-phenyl carbonyl isothiocyanates and X-pyridines in gas phase.

| $\sigma_X$ | Species    | $C_1-N_{Nu}$ | $C_1-O_{NL}$ | $C_1=O_2$ | $C_1-N_L$ | 33-X3      | $dC_1-N_{nu}$ | $dC_1-O_{NL}$ | $dC_1=O_2$ | $dC_1-N_L$ | V-length | $VLC_1-N_{Nu}$ | $VLC_1-O_{NL}$ | $VLC_1=O_2$ | $VLC_1-N_L$ |
|------------|------------|--------------|--------------|-----------|-----------|------------|---------------|---------------|------------|------------|----------|----------------|----------------|-------------|-------------|
| -0.27      | tsfD13     | 1.56199      | 1.37692      | 1.20733   | 1.8391    |            | 0.01069       | -0.00549      | -0.0025    | 0.01552    |          | 0.971521       | 1.014948       | 1.00678     | 0.958922    |
| -0.17      | tsfD23     | 1.56778      | 1.37416      | 1.20574   | 1.84794   |            | 0.0049        | -0.00273      | -0.00091   | 0.00668    |          | 0.986844       | 1.007406       | 1.002462    | 0.982108    |
| 0          | tsfD33     | 1.57268      | 1.37143      | 1.20483   | 1.85462   |            | 0             | 0             | 0          | 0          |          | 1              | 1              | 1           | 1           |
| 0.37       | tsfD43     | 1.57959      | 1.36623      | 1.20326   | 1.86794   |            | -0.00691      | 0.0052        | 0.00157    | -0.01332   |          | 1.018851       | 0.986044       | 0.995766    | 1.036656    |
| 0.5        | tsfD53     | 1.57914      | 1.37145      | 1.20405   | 1.84372   |            | -0.00646      | -2E-05        | 0.00078    | 0.0109     |          | 1.017613       | 1.000054       | 0.997894    | 0.97097     |
| 0.66       | tsfD63     | 1.58595      | 1.36736      | 1.20393   | 1.84219   |            | -0.01327      | 0.00407       | 0.0009     | 0.01243    |          | 1.036516       | 0.98906        | 0.997571    | 0.966963    |
|            |            |              |              |           |           |            |               |               |            |            |          |                |                |             |             |
|            |            |              |              |           |           |            |               |               |            |            |          |                |                |             |             |
| $\sigma_Y$ | Species    | $C_1-N_{Nu}$ | $C_1-O_{NL}$ | $C_1=O_2$ | $C_1-N_L$ | 33-3Y      | $dC_1-N_{nu}$ | $dC_1-O_{NL}$ | $dC_1=O_2$ | $dC_1-N_L$ | V-length | $VLC_1-N_{Nu}$ | $VLC_1-O_{NL}$ | $VLC_1=O_2$ | $VLC_1-N_L$ |
| -0.27      | tsfD31     | 1.57949      | 1.36979      | 1.20594   | 1.83805   |            | -0.00681      | 0.00164       | -0.00111   | 0.01657    |          | 1.018576       | 0.995577       | 1.003005    | 0.956204    |
| -0.17      | tsfD32     | 1.57665      | 1.37057      | 1.2053    | 1.84607   |            | -0.00397      | 0.00086       | -0.00047   | 0.00855    |          | 1.010787       | 0.997678       | 1.001271    | 0.977157    |
| 0          | tsfD33     | 1.57268      | 1.37143      | 1.20483   | 1.85462   |            | 0             | 0             | 0          | 0          |          | 1              | 1              | 1           | 1           |
| 0.12       | tsfD34     | 1.57392      | 1.37177      | 1.20447   | 1.85294   |            | -0.00124      | -0.00034      | 0.00036    | 0.00168    |          | 1.003357       | 1.000919       | 0.999028    | 0.99547     |
| 0.23       | tsfD35     | 1.56496      | 1.37396      | 1.20458   | 1.86343   |            | 0.00772       | -0.00253      | 0.00025    | -0.00881   |          | 0.979351       | 1.006861       | 0.999325    | 1.024097    |
| 0.66       | tsfD36     | 1.55173      | 1.37779      | 1.20327   | 1.8915    |            | 0.02095       | -0.00636      | 0.00156    | -0.03688   |          | 0.944952       | 1.017338       | 0.995793    | 1.104813    |
|            |            |              |              |           |           |            |               |               |            |            |          |                |                |             |             |
| $\sigma_X$ | $\sigma_Y$ | $C_1-N_{Nu}$ | $C_1-O_{NL}$ | $C_1=O_2$ | $C_1-N_L$ | 33-XY(X=Y) | $dC_1-N_{nu}$ | $dC_1-O_{NL}$ | $dC_1=O_2$ | $dC_1-N_L$ | V-length | $VLC_1-N_{Nu}$ | $VLC_1-O_{NL}$ | $VLC_1=O_2$ | $VLC_1-N_L$ |
| -0.27      | -0.27      | tsfD11       | 1.56858      | 1.37524   | 1.20878   | 1.82143    | 0.0041        | -0.00381      | -0.00395   | 0.03319    |          | 0.98898        | 1.01035        | 1.010733    | 0.914203    |
| -0.17      | -0.17      | tsfD22       | 1.57135      | 1.37304   | 1.20621   | 1.84114    | 0.00133       | -0.00161      | -0.00138   | 0.01348    |          | 0.996412       | 1.004361       | 1.003737    | 0.964223    |
| 0          | 0          | tsfD33       | 1.57268      | 1.37143   | 1.20483   | 1.85462    | 0             | 0             | 0          | 0          |          | 1              | 1              | 1           | 1           |
| 0.37       | 0.12       | tsfD44       | 1.56415      | 1.37506   | 1.21223   | 1.81221    | 0.00853       | -0.00363      | -0.0074    | 0.04241    |          | 0.97721        | 1.009859       | 1.020201    | 0.891703    |
| 0.5        | 0.23       | tsfD55       | 1.57065      | 1.3739    | 1.20403   | 1.85229    | 0.00203       | -0.00247      | 0.0008     | 0.00233    |          | 0.994529       | 1.006698       | 0.99784     | 0.993722    |
| 0.66       | 0.66       | tsfD66       | 1.5631       | 1.37483   | 1.20284   | 1.87178    | 0.00958       | -0.0034       | 0.00199    | -0.01716   |          | 0.97444        | 1.009232       | 0.994636    | 1.047471    |

**Table ST4a:** The bond valence length coefficients ( $s$ ) are calculated for some specific systems of the nucleophilic substitution reaction between Y-phenyl carbonyl isothiocyanates and X-pyridines in gas phase.

| System | $s C_1-N_{Nu}$ | $s C_1-O_3$ | $s C_1=O_2$ | $s C_1-N_L$ | System | $s C_1-N_{Nu}$ | $s C_1-O_3$ | $s C_1=O_2$ | $s C_1-N_L$ |
|--------|----------------|-------------|-------------|-------------|--------|----------------|-------------|-------------|-------------|
| 31     | 1.019          | 0.996       | 1.003       | 0.956       | 13     | 0.972          | 1.015       | 1.007       | 0.959       |
| 32     | 1.011          | 0.998       | 1.001       | 0.977       | 23     | 0.987          | 1.007       | 1.003       | 0.982       |
| 33     | 1.000          | 1.000       | 1.000       | 1.000       | 33     | 1.000          | 1.000       | 1.000       | 1.000       |
| 34     | 1.003          | 1.001       | 0.999       | 0.996       | 43     | 1.019          | 0.986       | 0.996       | 1.037       |
| 35     | 0.979          | 1.007       | 0.999       | 1.024       | 53     | 1.018          | 1.000       | 0.998       | 0.971       |
| 36     | 0.945          | 1.017       | 0.996       | 1.105       | 63     | 1.037          | 0.989       | 0.998       | 0.967       |

**Table ST5a.** The structural parameters of the respective TSs recorded for the gas phase nucleophilic substitution reactions of Y-phenyl carbonyl Isothiocyanate and X-Pyridines.

| Species | DM      | C <sub>1</sub> | O <sub>2</sub> | O <sub>3</sub> | N <sub>L</sub> | S <sub>L</sub> | N <sub>nu</sub> | N <sub>nu</sub> -C <sub>1</sub> | C <sub>1</sub> =O <sub>2</sub> | C <sub>1</sub> -N <sub>L</sub> | C <sub>1</sub> -O <sub>3</sub> | O <sub>2</sub> -H <sub>nu</sub> | N <sub>L</sub> -H <sub>ph</sub> | <N <sub>nu</sub> C <sub>1</sub> O <sub>2</sub> | <O <sub>2</sub> C <sub>1</sub> N <sub>L</sub> | <N <sub>L</sub> C <sub>1</sub> O <sub>3</sub> | <O <sub>2</sub> C <sub>1</sub> O <sub>3</sub> | <N <sub>nu</sub> C <sub>1</sub> O <sub>3</sub> | <N <sub>nu</sub> C <sub>1</sub> N <sub>L</sub> |
|---------|---------|----------------|----------------|----------------|----------------|----------------|-----------------|---------------------------------|--------------------------------|--------------------------------|--------------------------------|---------------------------------|---------------------------------|------------------------------------------------|-----------------------------------------------|-----------------------------------------------|-----------------------------------------------|------------------------------------------------|------------------------------------------------|
| tsfD11  | 7.8294  | -0.88714       | -0.13312       | 0.13297        | 0.185756       | -0.34697       | 0.219018        | 1.56858                         | 1.20878                        | 1.82143                        | 1.37524                        | 2.23532                         | 2.65881                         | 115.749                                        | 111.1321                                      | 101.1224                                      | 125.7333                                      | 102.4159                                       | 95.85492                                       |
| tsfD12  | 8.6049  | -0.90854       | -0.13074       | 0.14344        | 0.18767        | -0.34671       | 0.21439         | 1.56583                         | 1.20789                        | 1.83037                        | 1.37606                        | 2.23626                         | 2.65224                         | 115.8876                                       | 111.1245                                      | 100.9536                                      | 125.7545                                      | 102.5426                                       | 95.64608                                       |
| tsfD13  | 8.9841  | -0.92223       | -0.14535       | 0.128627       | 0.135494       | -0.34338       | 0.156616        | 1.56199                         | 1.20733                        | 1.8391                         | 1.37692                        | 2.23749                         | 2.6461                          | 116.0588                                       | 111.066                                       | 100.7537                                      | 125.7312                                      | 102.6771                                       | 95.55734                                       |
| tsfD14  | 7.7158  | -0.83947       | -0.14098       | 0.135559       | 0.134636       | -0.34561       | 0.221797        | 1.56233                         | 1.20713                        | 1.8417                         | 1.37616                        | 2.23968                         | 2.68974                         | 116.0185                                       | 111.0522                                      | 100.7667                                      | 125.8722                                      | 102.6966                                       | 95.35046                                       |
| tsfD15  | 10.843  | -0.9487        | -0.12057       | 0.150126       | 0.18012        | -0.33645       | 0.215521        | 1.55443                         | 1.20693                        | 1.84862                        | 1.37956                        | 2.23938                         | 2.60069                         | 116.4211                                       | 110.9741                                      | 100.4575                                      | 125.4509                                      | 102.9459                                       | 95.58229                                       |
| tsfD16  | 14.0551 | -0.8814        | -0.10969       | 0.155716       | 0.14962        | -0.32432       | 0.209849        | 1.54116                         | 1.2052                         | 1.88041                        | 1.38327                        | 2.24582                         | 2.60408                         | 117.0546                                       | 110.805                                       | 99.64665                                      | 125.2775                                      | 103.469                                        | 95.32483                                       |
| tsfD21  | 7.0487  | -0.9145        | -0.13229       | 0.142757       | 0.18459        | -0.35233       | 0.20539         | 1.57476                         | 1.20712                        | 1.82977                        | 1.3726                         | 2.23754                         | 2.65951                         | 115.7629                                       | 111.0369                                      | 101.024                                       | 126.0452                                      | 102.4425                                       | 95.51014                                       |
| tsfD22  | 7.9945  | -0.93009       | -0.13046       | 0.152368       | 0.186733       | -0.34988       | 0.199514        | 1.57135                         | 1.20621                        | 1.84114                        | 1.37304                        | 2.23881                         | 2.66949                         | 115.9123                                       | 110.996                                       | 100.797                                       | 126.107                                       | 102.6068                                       | 95.27355                                       |
| tsfD23  | 8.3497  | -1.04375       | -0.13088       | 0.16812        | 0.17195        | -0.34751       | 0.188136        | 1.56778                         | 1.20574                        | 1.84794                        | 1.37416                        | 2.23968                         | 2.64882                         | 116.0747                                       | 110.975                                       | 100.657                                       | 126.0413                                      | 102.7305                                       | 95.15903                                       |
| tsfD24  | 7.2989  | -0.8496        | -0.14028       | 0.163808       | 0.136015       | -0.35143       | 0.205444        | 1.56947                         | 1.20539                        | 1.84526                        | 1.37464                        | 2.24023                         | 2.61896                         | 116.0998                                       | 111.0127                                      | 100.8997                                      | 126.0467                                      | 102.5004                                       | 95.08899                                       |
| tsfD25  | 10.0097 | -1.0014        | -0.13271       | 0.172497       | 0.180762       | -0.34385       | 0.219125        | 1.56031                         | 1.20538                        | 1.85658                        | 1.37688                        | 2.24177                         | 2.59833                         | 116.4388                                       | 110.8865                                      | 100.403                                       | 125.7443                                      | 102.9756                                       | 95.18706                                       |
| tsfD26  | 13.0243 | -0.92319       | -0.10638       | 0.1651         | 0.152891       | -0.33092       | 0.199439        | 1.5469                          | 1.20379                        | 1.88775                        | 1.38058                        | 2.24766                         | 2.60045                         | 117.0657                                       | 110.7331                                      | 99.62999                                      | 125.546                                       | 103.5065                                       | 94.89665                                       |
| Species | DM      | C <sub>1</sub> | O <sub>2</sub> | O <sub>3</sub> | N <sub>L</sub> | S <sub>L</sub> | N <sub>nu</sub> | N <sub>nu</sub> -C <sub>1</sub> | C <sub>1</sub> =O <sub>2</sub> | C <sub>1</sub> -N <sub>L</sub> | C <sub>1</sub> -O <sub>3</sub> | O <sub>2</sub> -H <sub>nu</sub> | N <sub>L</sub> -H <sub>ph</sub> | <N <sub>nu</sub> C <sub>1</sub> O <sub>2</sub> | <O <sub>2</sub> C <sub>1</sub> N <sub>L</sub> | <N <sub>L</sub> C <sub>1</sub> O <sub>3</sub> | <O <sub>2</sub> C <sub>1</sub> O <sub>3</sub> | <N <sub>nu</sub> C <sub>1</sub> O <sub>3</sub> | <N <sub>nu</sub> C <sub>1</sub> N <sub>L</sub> |
| tsfD31  | 6.2873  | -0.87627       | -0.12046       | 0.125298       | 0.179121       | -0.3429        | 0.214226        | 1.57949                         | 1.20594                        | 1.83805                        | 1.36979                        | 2.235                           | 2.6082                          | 115.8087                                       | 111.01                                        | 101.2478                                      | 126.2476                                      | 102.5096                                       | 94.74575                                       |
| tsfD32  | 7.3386  | -0.9503        | -0.11701       | 0.138237       | 0.18804        | -0.33967       | 0.206757        | 1.57665                         | 1.2053                         | 1.84607                        | 1.37057                        | 2.23622                         | 2.61689                         | 115.9282                                       | 111.0106                                      | 101.1424                                      | 126.2384                                      | 102.625                                        | 94.54006                                       |
| tsfD33  | 7.6399  | -1.02478       | -0.12006       | 0.148556       | 0.160098       | -0.33493       | 0.200588        | 1.57268                         | 1.20483                        | 1.85462                        | 1.37143                        | 2.23693                         | 2.61583                         | 116.0905                                       | 110.9634                                      | 100.9517                                      | 126.2053                                      | 102.7568                                       | 94.45685                                       |
| tsfD34  | 6.7048  | -0.82529       | -0.13244       | 0.135803       | 0.126466       | -0.33398       | 0.21652         | 1.57392                         | 1.20447                        | 1.85294                        | 1.37177                        | 2.23792                         | 2.59647                         | 116.0976                                       | 111.0188                                      | 101.0979                                      | 126.2297                                      | 102.6342                                       | 94.32047                                       |
| tsfD35  | 9.1262  | -1.02957       | -0.11833       | 0.139927       | 0.155513       | -0.32628       | 0.197953        | 1.56496                         | 1.20458                        | 1.86343                        | 1.37396                        | 2.23911                         | 2.59047                         | 116.4285                                       | 110.8819                                      | 100.6341                                      | 125.9461                                      | 103.0347                                       | 94.48546                                       |
| tsfD36  | 12.0081 | -0.90735       | -0.09682       | 0.140208       | 0.140249       | -0.31301       | 0.211016        | 1.55173                         | 1.20327                        | 1.8915                         | 1.37779                        | 2.24439                         | 2.6007                          | 116.9933                                       | 110.7919                                      | 99.87475                                      | 125.7098                                      | 103.6043                                       | 94.20521                                       |
| tsfD41  | 5.3246  | -0.86013       | -0.10345       | 0.122305       | 0.157418       | -0.32282       | 0.205961        | 1.58637                         | 1.20431                        | 1.85409                        | 1.36403                        | 2.24422                         | 2.66239                         | 115.6198                                       | 110.8783                                      | 101.1022                                      | 126.8726                                      | 102.6288                                       | 94.11384                                       |
| tsfD42  | 6.3039  | -0.92327       | -0.10275       | 0.133294       | 0.162194       | -0.31886       | 0.198112        | 1.58334                         | 1.20363                        | 1.86182                        | 1.3651                         | 2.24536                         | 2.67211                         | 115.7365                                       | 110.8924                                      | 100.9497                                      | 126.8755                                      | 102.7305                                       | 93.9463                                        |
| tsfD43  | 6.6181  | -0.921         | -0.1267        | 0.118852       | 0.118846       | -0.31414       | 0.197862        | 1.57959                         | 1.20326                        | 1.86794                        | 1.36623                        | 2.24734                         | 2.65827                         | 115.907                                        | 110.878                                       | 100.8083                                      | 126.7945                                      | 102.8484                                       | 93.8463                                        |
| tsfD44  | 8.9015  | -0.74762       | -0.17448       | 0.130114       | 0.034371       | -0.36872       | 0.265523        | 1.56415                         | 1.21223                        | 1.81221                        | 1.37506                        | 2.26289                         | 2.74684                         | 116.2251                                       | 110.9892                                      | 101.1147                                      | 125.1402                                      | 102.5872                                       | 96.10776                                       |
| tsfD45  | 8.138   | -1.00359       | -0.09425       | 0.140069       | 0.152996       | -0.30833       | 0.194048        | 1.57163                         | 1.20312                        | 1.87503                        | 1.36921                        | 2.2469                          | 2.61876                         | 116.2323                                       | 110.8144                                      | 100.5304                                      | 126.4869                                      | 103.0932                                       | 93.95883                                       |
| tsfD46  | 11.095  | -0.89351       | -0.08597       | 0.141827       | 0.126152       | -0.29917       | 0.200742        | 1.558                           | 1.20202                        | 1.89989                        | 1.37367                        | 2.24984                         | 2.62238                         | 116.7914                                       | 110.7567                                      | 99.83145                                      | 126.1972                                      | 103.5919                                       | 93.76893                                       |
| Species | DM      | C <sub>1</sub> | O <sub>2</sub> | O <sub>3</sub> | N <sub>L</sub> | S <sub>L</sub> | N <sub>nu</sub> | N <sub>nu</sub> -C <sub>1</sub> | C <sub>1</sub> =O <sub>2</sub> | C <sub>1</sub> -N <sub>L</sub> | C <sub>1</sub> -O <sub>3</sub> | O <sub>2</sub> -H <sub>nu</sub> | N <sub>L</sub> -H <sub>ph</sub> | <N <sub>nu</sub> C <sub>1</sub> O <sub>2</sub> | <O <sub>2</sub> C <sub>1</sub> N <sub>L</sub> | <N <sub>L</sub> C <sub>1</sub> O <sub>3</sub> | <O <sub>2</sub> C <sub>1</sub> O <sub>3</sub> | <N <sub>nu</sub> C <sub>1</sub> O <sub>3</sub> | <N <sub>nu</sub> C <sub>1</sub> N <sub>L</sub> |
| tsfD51  | 5.6231  | -0.90392       | -0.13833       | 0.124323       | 0.182275       | -0.31848       | 0.20978         | 1.58503                         | 1.20535                        | 1.83316                        | 1.36854                        | 2.2399                          | 2.71043                         | 115.5868                                       | 111.0934                                      | 101.0761                                      | 126.5551                                      | 102.3702                                       | 94.8433                                        |
| tsfD52  | 6.8963  | -0.96751       | -0.13234       | 0.139653       | 0.201087       | -0.31994       | 0.205971        | 1.58291                         | 1.20456                        | 1.83748                        | 1.37009                        | 2.2417                          | 2.66784                         | 115.7512                                       | 111.1502                                      | 101.1032                                      | 126.4801                                      | 102.3928                                       | 94.57303                                       |
| tsfD53  | 7.0444  | -0.98228       | -0.13331       | 0.156031       | 0.180433       | -0.31257       | 0.194252        | 1.57914                         | 1.20405                        | 1.84372                        | 1.37145                        | 2.24152                         | 2.635                           | 115.9311                                       | 111.1157                                      | 100.9839                                      | 126.3876                                      | 102.4735                                       | 94.53849                                       |
| tsfD54  | 6.4816  | -0.86799       | -0.13539       | 0.140953       | 0.134895       | -0.32117       | 0.198934        | 1.57927                         | 1.20385                        | 1.84892                        | 1.37022                        | 2.24197                         | 2.70968                         | 115.858                                        | 111.063                                       | 100.796                                       | 126.628                                       | 102.4992                                       | 94.4949                                        |
| tsfD55  | 8.1526  | -0.95753       | -0.1372        | 0.136877       | 0.173096       | -0.30426       | 0.194341        | 1.57065                         | 1.20403                        | 1.85229                        | 1.3739                         | 2.24409                         | 2.62131                         | 116.265                                        | 111.0454                                      | 100.6595                                      | 126.1159                                      | 102.8094                                       | 94.51242                                       |
| tsfD56  | 10.6841 | -0.93359       | -0.11145       | 0.143894       | 0.165576       | -0.29918       | 0.208868        | 1.55665                         | 1.20284                        | 1.87798                        | 1.37822                        | 2.24756                         | 2.61698                         | 116.859                                        | 110.9448                                      | 99.98857                                      | 125.8203                                      | 103.3501                                       | 94.25644                                       |
| tsfD61  | 3.4765  | -0.89583       | -0.11985       | 0.114435       | 0.178777       | -0.2988        | 0.216542        | 1.59201                         | 1.20505                        | 1.83337                        | 1.36436                        | 2.24032                         | 2.73732                         | 115.3003                                       | 111.1981                                      | 101.459                                       | 126.9056                                      | 102.4057                                       | 93.97093                                       |
| tsfD62  | 4.5949  | -0.93507       | -0.11302       | 0.133272       | 0.183404       | -0.29973       | 0.210236        | 1.5896                          | 1.20428                        | 1.83816                        | 1.36579                        | 2.24153                         | 2.7033                          | 115.442                                        | 111.2416                                      | 102.4447                                      | 126.8627                                      | 102.4447                                       | 93.78692                                       |
| tsfD63  | 4.5674  | -1.0492        | -0.11148       | 0.149548       | 0.170521       | -0.29508       | 0.201645        | 1.58595                         | 1.20393                        | 1.84219                        | 1.36736                        | 2.24259                         | 2.67405                         | 115.6077                                       | 111.2443                                      | 101.3145                                      | 126.7507                                      | 102.5144                                       | 93.73114                                       |
| tsfD64  | 4.5171  | -0.81844       | -0.12779       | 0.128943       | 0.136791       | -0.29771       | 0.216279        | 1.58686                         | 1.20375                        | 1.84417                        | 1.36655                        | 2.24461                         | 2.73196                         | 115.534                                        | 111.2463                                      | 101.2927                                      | 126.9226                                      | 102.4641                                       | 93.63105                                       |
| tsfD65  | 5.1997  | -1.02628       | -0.10378       | 0.144648       | 0.178599       | -0.28775       | 0.205206        | 1.5773                          | 1.20386                        | 1.84963                        | 1.3701                         | 2.24261                         | 2.64503                         | 115.94                                         | 111.1769                                      | 101.0214                                      | 126.4465                                      | 102.7959                                       | 93.81651                                       |
| tsfD66  | 7.607   | -0.93472       | -0.09359       | 0.14558        | 0.157653       | -0.27432       | 0.212519        | 1.5631                          | 1.20284                        | 1.87178                        | 1.37483                        | 2.24572                         | 2.64314                         | 116.5044                                       | 111.1082                                      | 100.3638                                      | 126.1283                                      | 103.2917                                       | 93.67726                                       |

**Table ST5b.** The structural parameters of the respective TSs recorded for the solution phase nucleophilic substitution reactions of Y-phenyl carbonyl Isothiocyano phosphates and X-Pyridines

| Species | DM      | C        | O        | O <sub>NL</sub> | N <sub>E</sub> | S <sub>E</sub> | N <sub>nu</sub> | N <sub>nu</sub> -C | C=O     | C-N <sub>E</sub> | C-O <sub>NL</sub> | O-H <sub>nu</sub> | N <sub>E</sub> -H <sub>NL</sub> | <N <sub>nu</sub> CO | <OCN <sub>E</sub> | <N <sub>E</sub> CO <sub>NL</sub> | <OCO <sub>NL</sub> | <N <sub>nu</sub> CO <sub>NL</sub> | <N <sub>nu</sub> CN <sub>E</sub> |
|---------|---------|----------|----------|-----------------|----------------|----------------|-----------------|--------------------|---------|------------------|-------------------|-------------------|---------------------------------|---------------------|-------------------|----------------------------------|--------------------|-----------------------------------|----------------------------------|
| tssfD11 | 11.5358 | -0.81755 | -0.2684  | 0.059801        | 0.183987       | -0.41747       | 0.350106        | 1.54837            | 1.22179 | 1.74597          | 1.39111           | 2.25989           | 2.91435                         | 115.9115            | 111.5338          | 101.582                          | 123.4263           | 102.3344                          | 98.39906                         |
| tssfD12 | 12.6237 | -0.87383 | -0.24987 | 0.100269        | 0.179525       | -0.42197       | 0.355728        | 1.54701            | 1.22135 | 1.7452           | 1.39224           | 2.26017           | 2.72122                         | 116.0849            | 111.7226          | 101.7077                         | 123.2614           | 102.2563                          | 98.11149                         |
| tssfD13 | 13.1637 | -0.99185 | -0.24527 | 0.121725        | 0.15781        | -0.42389       | 0.358569        | 1.54341            | 1.22027 | 1.75521          | 1.39298           | 2.26185           | 2.70093                         | 116.2989            | 111.655           | 101.4893                         | 123.284            | 102.3771                          | 97.95804                         |
| tssfD14 | 11.8836 | -0.91102 | -0.24124 | 0.124014        | 0.150372       | -0.43079       | 0.395236        | 1.54164            | 1.21959 | 1.75996          | 1.39308           | 2.26474           | 2.6842                          | 116.4436            | 111.7837          | 101.4869                         | 123.3121           | 102.2999                          | 97.63807                         |
| tssfD15 | 18.0663 | -1.06337 | -0.24011 | 0.116472        | 0.170708       | -0.43189       | 0.480928        | 1.53029            | 1.21794 | 1.78451          | 1.39739           | 2.26783           | 2.96603                         | 116.7408            | 112.1051          | 100.5183                         | 123.5193           | 102.6282                          | 97.14271                         |
| tssfD16 | 19.198  | -0.82568 | -0.2112  | 0.13888         | 0.132431       | -0.42226       | 0.375251        | 1.52604            | 1.21554 | 1.80095          | 1.39796           | 2.27053           | 2.66624                         | 117.3474            | 111.2781          | 100.2434                         | 123.2269           | 103.0126                          | 97.60026                         |
| tssfD21 | 11.9696 | -1.06669 | -0.28591 | 0.069072        | 0.194606       | -0.4892        | 0.421086        | 1.55309            | 1.21902 | 1.74665          | 1.39636           | 2.26729           | 2.94166                         | 116.3112            | 111.0731          | 101.9107                         | 123.4656           | 102.3528                          | 97.97216                         |
| tssfD22 | 12.0923 | -0.89068 | -0.24197 | 0.104576        | 0.162488       | -0.4274        | 0.371006        | 1.5534             | 1.21889 | 1.76356          | 1.38655           | 2.26248           | 2.73681                         | 116.1527            | 111.4955          | 101.5829                         | 123.7673           | 102.3912                          | 97.49202                         |
| tssfD23 | 12.5097 | -0.9944  | -0.23624 | 0.127168        | 0.141049       | -0.42956       | 0.371338        | 1.5501             | 1.21794 | 1.77204          | 1.38745           | 2.26272           | 2.7134                          | 116.3291            | 111.4368          | 101.3838                         | 123.7785           | 102.5071                          | 97.37676                         |
| tssfD24 | 11.0565 | -0.88773 | -0.23654 | 0.129257        | 0.134413       | -0.42972       | 0.394926        | 1.5501             | 1.21749 | 1.77313          | 1.38776           | 2.26218           | 2.69079                         | 116.3678            | 111.4197          | 101.4684                         | 123.7977           | 102.3909                          | 97.36677                         |
| tssfD25 | 14.4673 | -0.88157 | -0.22812 | 0.121179        | 0.142552       | -0.42635       | 0.376701        | 1.54369            | 1.2167  | 1.7859           | 1.38897           | 2.2661            | 2.71038                         | 116.696             | 111.2728          | 100.9559                         | 123.7106           | 102.7402                          | 97.35305                         |
| tssfD26 | 17.9763 | -0.83996 | -0.20424 | 0.142508        | 0.119163       | -0.4249        | 0.382885        | 1.53341            | 1.21349 | 1.81589          | 1.39256           | 2.27122           | 2.6744                          | 117.3426            | 111.0652          | 100.2143                         | 123.6905           | 103.1088                          | 97.04724                         |
| Species | DM      | C        | O        | O <sub>NL</sub> | N <sub>E</sub> | S <sub>E</sub> | N <sub>nu</sub> | N <sub>nu</sub> -C | C=O     | C-N <sub>E</sub> | C-O <sub>NL</sub> | O-H <sub>nu</sub> | N <sub>E</sub> -H <sub>NL</sub> | <N <sub>nu</sub> CO | <OCN <sub>E</sub> | <N <sub>E</sub> CO <sub>NL</sub> | <OCO <sub>NL</sub> | <N <sub>nu</sub> CO <sub>NL</sub> | <N <sub>nu</sub> CN <sub>E</sub> |
| tssfD31 | 9.7583  | -1.00607 | -0.23669 | 0.097305        | 0.206694       | -0.46416       | 0.406326        | 1.56068            | 1.21748 | 1.77639          | 1.38046           | 2.25447           | 2.81253                         | 116.0191            | 111.2789          | 101.4909                         | 124.2497           | 102.5275                          | 97.13023                         |
| tssfD32 | 11.2348 | -0.86639 | -0.23721 | 0.095776        | 0.14619        | -0.42348       | 0.356498        | 1.55874            | 1.21665 | 1.78195          | 1.3812            | 2.25579           | 2.7694                          | 116.1666            | 111.332           | 101.4216                         | 124.2779           | 102.4944                          | 96.92211                         |
| tssfD33 | 11.5915 | -0.97185 | -0.23275 | 0.115768        | 0.125146       | -0.42385       | 0.357644        | 1.55556            | 1.21576 | 1.79016          | 1.3821            | 2.25644           | 2.74596                         | 116.3434            | 111.2823          | 101.2334                         | 124.2775           | 102.6125                          | 96.79212                         |
| tssfD34 | 10.208  | -0.85564 | -0.2317  | 0.120071        | 0.11956        | -0.42467       | 0.373202        | 1.55514            | 1.21544 | 1.79093          | 1.38239           | 2.25469           | 2.71191                         | 116.3657            | 111.2966          | 101.3077                         | 124.2906           | 102.5607                          | 96.70028                         |
| tssfD35 | 16.1992 | -0.95986 | -0.26681 | 0.074232        | 0.057122       | -0.43674       | 0.433089        | 1.54043            | 1.21278 | 1.82072          | 1.39389           | 2.26538           | 3.46461                         | 116.9365            | 110.6666          | 100.564                          | 124.5262           | 102.9519                          | 96.63291                         |
| tssfD36 | 16.6354 | -0.80641 | -0.20056 | 0.132625        | 0.109731       | -0.41575       | 0.364769        | 1.54006            | 1.21181 | 1.82861          | 1.3877            | 2.2629            | 2.68527                         | 117.2671            | 110.8895          | 100.1859                         | 124.1202           | 103.1601                          | 96.65299                         |
| tssfD41 | 9.96    | -0.9286  | -0.25485 | 0.056971        | 0.132796       | -0.47504       | 0.427049        | 1.56691            | 1.21325 | 1.79022          | 1.38239           | 2.26781           | 3.04638                         | 116.174             | 110.6285          | 101.5219                         | 124.8734           | 102.5758                          | 96.6507                          |
| tssfD42 | 9.8475  | -0.82335 | -0.21029 | 0.113414        | 0.12172        | -0.41781       | 0.361163        | 1.56818            | 1.21356 | 1.79943          | 1.37445           | 2.25918           | 2.72085                         | 115.9842            | 111.0325          | 101.4058                         | 125.0303           | 102.4616                          | 96.42004                         |
| tssfD43 | 10.4314 | -0.84335 | -0.22202 | 0.113914        | 0.090553       | -0.41786       | 0.366914        | 1.56362            | 1.21286 | 1.80788          | 1.37572           | 2.26114           | 2.692                           | 116.215             | 111.12            | 101.2373                         | 124.9509           | 102.6026                          | 96.09523                         |
| tssfD44 | 8.9031  | -0.7731  | -0.21967 | 0.120594        | 0.093892       | -0.41773       | 0.366366        | 1.56414            | 1.21222 | 1.81239          | 1.37504           | 2.2629            | 2.74966                         | 116.2225            | 110.9845          | 101.1065                         | 125.1439           | 102.5911                          | 96.11628                         |
| tssfD45 | 12.0537 | -0.82507 | -0.20171 | 0.121417        | 0.104461       | -0.4129        | 0.363544        | 1.55822            | 1.21181 | 1.82016          | 1.37715           | 2.26274           | 2.71242                         | 116.491             | 110.8391          | 100.7945                         | 124.9317           | 102.8259                          | 96.30849                         |
| tssfD46 | 15.5001 | -0.7582  | -0.18289 | 0.138034        | 0.086971       | -0.40916       | 0.362666        | 1.54792            | 1.2092  | 1.84717          | 1.38104           | 2.26638           | 2.69599                         | 117.0661            | 110.6782          | 100.068                          | 124.8576           | 103.2222                          | 96.05889                         |
| Species | DM      | C        | O        | O <sub>NL</sub> | N <sub>E</sub> | S <sub>E</sub> | N <sub>nu</sub> | N <sub>nu</sub> -C | C=O     | C-N <sub>E</sub> | C-O <sub>NL</sub> | O-H <sub>nu</sub> | N <sub>E</sub> -H <sub>NL</sub> | <N <sub>nu</sub> CO | <OCN <sub>E</sub> | <N <sub>E</sub> CO <sub>NL</sub> | <OCO <sub>NL</sub> | <N <sub>nu</sub> CO <sub>NL</sub> | <N <sub>nu</sub> CN <sub>E</sub> |
| tssfD51 | 13.0874 | -1.03478 | -0.27048 | 0.078425        | 0.087519       | -0.43445       | 0.491448        | 1.55228            | 1.21285 | 1.81802          | 1.38627           | 2.26665           | 3.41789                         | 116.4267            | 110.6762          | 101.1044                         | 125.0341           | 102.7728                          | 96.15914                         |
| tssfD52 | 10.9413 | -0.84539 | -0.23376 | 0.105435        | 0.138097       | -0.41195       | 0.393435        | 1.56461            | 1.21512 | 1.78995          | 1.3768            | 2.25735           | 2.76916                         | 116.0012            | 111.1666          | 101.4978                         | 124.7415           | 102.5364                          | 96.48051                         |
| tssfD53 | 11.1304 | -0.85916 | -0.23046 | 0.113605        | 0.111824       | -0.4117        | 0.389187        | 1.56149            | 1.21427 | 1.79766          | 1.37786           | 2.25924           | 2.75204                         | 116.1708            | 111.1047          | 101.2971                         | 124.7386           | 102.6704                          | 96.3733                          |
| tssfD54 | 9.8037  | -0.80832 | -0.21862 | 0.143742        | 0.12753        | -0.41232       | 0.398133        | 1.56237            | 1.21397 | 1.79488          | 1.37861           | 2.25665           | 2.69317                         | 116.1881            | 111.084           | 101.4337                         | 124.7311           | 102.4748                          | 96.49202                         |
| tssfD55 | 12.358  | -0.84221 | -0.22281 | 0.123073        | 0.116559       | -0.41142       | 0.395633        | 1.55435            | 1.21323 | 1.81069          | 1.37953           | 2.26051           | 2.73212                         | 116.5469            | 110.9908          | 100.8883                         | 124.6316           | 102.8584                          | 96.36582                         |
| tssfD56 | 15.1073 | -0.80353 | -0.19882 | 0.139609        | 0.105509       | -0.40725       | 0.400924        | 1.54402            | 1.21048 | 1.83795          | 1.38337           | 2.26436           | 2.69938                         | 117.1464            | 110.8196          | 100.1784                         | 124.5556           | 103.2528                          | 96.0848                          |
| tssfD61 | 7.6637  | -1.13647 | -0.25136 | 0.085714        | 0.173873       | -0.4538        | 0.440552        | 1.57313            | 1.21335 | 1.78189          | 1.38107           | 2.26426           | 2.93516                         | 115.9369            | 110.63            | 101.9343                         | 124.9742           | 102.4869                          | 96.46125                         |
| tssfD62 | 7.3592  | -0.80746 | -0.218   | 0.105924        | 0.119401       | -0.40583       | 0.37449         | 1.57067            | 1.21302 | 1.80628          | 1.37102           | 2.25635           | 2.81459                         | 115.8524            | 110.9713          | 101.3701                         | 125.3938           | 102.6071                          | 95.93025                         |
| tssfD63 | 7.5083  | -0.95078 | -0.20724 | 0.133931        | 0.102309       | -0.40878       | 0.371601        | 1.56723            | 1.21234 | 1.81241          | 1.37223           | 2.2565            | 2.76503                         | 116.0339            | 110.9674          | 101.2504                         | 125.3357           | 102.6828                          | 95.79857                         |
| tssfD64 | 3.7627  | -0.75056 | -0.28503 | 0.05227         | 0.289972       | -0.30749       | 0.300671        | 1.85811            | 1.21732 | 1.46311          | 1.41892           | 2.31674           | 3.33966                         | 108.049             | 119.3407          | 109.4579                         | 121.9271           | 94.16927                          | 97.38946                         |
| tssfD65 | 8.2827  | -0.81081 | -0.20444 | 0.124169        | 0.115525       | -0.39401       | 0.361258        | 1.56284            | 1.21182 | 1.81697          | 1.37486           | 2.25991           | 2.75594                         | 116.2786            | 110.8035          | 101.0195                         | 125.1556           | 102.8205                          | 96.04181                         |
| tssfD66 | 11.1222 | -0.8002  | -0.18129 | 0.148671        | 0.104203       | -0.38884       | 0.362273        | 1.55213            | 1.2094  | 1.84153          | 1.37908           | 2.264             | 2.71174                         | 116.877             | 110.6699          | 100.4061                         | 125.0228           | 103.1475                          | 95.79265                         |



**Table TS6.** The bond valence length coefficients ( $s$ ) are calculated for some specific system of the nucleophilic substitution reaction between Y-phenyl carbonyl isothiocyanates and X-pyridines in solution phase.

| $\alpha X$ | Species    | $C_1-N_{Nu}$ | $C_1-O_3$    | $C_1=O_2$ | $C_1-N_L$ | 33-X3     | $dC_1-N_{nu}$ | $dC_1-O_3$    | $dC_1=O_2$ | $dC_1-N_L$ | V-length   | $VLC_1-N_{Nu}$ | $VLC_1-O_3$    | $VLC_1=O_2$ | $VLC_1-N_L$ |             |
|------------|------------|--------------|--------------|-----------|-----------|-----------|---------------|---------------|------------|------------|------------|----------------|----------------|-------------|-------------|-------------|
| -0.27      | tsfD13     | 1.54341      | 1.39298      | 1.22027   | 1.75521   |           | 0.01215       | -0.01088      | -0.00451   | 0.03495    |            | 0.967695       | 1.029842       | 1.012264    | 0.909865    |             |
| -0.17      | tsfD23     | 1.5501       | 1.38745      | 1.21794   | 1.77204   |           | 0.00546       | -0.00535      | -0.00218   | 0.01812    |            | 0.985352       | 1.014565       | 1.005909    | 0.952207    |             |
| 0          | tsfD33     | 1.55556      | 1.3821       | 1.21576   | 1.79016   |           | 0             | 0             | 0          | 0          |            | 1              | 1              | 1           | 1           |             |
| 0.37       | tsfD43     | 1.56362      | 1.37572      | 1.21286   | 1.80788   |           | -0.00806      | 0.00638       | 0.0029     | -0.01772   |            | 1.022023       | 0.982905       | 0.992193    | 1.049057    |             |
| 0.5        | tsfD53     | 1.56149      | 1.37786      | 1.21427   | 1.79766   |           | -0.00593      | 0.00424       | 0.00149    | -0.0075    |            | 1.016156       | 0.988606       | 0.995981    | 1.020477    |             |
| 0.66       | tsfD63     | 1.56723      | 1.37223      | 1.21234   | 1.81241   |           | -0.01167      | 0.00987       | 0.00342    | -0.02225   |            | 1.032043       | 0.973677       | 0.990799    | 1.06198     |             |
| $\alpha Y$ | Species    | $C_1-N_{Nu}$ | $C_1-O_3$    | $C_1=O_2$ | $C_1-N_L$ | 33-3Y     | $dC_1-N_{nu}$ | $dC_1-O_3$    | $dC_1=O_2$ | $dC_1-N_L$ | V-length   | $VLC_1-N_{Nu}$ | $VLC_1-O_3$    | $VLC_1=O_2$ | $VLC_1-N_L$ |             |
| -0.27      | tsfD31     | 1.56068      | 1.38046      | 1.21748   | 1.77639   |           | -0.00512      | 0.00164       | -0.00172   | 0.01377    |            | 1.013934       | 0.995577       | 1.004659    | 0.963468    |             |
| -0.17      | tsfD32     | 1.55874      | 1.3812       | 1.21665   | 1.78195   |           | -0.00318      | 0.0009        | -0.00089   | 0.00821    |            | 1.008632       | 0.997571       | 1.002408    | 0.978055    |             |
| 0          | tsfD33     | 1.55556      | 1.3821       | 1.21576   | 1.79016   |           | 0             | 0             | 0          | 0          |            | 1              | 1              | 1           | 1           |             |
| 0.12       | tsfD34     | 1.55514      | 1.38239      | 1.21544   | 1.79093   |           | 0.00042       | -0.00029      | 0.00032    | -0.00077   |            | 0.998866       | 1.000784       | 0.999136    | 1.002083    |             |
| 0.23       | tsfD35     | 1.54043      | 1.39389      | 1.21278   | 1.82072   |           | 0.01513       | -0.01179      | 0.00298    | -0.03056   |            | 0.959933       | 1.032378       | 0.991978    | 1.086101    |             |
| 0.66       | tsfD36     | 1.54006      | 1.3877       | 1.21181   | 1.82861   |           | 0.0155        | -0.0056       | 0.00395    | -0.03845   |            | 0.958973       | 1.01525        | 0.989381    | 1.10951     |             |
| $\alpha X$ | $\alpha Y$ | Species      | $C_1-N_{Nu}$ | $C_1-O_3$ | $C_1=O_2$ | $C_1-N_L$ | 33-XY(X=Y)    | $dC_1-N_{nu}$ | $dC_1-O_3$ | $dC_1=O_2$ | $dC_1-N_L$ | V-length       | $VLC_1-N_{Nu}$ | $VLC_1-O_3$ | $VLC_1=O_2$ | $VLC_1-N_L$ |
| -0.27      | -0.27      | tssfD11      | 1.54837      | 1.39111   | 1.22179   | 1.74597   |               | 0.00719       | -0.00901   | -0.00603   | 0.04419    |                | 0.980755       | 1.02465     | 1.016431    | 0.887424    |
| -0.17      | -0.17      | tssfD22      | 1.5534       | 1.38655   | 1.21889   | 1.76356   |               | 0.00216       | -0.00445   | -0.00313   | 0.0266     |                | 0.994179       | 1.0121      | 1.008495    | 0.930631    |
| 0          | 0          | tssfD33      | 1.55556      | 1.3821    | 1.21576   | 1.79016   |               | 0             | 0          | 0          | 0          |                | 1              | 1           | 1           | 1           |
| 0.37       | 0.12       | tssfD44      | 1.56414      | 1.37504   | 1.21222   | 1.81239   |               | -0.00858      | 0.00706    | 0.00354    | -0.02223   |                | 1.02346        | 0.9811      | 0.990478    | 1.061923    |
| 0.5        | 0.23       | tssfD55      | 1.55435      | 1.37953   | 1.21323   | 1.81069   |               | 0.00121       | 0.00257    | 0.00253    | -0.02053   |                | 0.996735       | 0.993078    | 0.993185    | 1.057055    |
| 0.66       | 0.66       | tssfD66      | 1.55213      | 1.37908   | 1.2094    | 1.84153   |               | 0.00343       | 0.00302    | 0.00636    | -0.05137   |                | 0.990773       | 0.991871    | 0.982958    | 1.148938    |

**Table ST6a:** The bond valence length coefficients ( $s$ ) are calculated for some specific systems of the nucleophilic substitution reaction between Y-phenyl carbonyl isothiocyanates and X-pyridines in continuum acetonitrile polarization model.

| System | $s C_1-N_u$ | $s C_1-O_3$ | $s C_1=O_2$ | $s C_1-N_L$ | System | $s C_1-N_u$ | $s C_1-O_3$ | $s C_1=O_2$ | $s C_1-N_L$ |
|--------|-------------|-------------|-------------|-------------|--------|-------------|-------------|-------------|-------------|
| 31     | 1.014       | 0.996       | 1.005       | 0.964       | 13     | 0.968       | 1.030       | 1.012       | 0.910       |
| 32     | 1.009       | 0.998       | 1.002       | 0.978       | 23     | 0.985       | 1.015       | 1.006       | 0.952       |
| 33     | 1.000       | 1.000       | 1.000       | 1.000       | 33     | 1.000       | 1.000       | 1.000       | 1.000       |
| 34     | 0.999       | 1.001       | 0.999       | 1.002       | 43     | 1.022       | 0.983       | 0.992       | 1.049       |
| 35     | 0.960       | 1.032       | 0.992       | 1.086       | 53     | 1.016       | 0.989       | 0.996       | 1.021       |
| 36     | 0.959       | 1.015       | 0.989       | 1.110       | 63     | 1.032       | 0.974       | 0.991       | 1.062       |

**Table ST7. NBO charges, bond-coefficients and dipole moments of the TS for XY = 11, 33 and 66 are summarized of theoretical studies for the nucleophilic substitution reaction between Y-phenyl carbonyl isothiocyanates and X-pyridines in the gas phase and acetonitrile solvent continuum model.**

| System   | Area                           | Postn | ts11(g) | ts33(g) | ts66(g) | ts11(s) | ts33(s) | ts66(s) |
|----------|--------------------------------|-------|---------|---------|---------|---------|---------|---------|
| Natl Pop | C <sub>1</sub>                 | Val   | 2.990   | 2.988   | 2.991   | 2.993   | 2.988   | 2.986   |
|          | O <sub>2</sub>                 | Val   | 6.655   | 6.639   | 6.628   | 6.714   | 6.691   | 6.663   |
|          | N <sub>u</sub>                 | Val   | 5.362   | 5.340   | 5.337   | 5.371   | 5.344   | 5.333   |
|          | O <sub>3</sub>                 | Val   | 6.564   | 6.562   | 6.556   | 6.570   | 6.562   | 6.547   |
|          | N <sub>L</sub>                 | Val   | 5.532   | 5.536   | 5.534   | 5.527   | 5.538   | 5.547   |
| Charge   | C <sub>1</sub>                 | Nat   | 0.937   | 0.939   | 0.935   | 0.933   | 0.941   | 0.942   |
|          | O <sub>2</sub>                 | Nat   | -0.665  | -0.649  | -0.637  | -0.723  | -0.701  | -0.673  |
|          | N <sub>u</sub>                 | Nat   | -0.387  | -0.365  | -0.361  | -0.393  | -0.366  | -0.356  |
|          | O <sub>3</sub>                 | Nat   | -0.582  | -0.581  | -0.574  | -0.587  | -0.579  | -0.566  |
|          | N <sub>L</sub>                 | Nat   | -0.559  | -0.563  | -0.560  | -0.555  | -0.566  | -0.574  |
| WBI      | C <sub>1</sub> -N <sub>u</sub> |       | 0.722   | 0.718   | 0.728   | 0.757   | 0.749   | 0.751   |
|          | C <sub>1</sub> -O <sub>2</sub> |       | 1.639   | 1.662   | 1.674   | 1.568   | 1.600   | 1.635   |
|          | C <sub>1</sub> -O <sub>3</sub> |       | 0.911   | 0.918   | 0.908   | 0.888   | 0.900   | 0.901   |
|          | C <sub>1</sub> -N <sub>L</sub> |       | 0.476   | 0.445   | 0.429   | 0.546   | 0.502   | 0.456   |
|          | C <sub>ph</sub> -H             |       | 0.906   | 0.905   | 0.901   | 0.907   | 0.908   | 0.902   |
|          | C <sub>nu</sub> -H             |       | 0.894   | 0.895   | 0.891   | 0.898   | 0.899   | 0.894   |
| Dipole M |                                |       | 7.829   | 7.640   | 7.607   | 11.536  | 11.592  | 11.122  |

**Table ST7a. NBO Calculation data-base for tsfD11, tsfD33 and tsfD66 in the gas phase.**

| Gas Phase   |      |          |         |         |         |         |         |          |         |          |          |          |          |         |         |
|-------------|------|----------|---------|---------|---------|---------|---------|----------|---------|----------|----------|----------|----------|---------|---------|
| NBO Charge: |      |          |         |         |         |         |         |          |         |          |          |          |          |         |         |
|             |      | Natl Pop |         |         |         |         |         | Natl CRG |         |          |          |          |          |         |         |
| sys         | Orbt | C1       | O2      | O3      | NNu     | NL      | C-hnl   | C-hnu    | C1      | O2       | O3       | NNu      | NL       | Hnl     | Hnu     |
| Dts11T      | Val  | 2.98987  | 6.65526 | 6.56382 | 5.36219 | 5.53178 | 4.20953 | 3.84385  | 0.93686 | -0.66481 | -0.5819  | -0.38661 | -0.55893 | 0.24272 | 0.25832 |
| Dts33T      | Val  | 2.98771  | 6.63878 | 6.56221 | 5.34006 | 5.53644 | 4.22768 | 3.85977  | 0.93878 | -0.64856 | -0.58068 | -0.36467 | -0.56325 | 0.24415 | 0.25954 |
| Dts66T      | Val  | 2.99144  | 6.62745 | 6.55561 | 5.33688 | 5.53367 | 4.22385 | 3.85637  | 0.9354  | -0.63732 | -0.57412 | -0.36111 | -0.56013 | 0.25164 | 0.26744 |

Continued ...

| WBI    |        |        |        |        |        | NBO       |           |          |           |           |           |          |           |        |        |        |         |
|--------|--------|--------|--------|--------|--------|-----------|-----------|----------|-----------|-----------|-----------|----------|-----------|--------|--------|--------|---------|
| C1-O2  | C1-Nu  | C1-O3  | C1-NL  | Cnl-H  | Cnu-H  | C1-O2(BD) | C1-O2(BD) | Ocu% C * | Ocu% O2 * | C1-O3(BD) | C1-O3(BD) | Ocu% C * | Ocu% O3 * |        |        |        |         |
| 1.6391 | 0.7219 | 0.9109 | 0.4755 | 0.9062 | 0.8942 | 1.99431   | 0.02628   | 0.5832   | 0.8123    | 0.8123    | -0.5832   | 1.98719  | 0.12446   | 0.5576 | 0.8301 | 0.8301 | -0.5576 |
| 1.6621 | 0.7177 | 0.9176 | 0.4451 | 0.9052 | 0.8945 | 1.99432   | 0.02648   | 0.5807   | 0.8141    | 0.8141    | -0.5807   | 1.98693  | 0.12425   | 0.5577 | 0.8301 | 0.8301 | -0.5577 |
|        |        |        |        |        |        | 1.97588   | 0.44298   | 0.4981   | 0.8671    | 0.8671    | -0.4981   |          |           |        |        |        |         |
| 1.6744 | 0.7283 | 0.9078 | 0.429  | 0.9011 | 0.8911 | 1.99445   | 0.02484   | 0.5814   | 0.8136    | 0.8136    | -0.5814   | 1.98697  | 0.12662   | 0.557  | 0.8305 | 0.8305 | -0.557  |
|        |        |        |        |        |        | 1.97722   | 0.43704   | 0.504    | 0.8637    | 0.8637    | -0.504    |          |           |        |        |        |         |

Continued ...

| C1-N26(B) |           |          |          |           |           | C6-H10(B) |            |            |            |            |            | C18-H21(E) |         |        |        |        |         |
|-----------|-----------|----------|----------|-----------|-----------|-----------|------------|------------|------------|------------|------------|------------|---------|--------|--------|--------|---------|
| C1-N26(B) | C1-N26(B) | Ocu% C * | Ocu% N * | C6-H10(B) | C6-H10(B) | Ocu% C6 * | Ocu% H10 * | C18-H21(E) | C18-H21(E) | Ocu% C18 * | Ocu% H21 * |            |         |        |        |        |         |
| 1.97274   | 0.20333   | 0.5641   | 0.8257   | 0.8257    | -0.5641   | 1.97535   | 0.01343    | 0.7887     | 0.6148     | 0.6148     | -0.7887    | 1.9768     | 0.01769 | 0.7945 | 0.6073 | 0.6073 | -0.7945 |
| 1.96982   | 0.21475   | 0.5631   | 0.8264   | 0.8264    | -0.5631   | 1.97494   | 0.01342    | 0.7888     | 0.6146     | 0.6146     | -0.7888    | 1.97744    | 0.01733 | 0.7948 | 0.6068 | 0.6068 | -0.7948 |
| 1.97083   | 0.2084    | 0.5644   | 0.8255   | 0.8255    | -0.5644   | 1.97397   | 0.0132     | 0.7911     | 0.6117     | 0.6117     | -0.7911    | 1.97662    | 0.01631 | 0.7971 | 0.6039 | 0.6039 | -0.7971 |

**Table ST7b.** NBO Calculation data-base for tssFD11, tssFD33 and tssFD66 in the solvent phase.

| Solvent Phase |      |         |         |         |         |         |         |         |         |          |          |          |          |         |         |
|---------------|------|---------|---------|---------|---------|---------|---------|---------|---------|----------|----------|----------|----------|---------|---------|
| NBO Charge:   |      |         |         |         |         |         |         |         |         |          |          |          |          |         |         |
| Natl Pop      |      |         |         |         |         |         |         |         |         | Natl CRG |          |          |          |         |         |
| sys           | Orbt | C1      | O2      | O3      | NNu     | NL      | C-hnl   | C-hnu   | C1      | O2       | O3       | NNu      | NL       | Hnl     | Hnu     |
| Dsts11T       | Val  | 2.99314 | 6.71368 | 6.56966 | 0.74303 | 5.52676 | 4.23005 | 3.84864 | 0.933   | -0.72261 | -0.58681 | -0.39245 | -0.55469 | 0.23917 | 0.25526 |
| Dsts33T       | Val  | 2.98752 | 6.69144 | 6.56146 | 5.34404 | 5.53819 | 4.25161 | 3.8632  | 0.94045 | -0.70056 | -0.57928 | -0.36627 | -0.56582 | 0.23803 | 0.25558 |
| Dsts66T       | Val  | 2.98574 | 6.66307 | 6.54734 | 5.33282 | 5.54677 | 4.23821 | 3.85202 | 0.94232 | -0.67254 | -0.56551 | -0.35548 | -0.57375 | 0.24984 | 0.26589 |

Continued ...

| WBI    |        |        |        |        |        | NBO       |           |          |           |           |           |          |           |        |        |        |         |
|--------|--------|--------|--------|--------|--------|-----------|-----------|----------|-----------|-----------|-----------|----------|-----------|--------|--------|--------|---------|
| C1-O2  | C1-Nu  | C1-O3  | C1-NL  | Cnl-H  | Cnu-H  | C1-O2(BD) | C1-O2(BD) | Ocu% C * | Ocu% O2 * | C1-O3(BD) | C1-O3(BD) | Ocu% C * | Ocu% O3 * |        |        |        |         |
| 1.5683 | 0.7573 | 0.8877 | 0.5456 | 0.9069 | 0.898  | 1.99375   | 0.02828   | 0.5854   | 0.8108    | 0.8108    | -0.5854   | 1.9866   | 0.13005   | 0.5579 | 0.8299 | 0.8299 | -0.5579 |
| 1.6002 | 0.7489 | 0.9    | 0.5019 | 0.9081 | 0.8985 | 1.99406   | 0.02701   | 0.5838   | 0.8119    | 0.8119    | -0.5838   | 1.98747  | 0.12572   | 0.5573 | 0.8303 | 0.8303 | -0.5573 |
| 1.6346 | 0.7511 | 0.9007 | 0.4562 | 0.9018 | 0.8936 | 1.99437   | 0.02586   | 0.5828   | 0.8126    | 0.8126    | -0.5828   | 1.98749  | 0.12581   | 0.5562 | 0.8311 | 0.8311 | -0.5562 |

Continued ...

| C1-N26(BI | C1-N26(BI | Ocu% C * | Ocu% N * | C6-H10(BI | C6-H10(BI | Ocu% C6 * | Ocu% H10 * | C18-H21(E | C18-H21(E | Ocu% C18 * | Ocu% H21 * |         |         |        |        |        |         |  |
|-----------|-----------|----------|----------|-----------|-----------|-----------|------------|-----------|-----------|------------|------------|---------|---------|--------|--------|--------|---------|--|
| 1.97459   | 0.18184   | 0.5756   | 0.8178   | 0.8178    | -0.5756   | 1.97624   | 0.01467    | 0.7879    | 0.6158    | 0.6158     | -0.7879    | 1.97742 | 0.01628 | 0.7932 | 0.6089 | 0.6089 | -0.7932 |  |
| 1.97406   | 0.18713   | 0.574    | 0.8189   | 0.8189    | -0.574    | 1.97633   | 0.01421    | 0.7875    | 0.6163    | 0.6163     | -0.7875    | 1.97821 | 0.0162  | 0.7934 | 0.6087 | 0.6087 | -0.7934 |  |
| 1.97466   | 0.18664   | 0.5726   | 0.8198   | 0.8198    | -0.5726   | 1.97435   | 0.01353    | 0.7906    | 0.6123    | 0.6123     | -0.7906    | 1.97714 | 0.01523 | 0.7964 | 0.6048 | 0.6048 | -0.7964 |  |

**Table ST8a.** Energy profiles for the nucleophilic substitution reaction of Y-phenyl carbonyl isothiocyanate and X-pyridines in the gas phase.

| Species | $\Delta E_o^\ddagger$ Kcal | $\Delta E_t^\ddagger$ Kcal | $\Delta H^\ddagger$ Kcal | $\Delta G^\ddagger$ Kcal | $\Delta E_o^\circ$ Kcal | $\Delta E_t^\circ$ Kcal | $\Delta H^\circ$ Kcal | $\Delta G^\circ$ Kcal |
|---------|----------------------------|----------------------------|--------------------------|--------------------------|-------------------------|-------------------------|-----------------------|-----------------------|
|         | TS-RC                      | TS-RC                      | TS-RC                    | TS-RC                    | PC-RC                   | PC-RC                   | PC-RC                 | PC-RC                 |
| tsfD11  | 18.3421                    | 17.48932                   | 17.48869                 | 20.80821                 | 9.525594                | 9.772205                | 9.771577              | 10.48066              |
| tsfD12  | 18.04027                   | 17.20631                   | 17.20631                 | 20.30181                 | 9.666783                | 9.933475                | 9.933475              | 10.39093              |
| tsfD13  | 19.68685                   | 19.43773                   | 20.0301                  | 19.03111                 | 11.64783                | 11.91515                | 12.50752              | 11.77459              |
| tsfD14  | 18.54353                   | 17.76668                   | 17.76668                 | 20.10164                 | 10.46184                | 10.79316                | 10.79316              | 10.08345              |
| tsfD15  | 17.44665                   | 16.59386                   | 16.59386                 | 19.89958                 | 9.893942                | 10.13365                | 10.13365              | 10.75049              |
| tsfD16  | 18.9991                    | 18.30822                   | 18.30822                 | 19.36494                 | 12.74346                | 12.56023                | 12.56023              | 14.10202              |
|         |                            |                            |                          |                          |                         |                         |                       |                       |
| tsfD21  | 18.38289                   | 16.92017                   | 16.92017                 | 22.8997                  | 9.838093                | 9.444018                | 9.444018              | 12.9656               |
| tsfD22  | 18.96522                   | 18.03023                   | 18.03023                 | 22.06763                 | 10.78312                | 10.96447                | 10.9651               | 11.62775              |
| tsfD23  | 18.62448                   | 17.68384                   | 17.68384                 | 21.59386                 | 10.84713                | 10.98518                | 10.98518              | 12.46799              |
| tsfD24  | 20.2353                    | 19.37749                   | 19.37812                 | 22.38452                 | 12.44791                | 12.63302                | 12.63302              | 13.17393              |
| tsfD25  | 18.33583                   | 17.44225                   | 17.44288                 | 20.9789                  | 10.92996                | 10.55596                | 10.55596              | 13.4331               |
| tsfD26  | 17.29165                   | 16.40121                   | 16.40059                 | 19.44087                 | 11.17908                | 10.77183                | 10.77183              | 14.11645              |
| Species |                            |                            |                          |                          |                         |                         |                       |                       |
| tsfD31  | 20.49007                   | 19.61595                   | 19.61595                 | 22.66062                 | 11.93837                | 12.13227                | 12.13227              | 12.71209              |
| tsfD32  | 21.36419                   | 20.42606                   | 20.42606                 | 24.06624                 | 13.20343                | 12.76166                | 12.76166              | 16.20982              |
| tsfD33  | 21.1433                    | 20.24471                   | 20.24408                 | 23.27244                 | 13.35215                | 12.94803                | 12.9474               | 15.87473              |
| tsfD34  | 21.13515                   | 20.25538                   | 20.25538                 | 23.4676                  | 13.20594                | 12.82629                | 12.82629              | 15.69903              |
| tsfD35  | 20.71472                   | 19.35678                   | 19.35741                 | 23.95141                 | 13.28751                | 13.00639                | 13.00702              | 14.96798              |
| tsfD36  | 20.29742                   | 19.39318                   | 19.39318                 | 22.5301                  | 14.06751                | 13.66841                | 13.66841              | 16.59135              |
|         |                            |                            |                          |                          |                         |                         |                       |                       |
| tsfD41  | 23.79704                   | 22.98881                   | 22.98881                 | 25.79566                 | 15.36394                | 15.63503                | 15.63503              | 15.90172              |
| tsfD42  | 23.59436                   | 22.76165                   | 22.76165                 | 25.89606                 | 15.55659                | 15.80759                | 15.80759              | 16.34223              |
| tsfD43  | 24.24132                   | 22.8062                    | 22.8062                  | 28.68032                 | 16.48969                | 16.15774                | 16.15774              | 19.29466              |
| tsfD44  | 10.2579                    | 9.494846                   | 9.494846                 | 11.71811                 | 16.28387                | 16.0153                 | 16.0153               | 18.15071              |
| tsfD45  | 24.13966                   | 23.26805                   | 23.26805                 | 26.79716                 | 16.79906                | 17.02496                | 17.02559              | 17.70392              |
| tsfD46  | 24.05307                   | 23.28813                   | 23.28813                 | 25.45492                 | 17.85202                | 17.59976                | 17.59976              | 19.78663              |
| Species |                            |                            |                          |                          |                         |                         |                       |                       |
| tsfD51  | 21.93083                   | 19.9548                    | 19.95543                 | 28.76754                 | 12.40712                | 12.06324                | 12.06387              | 16.27509              |
| tsfD52  | 21.63653                   | 20.80759                   | 20.80821                 | 23.85289                 | 12.51568                | 12.72526                | 12.72526              | 13.80207              |
| tsfD53  | 22.55646                   | 21.79654                   | 21.79654                 | 23.19212                 | 13.78952                | 14.06625                | 14.06625              | 13.81023              |
| tsfD54  | 22.11971                   | 21.33407                   | 21.33344                 | 23.92819                 | 13.55734                | 13.28751                | 13.28689              | 15.21459              |
| tsfD55  | 21.13326                   | 20.2993                    | 20.2993                  | 23.43371                 | 12.78049                | 12.99384                | 12.99384              | 13.79266              |
| tsfD56  | 20.11544                   | 19.27584                   | 19.27584                 | 22.38138                 | 12.94489                | 12.59537                | 12.59537              | 15.67268              |
|         |                            |                            |                          |                          |                         |                         |                       |                       |
| tsfD61  | 25.83582                   | 24.97739                   | 24.97739                 | 27.86456                 | 15.49509                | 15.73166                | 15.73229              | 15.76555              |
| tsfD62  | 25.70153                   | 24.79855                   | 24.79917                 | 28.36782                 | 15.75614                | 15.94439                | 15.94502              | 16.74635              |
| tsfD63  | 25.70906                   | 24.3731                    | 24.3731                  | 29.5011                  | 16.11507                | 15.87285                | 15.87285              | 18.28186              |
| tsfD64  | 25.42982                   | 24.57202                   | 24.57202                 | 27.80118                 | 15.7919                 | 16.00463                | 16.004                | 16.32466              |
| tsfD65  | 25.36017                   | 24.49483                   | 24.49483                 | 27.50186                 | 16.16402                | 16.38239                | 16.38239              | 16.60578              |
| tsfD66  | 24.62786                   | 24.33168                   | 24.33231                 | 24.86883                 | 16.58194                | 16.80533                | 16.80533              | 16.9666               |

**Table ST8b.** Energy profiles for the nucleophilic substitution reaction of Y-phenyl carbonyl isothiocyanate and X-pyridines in the solution phase.

| Species | $\Delta E_o^\ddagger$ Kcal | $\Delta E_t^\ddagger$ Kcal | $\Delta H^\ddagger$ Kcal | $\Delta G^\ddagger$ Kcal | $\Delta E_o^\circ$ Kcal | $\Delta E_t^\circ$ Kcal | $\Delta H^\circ$ Kcal | $\Delta G^\circ$ Kcal |
|---------|----------------------------|----------------------------|--------------------------|--------------------------|-------------------------|-------------------------|-----------------------|-----------------------|
|         | TS-RC                      | TS-RC                      | TS-RC                    | TS-RC                    | PC-RC                   | PC-RC                   | PC-RC                 | PC-RC                 |
| tssfD11 | 0.311245                   | -0.52774                   | -0.52774                 | 3.203436                 | -13.7456                | -13.2549                | -13.2549              | -13.5335              |
| tssfD12 | 0.35517                    | -1.03916                   | -1.03978                 | 4.310363                 | -13.3578                | -12.8734                | -12.874               | -13.3007              |
| tssfD13 | 1.194151                   | 1.052333                   | 1.051706                 | 0.244101                 | -12.1316                | -11.5299                | -11.5305              | -13.6257              |
| tssfD14 | 0.613704                   | 0.343248                   | 0.343875                 | 1.541791                 | -12.6619                | -11.6064                | -11.6064              | -14.5683              |
| tssfD15 | 1.426329                   | 1.277609                   | 1.278237                 | 0.654492                 | -10.0671                | -9.94477                | -9.94414              | -11.0831              |
| tssfD16 | 1.158382                   | 0.972012                   | 0.972012                 | 1.578814                 | -10.0094                | -9.4459                 | -9.4459               | -10.6187              |
|         |                            |                            |                          |                          |                         |                         |                       |                       |
| tssfD21 | 0.313755                   | 0.103539                   | 0.103539                 | -0.06087                 | -12.5282                | -12.035                 | -12.0344              | -12.9311              |
| tssfD22 | 0.677083                   | 0.424824                   | 0.424824                 | 1.241841                 | -12.0783                | -11.0962                | -11.0962              | -13.061               |
| tssfD23 | 0.738579                   | 0.522088                   | 0.522088                 | 0.906751                 | -11.6598                | -11.1559                | -11.1559              | -12.0319              |
| tssfD24 | 0.882906                   | 0.623744                   | 0.623117                 | 1.520455                 | -11.506                 | -10.4656                | -10.4662              | -13.4312              |
| tssfD25 | 0.938127                   | 0.735441                   | 0.734814                 | 1.060491                 | -10.8314                | -10.3677                | -10.3683              | -10.7517              |
| tssfD26 | 1.403739                   | 0.68524                    | 0.68524                  | 2.804967                 | -8.78011                | -8.28124                | -8.28124              | -9.05371              |
| Species |                            |                            |                          |                          |                         |                         |                       |                       |
| ttsfD31 | 13.58935                   | 12.64808                   | 12.64808                 | 15.72978                 | 1.142067                | 0.903614                | 0.903614              | 2.718999              |
| ttsfD32 | 13.16327                   | 12.2722                    | 12.27158                 | 14.70631                 | 1.175953                | 0.959462                | 0.958834              | 3.099269              |
| ttsfD33 | 1.101279                   | 0.870356                   | 0.870356                 | 1.066766                 | -10.5127                | -10.0226                | -10.0226              | -10.7154              |
| ttsfD34 | 13.23543                   | 11.73945                   | 11.73945                 | 17.89155                 | 1.608934                | 1.376128                | 1.376128              | 3.730544              |
| ttsfD35 | 1.565636                   | 1.406876                   | 1.407504                 | 1.487197                 | -8.98719                | -8.41929                | -8.41929              | -10.3483              |
| ttsfD36 | 1.858683                   | 1.089356                   | 1.089356                 | 3.729289                 | -7.70519                | -7.20444                | -7.20444              | -8.06036              |
|         |                            |                            |                          |                          |                         |                         |                       |                       |
| tssfD41 | 17.49496                   | 17.21886                   | 17.21886                 | 16.86118                 | 6.63905                 | 7.015556                | 7.015556              | 6.718116              |
| tssfD42 | 17.42719                   | 16.59825                   | 16.59825                 | 19.60528                 | 6.500371                | 6.335963                | 6.335963              | 8.894947              |
| tssfD43 | 17.12599                   | 16.27571                   | 16.27571                 | 18.95392                 | 6.229286                | 6.655365                | 6.655993              | 5.771832              |
| tssfD44 | 17.5847                    | 16.70744                   | 16.70744                 | 20.31248                 | 6.747609                | 7.115957                | 7.115957              | 6.682348              |
| tssfD45 | 16.7658                    | 15.91929                   | 15.91866                 | 19.6674                  | 6.484683                | 6.280742                | 6.280115              | 9.444645              |
| tssfD46 | 15.79253                   | 15.52647                   | 15.52584                 | 15.57918                 | 6.883151                | 7.252127                | 7.251499              | 6.922684              |
| Species |                            |                            |                          |                          |                         |                         |                       |                       |
| tssfD51 | 16.30081                   | 16.05608                   | 16.05608                 | 15.6275                  | 4.700673                | 5.176326                | 5.176326              | 3.465107              |
| tssfD52 | 16.73066                   | 15.99773                   | 15.9971                  | 17.33307                 | 4.922812                | 5.413524                | 5.412897              | 3.483933              |
| tssfD53 | 16.42004                   | 15.61306                   | 15.61306                 | 16.7112                  | 4.937245                | 4.811115                | 4.811743              | 5.671431              |
| tssfD54 | 16.83043                   | 16.02471                   | 16.02534                 | 18.49459                 | 5.438625                | 5.867214                | 5.867214              | 4.642315              |
| tssfD55 | 16.11758                   | 15.92431                   | 15.92431                 | 15.16                    | 5.248489                | 5.689628                | 5.689628              | 4.379389              |
| tssfD56 | 2.224521                   | 2.040033                   | 2.039406                 | 2.323668                 | -7.2013                 | -6.76769                | -6.76769              | -6.99799              |
|         |                            |                            |                          |                          |                         |                         |                       |                       |
| tssfD61 | 18.48455                   | 17.65561                   | 17.65561                 | 20.29805                 | 6.916409                | 6.718116                | 6.718116              | 9.346754              |
| tssfD62 | 18.49082                   | 17.63804                   | 17.63866                 | 20.52709                 | 6.932725                | 7.275345                | 7.275345              | 7.1329                |
| tssfD63 | 18.08106                   | 16.67355                   | 16.67355                 | 21.79529                 | 6.910134                | 6.701801                | 6.702429              | 8.75062               |
| tssfD64 | 15.65824                   | 14.74396                   | 14.74396                 | 18.19464                 | 7.362569                | 7.179336                | 7.179336              | 8.62449               |
| tssfD65 | 17.87649                   | 17.03563                   | 17.03563                 | 20.04705                 | 7.216359                | 7.585334                | 7.585334              | 7.025596              |
| tssfD66 | 17.04504                   | 16.22426                   | 16.22426                 | 18.92694                 | 7.769822                | 8.160761                | 8.160761              | 7.343116              |

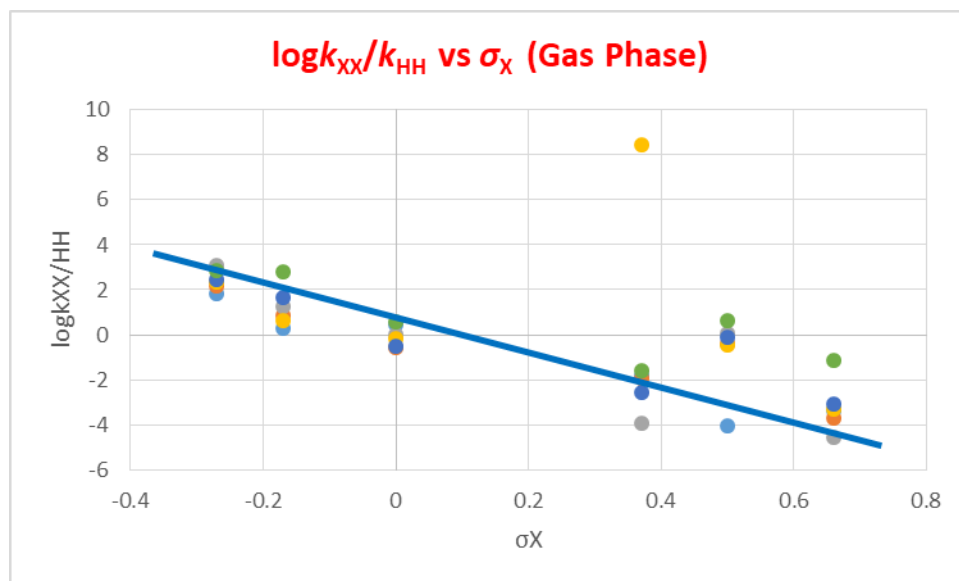

**Figure SF5a.** Hammett plots for nucleophilic variation in the substitution reaction between Y-phenyl carbonyl isothiocyanate and X-Pyridine in gas phase.

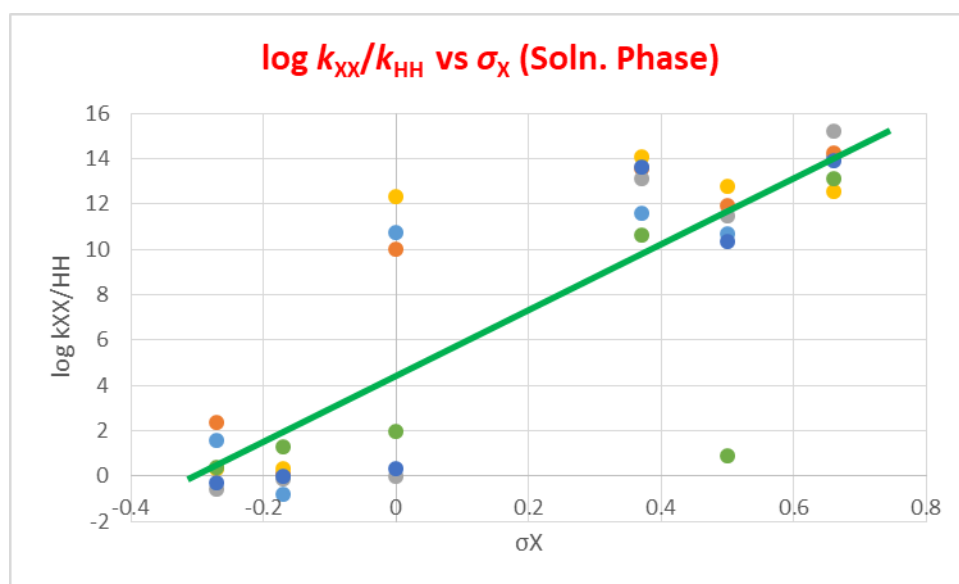

**Figure SF6a.** Hammett plots for nucleophilic variation in the substitution reaction between Y-phenyl carbonyl isothiocyanate and X-Pyridine in solution phase.

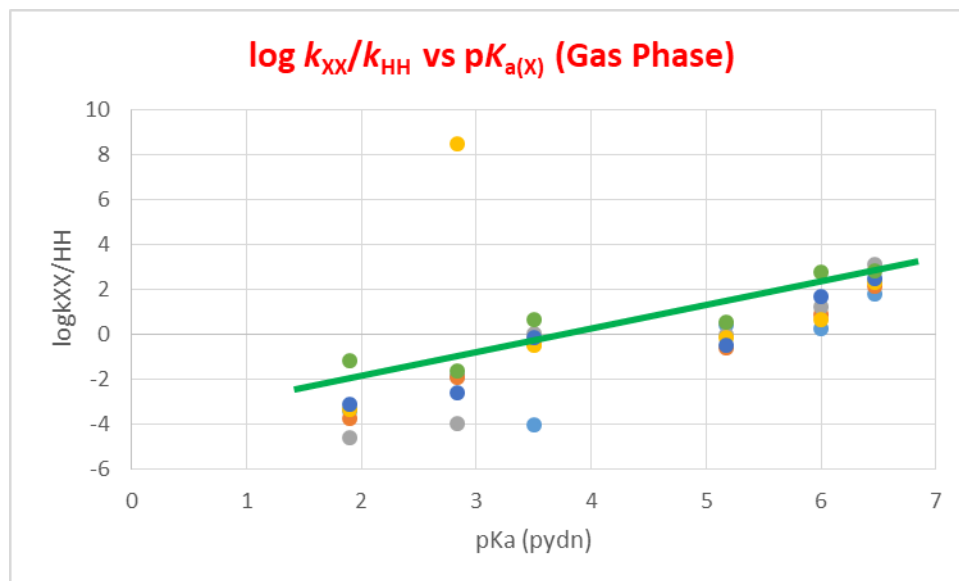

**Figure SF5b.** Brønsted plots for nucleophilic  $pK_a$  variation in the substitution reaction between Y-phenyl carbonyl isothiocyanate and X-Pyridine in gas phase.

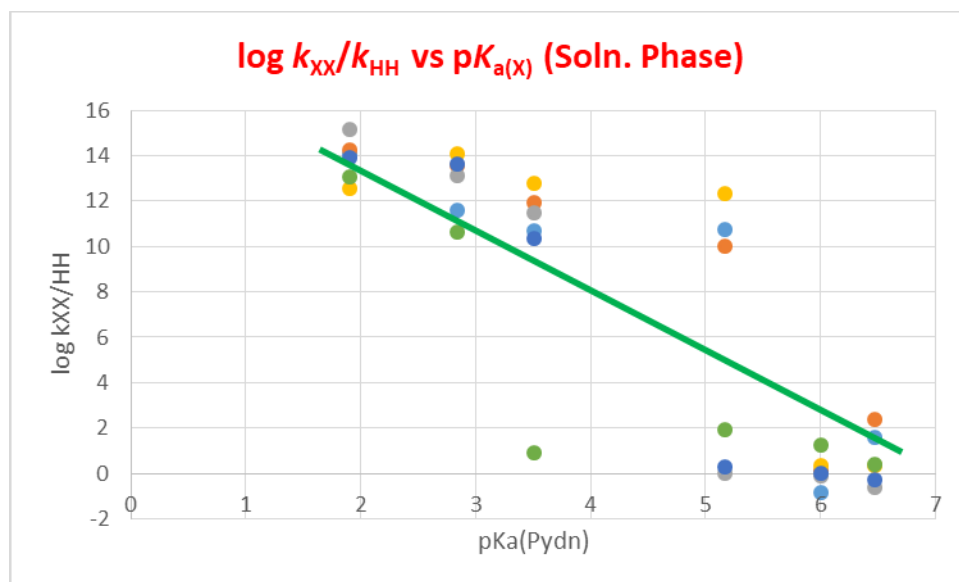

**Figure SF6b.** Brønsted plots for nucleophilic  $pK_a$  variation in the substitution reaction between Y-phenyl carbonyl isothiocyanate and X-Pyridine in gas phase.



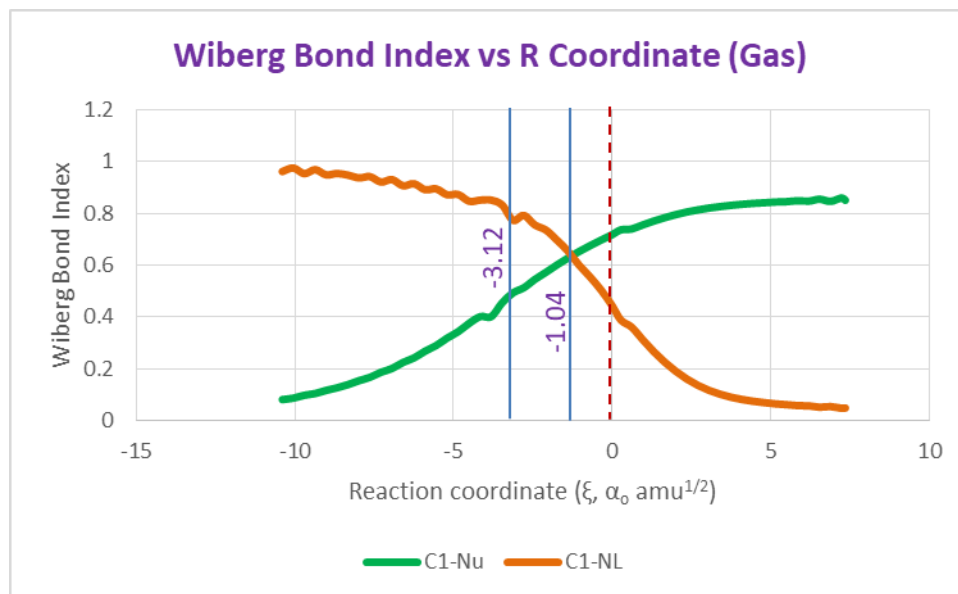

**Figure SF7a.** The Wiberg bond index crossing point of formation and breaking bond in the gas phase is closer before to the TS.

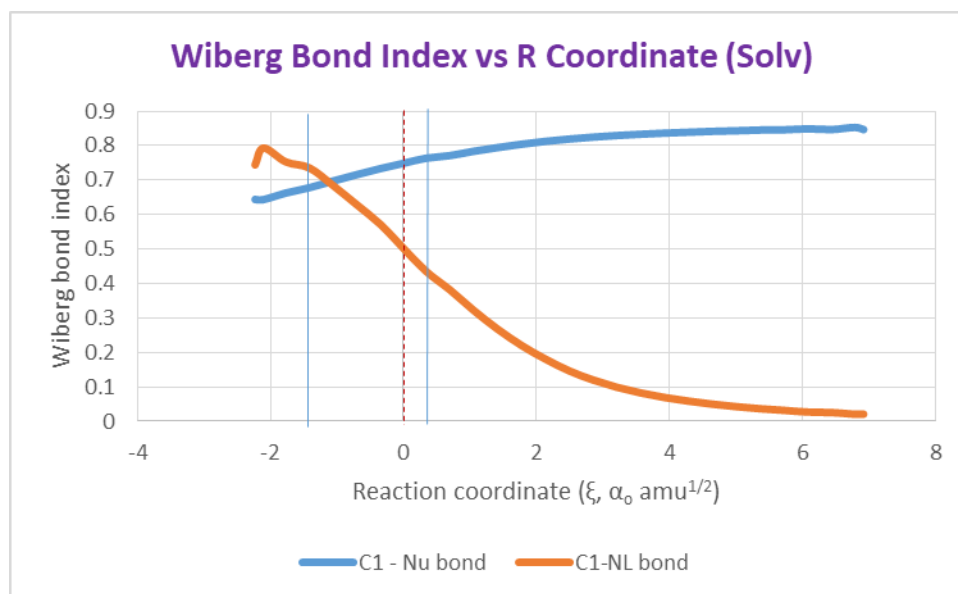

**Figure SF7b.** The Wiberg bond index crossing point of formation and breaking bond in the solvent model is far before to the TS.

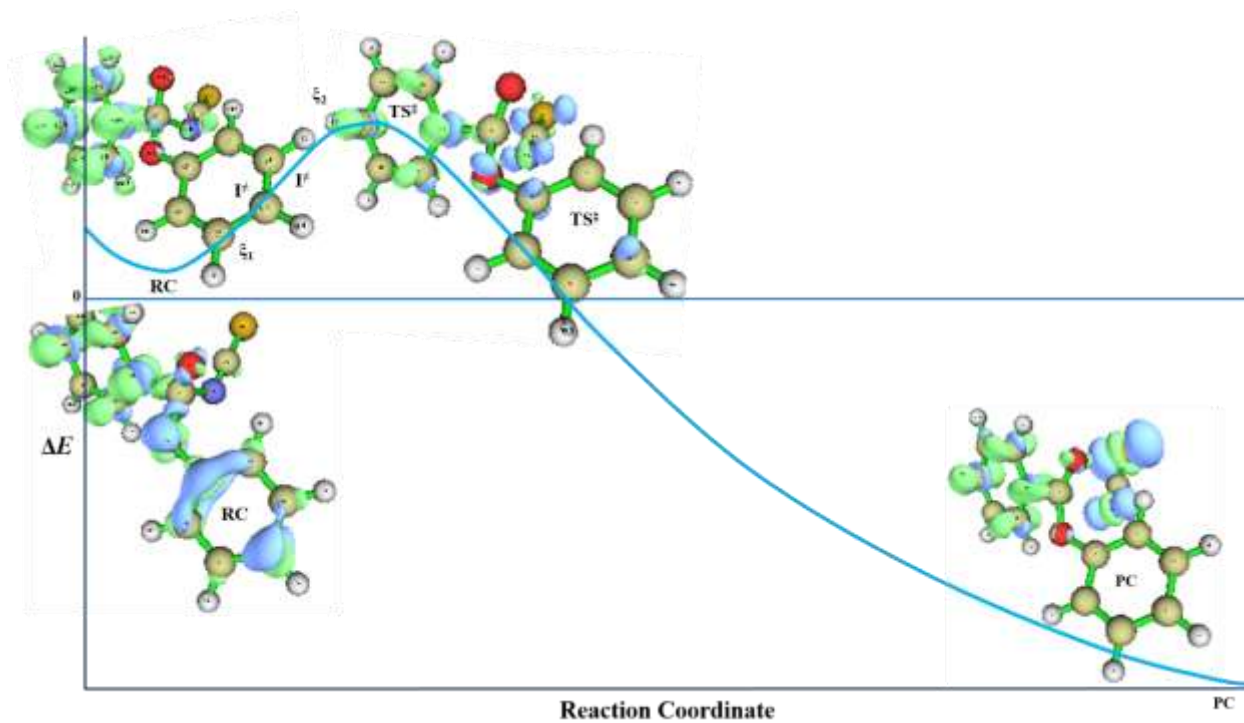

**Figure SF8.** Dual descriptor densities for RC,  $\xi_1$ , I,  $\xi_2$ , TS,  $\xi_3$ , and PC for the studied substitution process in solvent model.

## Carbncs1.

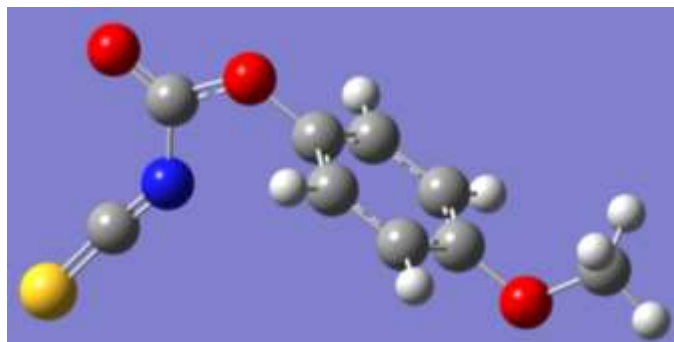

Input orientation:

| Center<br>Number | Atomic<br>Number | Atomic<br>Type | Coordinates (Angstroms) |           |           |
|------------------|------------------|----------------|-------------------------|-----------|-----------|
|                  |                  |                | X                       | Y         | Z         |
| 1                | 6                | 0              | -2.036076               | 1.381087  | 0.000033  |
| 2                | 8                | 0              | -3.005418               | 2.092170  | 0.000065  |
| 3                | 8                | 0              | -0.794422               | 1.895031  | 0.000090  |
| 4                | 6                | 0              | 0.342073                | 1.060478  | 0.000061  |
| 5                | 6                | 0              | 0.911559                | 0.700375  | -1.214115 |
| 6                | 6                | 0              | 0.911479                | 0.700179  | 1.214217  |
| 7                | 6                | 0              | 2.078399                | -0.060381 | -1.211055 |
| 8                | 1                | 0              | 0.448643                | 1.006777  | -2.144091 |
| 9                | 6                | 0              | 2.078321                | -0.060575 | 1.211109  |
| 10               | 1                | 0              | 0.448505                | 1.006433  | 2.144212  |
| 11               | 6                | 0              | 2.658058                | -0.441802 | 0.000016  |
| 12               | 1                | 0              | 2.538566                | -0.364891 | -2.143371 |
| 13               | 1                | 0              | 2.538431                | -0.365235 | 2.143405  |
| 14               | 7                | 0              | -2.065832               | -0.014029 | -0.000064 |
| 15               | 6                | 0              | -2.923039               | -0.869375 | -0.000103 |
| 16               | 16               | 0              | -3.935719               | -2.057604 | -0.000161 |
| 17               | 8                | 0              | 3.780836                | -1.243047 | -0.000007 |
| 18               | 6                | 0              | 5.030418                | -0.532145 | -0.000016 |
| 19               | 1                | 0              | 5.121817                | 0.092104  | 0.894031  |
| 20               | 1                | 0              | 5.814386                | -1.287820 | -0.000034 |
| 21               | 1                | 0              | 5.121796                | 0.092123  | -0.894053 |

## Carbncs2.

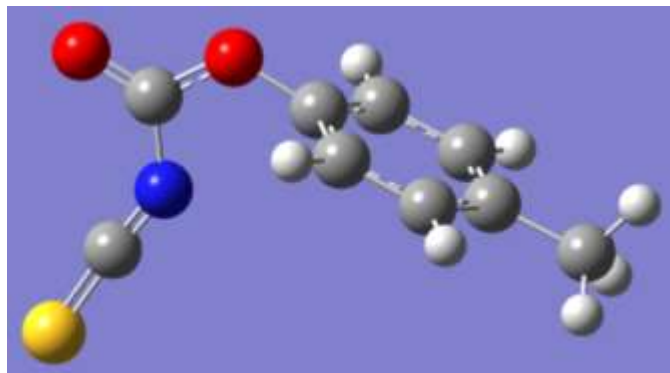

Input orientation:

| Center Number | Atomic Number | Atomic Type | Coordinates (Angstroms) |           |           |
|---------------|---------------|-------------|-------------------------|-----------|-----------|
|               |               |             | X                       | Y         | Z         |
| 1             | 6             | 0           | 1.579346                | 1.419590  | -0.000783 |
| 2             | 8             | 0           | 2.521477                | 2.166944  | -0.001494 |
| 3             | 8             | 0           | 0.319872                | 1.883860  | -0.002692 |
| 4             | 6             | 0           | -0.784836               | 1.005009  | -0.001850 |
| 5             | 6             | 0           | -1.342758               | 0.624321  | 1.210193  |
| 6             | 6             | 0           | -1.340833               | 0.619576  | -1.213270 |
| 7             | 6             | 0           | -2.480096               | -0.180873 | 1.200866  |
| 8             | 1             | 0           | -0.894825               | 0.949385  | 2.141464  |
| 9             | 6             | 0           | -2.478193               | -0.185584 | -1.202593 |
| 10            | 1             | 0           | -0.891424               | 0.940989  | -2.145097 |
| 11            | 6             | 0           | -3.066797               | -0.597869 | -0.000520 |
| 12            | 1             | 0           | -2.916619               | -0.487115 | 2.145314  |
| 13            | 1             | 0           | -2.913216               | -0.495523 | -2.146526 |
| 14            | 7             | 0           | 1.664989                | 0.025931  | 0.002009  |
| 15            | 6             | 0           | 2.554754                | -0.794987 | 0.004315  |
| 16            | 16            | 0           | 3.613393                | -1.943122 | 0.007392  |
| 17            | 6             | 0           | -4.317641               | -1.442396 | 0.000167  |
| 18            | 1             | 0           | -4.367332               | -2.078007 | 0.886666  |
| 19            | 1             | 0           | -5.212357               | -0.810634 | -0.000938 |
| 20            | 1             | 0           | -4.366748               | -2.080322 | -0.884694 |

## Carbncs3.

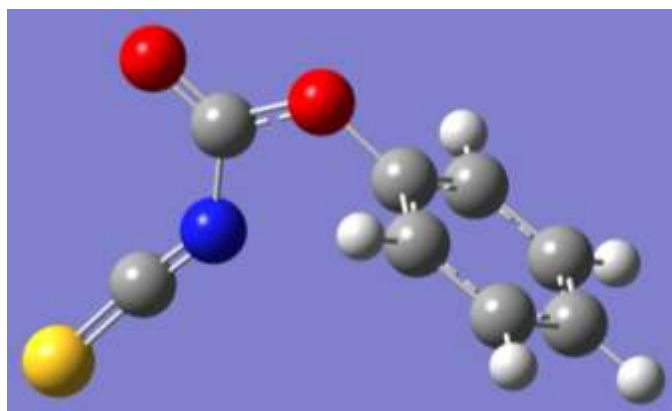

Input orientation:

| Center<br>Number | Atomic<br>Number | Atomic<br>Type | Coordinates (Angstroms) |           |           |
|------------------|------------------|----------------|-------------------------|-----------|-----------|
|                  |                  |                | X                       | Y         | Z         |
| 1                | 6                | 0              | -0.955495               | 1.460184  | 0.000073  |
| 2                | 8                | 0              | -1.756826               | 2.356216  | 0.000127  |
| 3                | 8                | 0              | 0.365323                | 1.706363  | 0.000122  |
| 4                | 6                | 0              | 1.306945                | 0.656203  | 0.000064  |
| 5                | 6                | 0              | 1.789777                | 0.190544  | -1.215798 |
| 6                | 6                | 0              | 1.789700                | 0.190337  | 1.215878  |
| 7                | 6                | 0              | 2.779079                | -0.792306 | -1.208700 |
| 8                | 1                | 0              | 1.400119                | 0.590881  | -2.143740 |
| 9                | 6                | 0              | 2.779002                | -0.792511 | 1.208674  |
| 10               | 1                | 0              | 1.399985                | 0.590517  | 2.143863  |
| 11               | 6                | 0              | 3.272158                | -1.284930 | -0.000039 |
| 12               | 1                | 0              | 3.164821                | -1.168383 | -2.148848 |
| 13               | 1                | 0              | 3.164684                | -1.168749 | 2.148783  |
| 14               | 1                | 0              | 4.042419                | -2.047059 | -0.000080 |
| 15               | 7                | 0              | -1.272800               | 0.101669  | -0.000047 |
| 16               | 6                | 0              | -2.288270               | -0.558127 | -0.000114 |
| 17               | 16               | 0              | -3.523922               | -1.512115 | -0.000208 |

## Carbncs4.

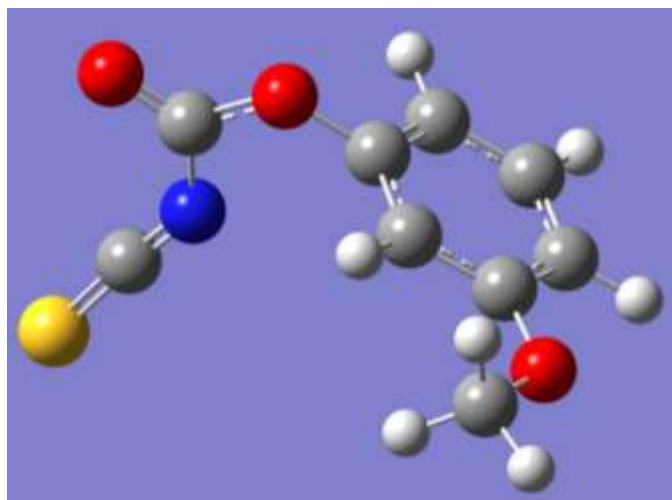

Input orientation:

| Center<br>Number | Atomic<br>Number | Atomic<br>Type | Coordinates (Angstroms) |           |           |
|------------------|------------------|----------------|-------------------------|-----------|-----------|
|                  |                  |                | X                       | Y         | Z         |
| 1                | 6                | 0              | -1.625660               | -1.111571 | -0.937112 |
| 2                | 8                | 0              | -2.475540               | -1.576134 | -1.649527 |
| 3                | 8                | 0              | -0.387672               | -1.631824 | -0.899324 |
| 4                | 6                | 0              | 0.608077                | -1.094694 | -0.056550 |
| 5                | 6                | 0              | 0.741944                | -1.592836 | 1.227759  |
| 6                | 6                | 0              | 1.471117                | -0.148569 | -0.599899 |
| 7                | 6                | 0              | 1.789040                | -1.096868 | 2.010486  |
| 8                | 1                | 0              | 0.055741                | -2.341046 | 1.602626  |
| 9                | 6                | 0              | 2.512648                | 0.332846  | 0.199305  |
| 10               | 1                | 0              | 1.318247                | 0.186548  | -1.615822 |
| 11               | 6                | 0              | 2.666017                | -0.145260 | 1.509390  |
| 12               | 1                | 0              | 1.919594                | -1.463439 | 3.021680  |
| 13               | 1                | 0              | 3.479736                | 0.238020  | 2.112870  |
| 14               | 7                | 0              | -1.801152               | -0.016229 | -0.090728 |
| 15               | 6                | 0              | -2.708568               | 0.736444  | 0.185833  |
| 16               | 16               | 0              | -3.798727               | 1.765482  | 0.621776  |
| 17               | 8                | 0              | 3.420053                | 1.258388  | -0.210890 |
| 18               | 6                | 0              | 3.322402                | 1.775350  | -1.542018 |
| 19               | 1                | 0              | 4.139169                | 2.486738  | -1.642049 |
| 20               | 1                | 0              | 3.438647                | 0.978773  | -2.282140 |
| 21               | 1                | 0              | 2.369447                | 2.289228  | -1.695301 |

## Carbncs5.

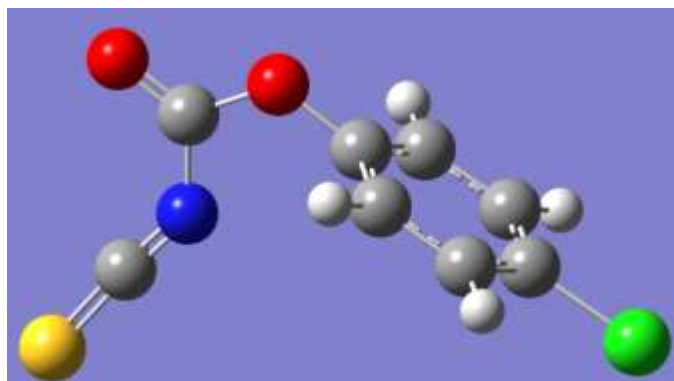

Input orientation:

| Center Number | Atomic Number | Atomic Type | Coordinates (Angstroms) |           |           |
|---------------|---------------|-------------|-------------------------|-----------|-----------|
|               |               |             | X                       | Y         | Z         |
| 1             | 6             | 0           | 2.036443                | -1.360644 | 0.000008  |
| 2             | 8             | 0           | 3.036550                | -2.026272 | 0.000013  |
| 3             | 8             | 0           | 0.819010                | -1.935761 | 0.000017  |
| 4             | 6             | 0           | -0.354152               | -1.160378 | 0.000011  |
| 5             | 6             | 0           | -0.942500               | -0.831240 | -1.213786 |
| 6             | 6             | 0           | -0.942492               | -0.831209 | 1.213803  |
| 7             | 6             | 0           | -2.148145               | -0.133524 | -1.215116 |
| 8             | 1             | 0           | -0.469057               | -1.116257 | -2.144917 |
| 9             | 6             | 0           | -2.148137               | -0.133493 | 1.215123  |
| 10            | 1             | 0           | -0.469043               | -1.116202 | 2.144938  |
| 11            | 6             | 0           | -2.734386               | 0.208853  | 0.000001  |
| 12            | 1             | 0           | -2.622677               | 0.135194  | -2.149630 |
| 13            | 1             | 0           | -2.622663               | 0.135249  | 2.149633  |
| 14            | 7             | 0           | 1.995784                | 0.032494  | -0.000008 |
| 15            | 6             | 0           | 2.815264                | 0.925418  | -0.000019 |
| 16            | 16            | 0           | 3.773592                | 2.156324  | -0.000035 |
| 17            | 17            | 0           | -4.258928               | 1.090801  | -0.000005 |

**Carbncs6.**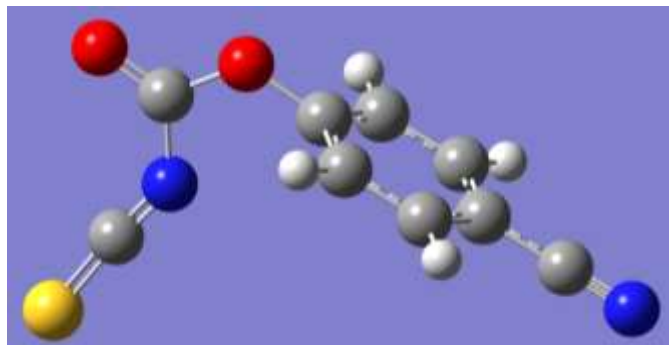

Input orientation:

| Center Number | Atomic Number | Atomic Type | Coordinates (Angstroms) |           |           |
|---------------|---------------|-------------|-------------------------|-----------|-----------|
|               |               |             | X                       | Y         | Z         |
| 1             | 6             | 0           | -1.892842               | -1.347358 | 0.030640  |
| 2             | 8             | 0           | -2.882994               | -2.025894 | 0.052126  |
| 3             | 8             | 0           | -0.666077               | -1.909820 | 0.071290  |
| 4             | 6             | 0           | 0.496272                | -1.127685 | 0.046714  |
| 5             | 6             | 0           | 1.066295                | -0.737019 | 1.252701  |
| 6             | 6             | 0           | 1.093334                | -0.853570 | -1.178164 |
| 7             | 6             | 0           | 2.263383                | -0.032866 | 1.232936  |
| 8             | 1             | 0           | 0.581261                | -0.982834 | 2.188640  |
| 9             | 6             | 0           | 2.290441                | -0.149487 | -1.199284 |
| 10            | 1             | 0           | 0.628922                | -1.188298 | -2.096827 |
| 11            | 6             | 0           | 2.876705                | 0.264179  | 0.006460  |
| 12            | 1             | 0           | 2.722696                | 0.282958  | 2.160559  |
| 13            | 1             | 0           | 2.770563                | 0.076650  | -2.142440 |
| 14            | 7             | 0           | -1.862431               | 0.042903  | -0.035663 |
| 15            | 6             | 0           | -2.696083               | 0.922999  | -0.087175 |
| 16            | 16            | 0           | -3.671081               | 2.136733  | -0.156262 |
| 17            | 6             | 0           | 4.110319                | 0.987764  | -0.014512 |
| 18            | 7             | 0           | 5.107059                | 1.573124  | -0.031492 |



## tsfD11.

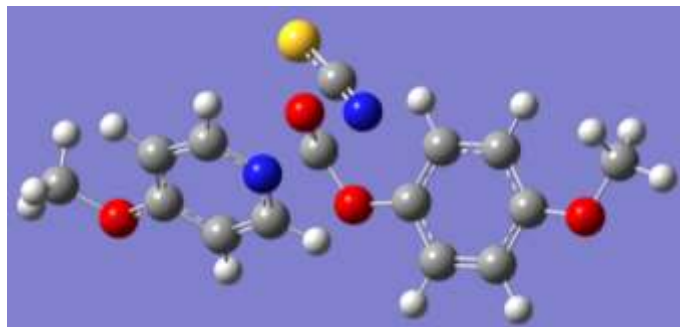

Input orientation:

| Center<br>Number | Atomic<br>Number | Atomic<br>Type | Coordinates (Angstroms) |           |           |
|------------------|------------------|----------------|-------------------------|-----------|-----------|
|                  |                  |                | X                       | Y         | Z         |
| 1                | 6                | 0              | -0.070132               | 0.017509  | 0.710631  |
| 2                | 8                | 0              | 0.099342                | 0.404256  | 1.843266  |
| 3                | 8                | 0              | 0.723991                | -0.885115 | 0.042862  |
| 4                | 6                | 0              | 2.103232                | -0.708607 | 0.018871  |
| 5                | 6                | 0              | 2.821650                | -1.774927 | -0.520919 |
| 6                | 6                | 0              | 2.759132                | 0.431043  | 0.459468  |
| 7                | 6                | 0              | 4.200890                | -1.701132 | -0.622184 |
| 8                | 1                | 0              | 2.288187                | -2.655635 | -0.856898 |
| 9                | 6                | 0              | 4.150522                | 0.503962  | 0.355261  |
| 10               | 1                | 0              | 2.206031                | 1.256114  | 0.879494  |
| 11               | 6                | 0              | 4.876446                | -0.557284 | -0.183888 |
| 12               | 1                | 0              | 4.774706                | -2.519797 | -1.037868 |
| 13               | 1                | 0              | 4.646174                | 1.400016  | 0.701656  |
| 14               | 7                | 0              | -0.083448               | 1.409843  | -0.463610 |
| 15               | 6                | 0              | -1.040099               | 2.106471  | -0.600157 |
| 16               | 16               | 0              | -2.371776               | 2.988876  | -0.776043 |
| 17               | 6                | 0              | -2.466978               | -0.210416 | 1.271052  |
| 18               | 6                | 0              | -1.823002               | -1.037648 | -0.823905 |
| 19               | 6                | 0              | -3.793213               | -0.502706 | 1.024344  |
| 20               | 1                | 0              | -2.106063               | 0.258020  | 2.177127  |
| 21               | 6                | 0              | -3.119172               | -1.351819 | -1.134625 |
| 22               | 1                | 0              | -0.991872               | -1.189882 | -1.494638 |
| 23               | 6                | 0              | -4.137531               | -1.081924 | -0.202326 |
| 24               | 1                | 0              | -4.529494               | -0.253233 | 1.772613  |
| 25               | 1                | 0              | -3.369242               | -1.785209 | -2.092684 |
| 26               | 7                | 0              | -1.515316               | -0.490354 | 0.373032  |
| 27               | 8                | 0              | -5.380550               | -1.396352 | -0.576781 |
| 28               | 6                | 0              | -6.469107               | -1.095312 | 0.305470  |
| 29               | 1                | 0              | -6.523674               | -0.020920 | 0.496589  |
| 30               | 1                | 0              | -7.364074               | -1.422638 | -0.216999 |
| 31               | 1                | 0              | -6.368201               | -1.643980 | 1.245350  |
| 32               | 8                | 0              | 6.236784                | -0.576486 | -0.323542 |
| 33               | 6                | 0              | 6.964764                | 0.567157  | 0.095345  |
| 34               | 1                | 0              | 8.011382                | 0.346301  | -0.107076 |
| 35               | 1                | 0              | 6.665663                | 1.458446  | -0.467163 |
| 36               | 1                | 0              | 6.833416                | 0.753814  | 1.166919  |

tsfD12.

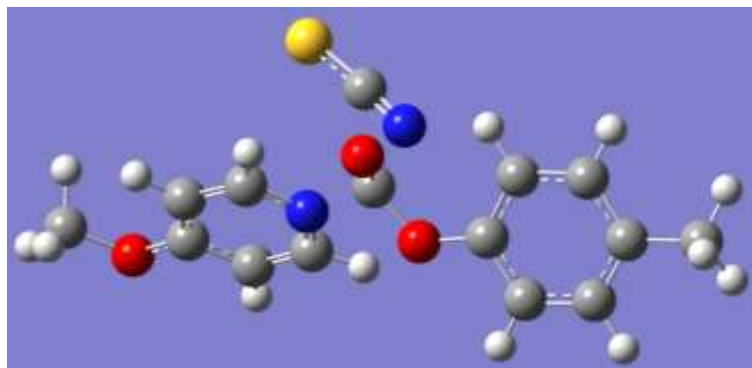

Input orientation:

| Center Number | Atomic Number | Atomic Type | Coordinates (Angstroms) |           |           |
|---------------|---------------|-------------|-------------------------|-----------|-----------|
|               |               |             | X                       | Y         | Z         |
| 1             | 6             | 0           | 0.267129                | 0.039607  | 0.740573  |
| 2             | 8             | 0           | 0.423593                | 0.397412  | 1.883587  |
| 3             | 8             | 0           | 1.088400                | -0.819896 | 0.047522  |
| 4             | 6             | 0           | 2.462006                | -0.613336 | 0.039826  |
| 5             | 6             | 0           | 3.206467                | -1.648415 | -0.517629 |
| 6             | 6             | 0           | 3.086502                | 0.536397  | 0.510748  |
| 7             | 6             | 0           | 4.589061                | -1.533165 | -0.601975 |
| 8             | 1             | 0           | 2.694756                | -2.531088 | -0.881581 |
| 9             | 6             | 0           | 4.473323                | 0.629647  | 0.414722  |
| 10            | 1             | 0           | 2.508923                | 1.340827  | 0.937863  |
| 11            | 6             | 0           | 5.249527                | -0.392937 | -0.134604 |
| 12            | 1             | 0           | 5.161755                | -2.343846 | -1.039924 |
| 13            | 1             | 0           | 4.958440                | 1.529444  | 0.778082  |
| 14            | 7             | 0           | 0.221729                | 1.471583  | -0.398569 |
| 15            | 6             | 0           | -0.754888               | 2.143383  | -0.515303 |
| 16            | 16            | 0           | -2.113783               | 2.989240  | -0.664361 |
| 17            | 6             | 0           | -2.125704               | -0.252598 | 1.276843  |
| 18            | 6             | 0           | -1.449224               | -1.011842 | -0.833979 |
| 19            | 6             | 0           | -3.443553               | -0.565591 | 1.012130  |
| 20            | 1             | 0           | -1.781709               | 0.199897  | 2.197393  |
| 21            | 6             | 0           | -2.736344               | -1.343638 | -1.162866 |
| 22            | 1             | 0           | -0.610478               | -1.129112 | -1.502154 |
| 23            | 6             | 0           | -3.766973               | -1.119034 | -0.231925 |
| 24            | 1             | 0           | -4.190248               | -0.350069 | 1.760554  |
| 25            | 1             | 0           | -2.970462               | -1.756223 | -2.134043 |
| 26            | 7             | 0           | -1.161521               | -0.489884 | 0.379435  |
| 27            | 8             | 0           | -5.000578               | -1.447429 | -0.624656 |
| 28            | 6             | 0           | -6.101972               | -1.188757 | 0.255261  |
| 29            | 1             | 0           | -6.176571               | -0.120982 | 0.474523  |
| 30            | 1             | 0           | -6.986493               | -1.516984 | -0.284146 |
| 31            | 1             | 0           | -6.000015               | -1.760829 | 1.180969  |
| 32            | 6             | 0           | 6.752611                | -0.284794 | -0.194107 |
| 33            | 1             | 0           | 7.072467                | 0.756609  | -0.273325 |
| 34            | 1             | 0           | 7.213813                | -0.702005 | 0.707712  |
| 35            | 1             | 0           | 7.157129                | -0.829397 | -1.050533 |

## tsfD13.

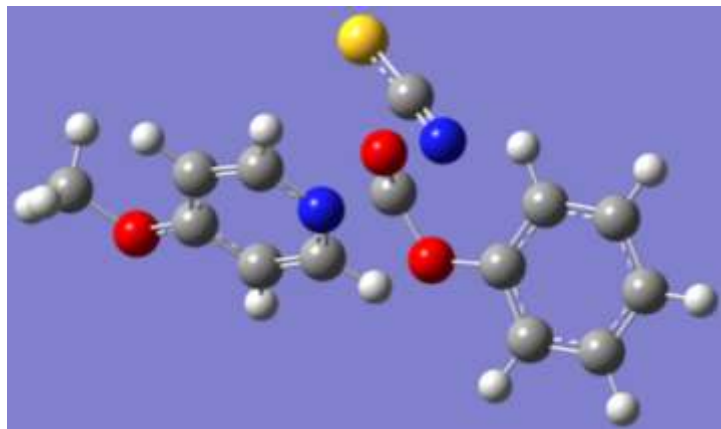

Input orientation:

| Center Number | Atomic Number | Atomic Type | Coordinates (Angstroms) |           |           |
|---------------|---------------|-------------|-------------------------|-----------|-----------|
|               |               |             | X                       | Y         | Z         |
| 1             | 6             | 0           | 0.641820                | 0.047523  | 0.706521  |
| 2             | 8             | 0           | 0.812208                | 0.452928  | 1.830914  |
| 3             | 8             | 0           | 1.452582                | -0.845347 | 0.042177  |
| 4             | 6             | 0           | 2.826210                | -0.650428 | 0.011690  |
| 5             | 6             | 0           | 3.552627                | -1.720606 | -0.505240 |
| 6             | 6             | 0           | 3.460404                | 0.515893  | 0.429191  |
| 7             | 6             | 0           | 4.936000                | -1.624463 | -0.607836 |
| 8             | 1             | 0           | 3.025166                | -2.613204 | -0.818583 |
| 9             | 6             | 0           | 4.847671                | 0.594797  | 0.318208  |
| 10            | 1             | 0           | 2.889356                | 1.338936  | 0.828323  |
| 11            | 6             | 0           | 5.590770                | -0.464614 | -0.195982 |
| 12            | 1             | 0           | 5.500689                | -2.457846 | -1.009259 |
| 13            | 1             | 0           | 5.347114                | 1.501180  | 0.640050  |
| 14            | 1             | 0           | 6.668542                | -0.388500 | -0.274641 |
| 15            | 7             | 0           | 0.601783                | 1.436639  | -0.498075 |
| 16            | 6             | 0           | -0.372104               | 2.109680  | -0.629281 |
| 17            | 16            | 0           | -1.729233               | 2.955919  | -0.793364 |
| 18            | 6             | 0           | -1.747572               | -0.195080 | 1.269436  |
| 19            | 6             | 0           | -1.091979               | -1.048306 | -0.812490 |
| 20            | 6             | 0           | -3.069852               | -0.505823 | 1.025819  |
| 21            | 1             | 0           | -1.393841               | 0.292028  | 2.168273  |
| 22            | 6             | 0           | -2.384253               | -1.380309 | -1.119280 |
| 23            | 1             | 0           | -0.259106               | -1.201240 | -1.480694 |
| 24            | 6             | 0           | -3.406724               | -1.107301 | -0.192112 |
| 25            | 1             | 0           | -3.809573               | -0.251511 | 1.768987  |
| 26            | 1             | 0           | -2.628642               | -1.830076 | -2.071219 |
| 27            | 7             | 0           | -0.791065               | -0.479791 | 0.376999  |
| 28            | 8             | 0           | -4.645604               | -1.439513 | -0.563326 |
| 29            | 6             | 0           | -5.739072               | -1.134025 | 0.311711  |
| 30            | 1             | 0           | -5.802704               | -0.057343 | 0.486151  |
| 31            | 1             | 0           | -6.629873               | -1.476590 | -0.208047 |
| 32            | 1             | 0           | -5.636022               | -1.667642 | 1.259954  |

## tsfD14.

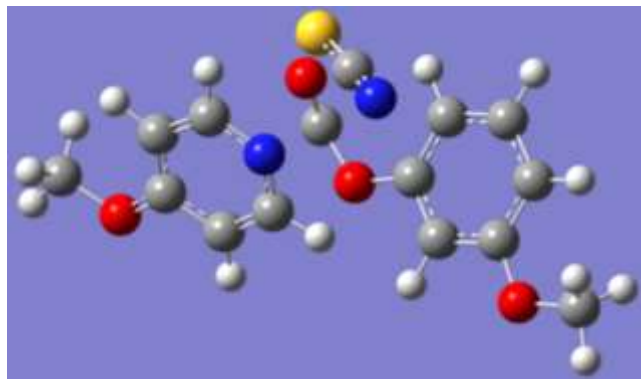

Input orientation:

| Center<br>Number | Atomic<br>Number | Atomic<br>Type | Coordinates (Angstroms) |           |           |
|------------------|------------------|----------------|-------------------------|-----------|-----------|
|                  |                  |                | X                       | Y         | Z         |
| 1                | 6                | 0              | -0.076951               | 0.358435  | 0.822780  |
| 2                | 8                | 0              | -0.059114               | 0.903195  | 1.899848  |
| 3                | 8                | 0              | 0.905514                | -0.462302 | 0.317850  |
| 4                | 6                | 0              | 2.229977                | -0.050851 | 0.314488  |
| 5                | 6                | 0              | 3.126335                | -1.025648 | -0.098814 |
| 6                | 6                | 0              | 2.654103                | 1.230206  | 0.666972  |
| 7                | 6                | 0              | 4.487536                | -0.726624 | -0.167966 |
| 8                | 1                | 0              | 2.778481                | -2.014405 | -0.366909 |
| 9                | 6                | 0              | 4.013747                | 1.505063  | 0.588650  |
| 10               | 1                | 0              | 1.949976                | 1.980443  | 0.987030  |
| 11               | 6                | 0              | 4.941972                | 0.548227  | 0.177380  |
| 12               | 1                | 0              | 4.363373                | 2.495594  | 0.855233  |
| 13               | 7                | 0              | -0.230377               | 1.589223  | -0.538645 |
| 14               | 6                | 0              | -1.274458               | 2.110785  | -0.774909 |
| 15               | 16               | 0              | -2.719939               | 2.749221  | -1.073855 |
| 16               | 6                | 0              | -2.450452               | -0.164911 | 1.241818  |
| 17               | 6                | 0              | -1.497870               | -1.170827 | -0.648393 |
| 18               | 6                | 0              | -3.689282               | -0.699300 | 0.952129  |
| 19               | 1                | 0              | -2.250408               | 0.479746  | 2.087142  |
| 20               | 6                | 0              | -2.698502               | -1.730227 | -0.995032 |
| 21               | 1                | 0              | -0.595164               | -1.282695 | -1.228127 |
| 22               | 6                | 0              | -3.828250               | -1.496098 | -0.189729 |
| 23               | 1                | 0              | -4.520917               | -0.465164 | 1.598385  |
| 24               | 1                | 0              | -2.790956               | -2.331872 | -1.888185 |
| 25               | 7                | 0              | -1.386881               | -0.415486 | 0.467819  |
| 26               | 8                | 0              | -4.970826               | -2.055246 | -0.596909 |
| 27               | 6                | 0              | -6.170714               | -1.802259 | 0.144991  |
| 28               | 1                | 0              | -6.394841               | -0.732990 | 0.159859  |
| 29               | 1                | 0              | -6.955816               | -2.336526 | -0.383448 |
| 30               | 1                | 0              | -6.083482               | -2.186707 | 1.164413  |
| 31               | 1                | 0              | 5.990934                | 0.803306  | 0.131911  |
| 32               | 8                | 0              | 5.292371                | -1.748445 | -0.584798 |
| 33               | 6                | 0              | 6.688238                | -1.504995 | -0.675512 |
| 34               | 1                | 0              | 7.111619                | -1.242759 | 0.299999  |
| 35               | 1                | 0              | 7.131189                | -2.436717 | -1.022991 |
| 36               | 1                | 0              | 6.908347                | -0.707707 | -1.393502 |

tsfD15.

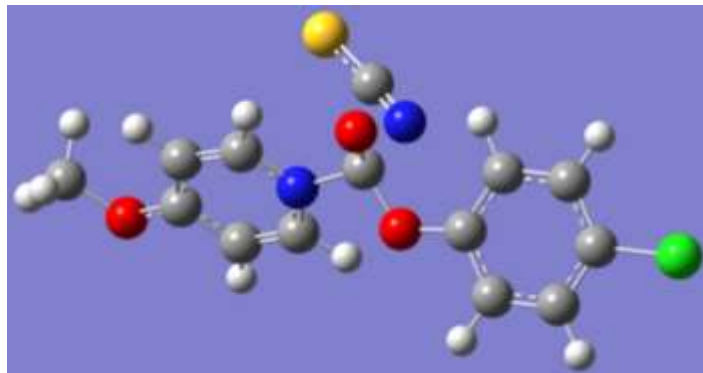

Input orientation:

| Center Number | Atomic Number | Atomic Type | Coordinates (Angstroms) |           |           |
|---------------|---------------|-------------|-------------------------|-----------|-----------|
|               |               |             | X                       | Y         | Z         |
| 1             | 6             | 0           | -0.076732               | 0.078595  | 0.703978  |
| 2             | 8             | 0           | 0.089189                | 0.479720  | 1.830140  |
| 3             | 8             | 0           | 0.761117                | -0.786569 | 0.031160  |
| 4             | 6             | 0           | 2.127073                | -0.557908 | 0.027545  |
| 5             | 6             | 0           | 2.896939                | -1.620079 | -0.439075 |
| 6             | 6             | 0           | 2.722284                | 0.636931  | 0.421786  |
| 7             | 6             | 0           | 4.278867                | -1.495042 | -0.517403 |
| 8             | 1             | 0           | 2.407057                | -2.538630 | -0.736917 |
| 9             | 6             | 0           | 4.107335                | 0.759094  | 0.342965  |
| 10            | 1             | 0           | 2.123435                | 1.458624  | 0.780809  |
| 11            | 6             | 0           | 4.873801                | -0.301498 | -0.123440 |
| 12            | 1             | 0           | 4.585204                | 1.681761  | 0.644514  |
| 13            | 7             | 0           | -0.142174               | 1.483370  | -0.495903 |
| 14            | 6             | 0           | -1.133308               | 2.134382  | -0.611313 |
| 15            | 16            | 0           | -2.512678               | 2.947181  | -0.752248 |
| 16            | 6             | 0           | -2.455036               | -0.219621 | 1.261758  |
| 17            | 6             | 0           | -1.777391               | -1.033223 | -0.830283 |
| 18            | 6             | 0           | -3.769475               | -0.555532 | 1.011345  |
| 19            | 1             | 0           | -2.114172               | 0.264189  | 2.167165  |
| 20            | 6             | 0           | -3.061545               | -1.388257 | -1.143392 |
| 21            | 1             | 0           | -0.941009               | -1.159136 | -1.499588 |
| 22            | 6             | 0           | -4.091561               | -1.148650 | -0.214839 |
| 23            | 1             | 0           | -4.515705               | -0.325843 | 1.755957  |
| 24            | 1             | 0           | -3.294748               | -1.830528 | -2.101616 |
| 25            | 7             | 0           | -1.490339               | -0.473526 | 0.367636  |
| 26            | 8             | 0           | -5.321762               | -1.501339 | -0.592987 |
| 27            | 6             | 0           | -6.424318               | -1.229376 | 0.282497  |
| 28            | 1             | 0           | -6.509726               | -0.156596 | 0.470742  |
| 29            | 1             | 0           | -7.306186               | -1.582658 | -0.245143 |
| 30            | 1             | 0           | -6.313493               | -1.773721 | 1.223667  |
| 31            | 1             | 0           | 4.885832                | -2.314998 | -0.877600 |
| 32            | 17            | 0           | 6.622852                | -0.134780 | -0.216115 |

tsfD16.

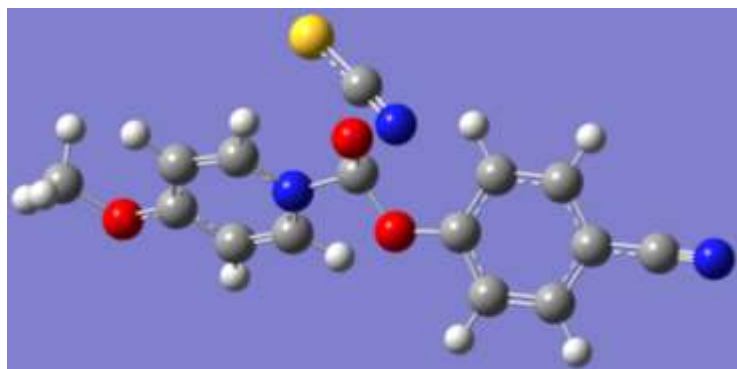

Input orientation:

| Center Number | Atomic Number | Atomic Type | Coordinates (Angstroms) |           |           |
|---------------|---------------|-------------|-------------------------|-----------|-----------|
|               |               |             | X                       | Y         | Z         |
| 1             | 6             | 0           | 0.056454                | 0.059840  | 0.731873  |
| 2             | 8             | 0           | 0.222105                | 0.496082  | 1.843072  |
| 3             | 8             | 0           | 0.902973                | -0.823013 | 0.085806  |
| 4             | 6             | 0           | 2.260639                | -0.588303 | 0.065469  |
| 5             | 6             | 0           | 3.027526                | -1.653519 | -0.407131 |
| 6             | 6             | 0           | 2.855437                | 0.611949  | 0.451226  |
| 7             | 6             | 0           | 4.403345                | -1.525088 | -0.498214 |
| 8             | 1             | 0           | 2.532685                | -2.571811 | -0.696458 |
| 9             | 6             | 0           | 4.235119                | 0.734378  | 0.357023  |
| 10            | 1             | 0           | 2.255197                | 1.431567  | 0.811601  |
| 11            | 6             | 0           | 5.020146                | -0.325537 | -0.114869 |
| 12            | 1             | 0           | 4.710948                | 1.661312  | 0.650392  |
| 13            | 7             | 0           | 0.025654                | 1.450209  | -0.533774 |
| 14            | 6             | 0           | -0.963105               | 2.106085  | -0.641862 |
| 15            | 16            | 0           | -2.344412               | 2.919520  | -0.763625 |
| 16            | 6             | 0           | -2.325875               | -0.177499 | 1.259668  |
| 17            | 6             | 0           | -1.624658               | -1.064928 | -0.796659 |
| 18            | 6             | 0           | -3.639924               | -0.502428 | 0.996326  |
| 19            | 1             | 0           | -1.995430               | 0.328509  | 2.156405  |
| 20            | 6             | 0           | -2.908147               | -1.409336 | -1.120444 |
| 21            | 1             | 0           | -0.780564               | -1.221908 | -1.449055 |
| 22            | 6             | 0           | -3.950510               | -1.127400 | -0.216988 |
| 23            | 1             | 0           | -4.395102               | -0.237892 | 1.720039  |
| 24            | 1             | 0           | -3.131959               | -1.875590 | -2.069475 |
| 25            | 7             | 0           | -1.348132               | -0.475032 | 0.390965  |
| 26            | 8             | 0           | -5.178036               | -1.472712 | -0.605855 |
| 27            | 6             | 0           | -6.292533               | -1.159520 | 0.241464  |
| 28            | 1             | 0           | -6.365281               | -0.080563 | 0.396142  |
| 29            | 1             | 0           | -7.169566               | -1.516055 | -0.291838 |
| 30            | 1             | 0           | -6.205763               | -1.677645 | 1.199694  |
| 31            | 1             | 0           | 5.005601                | -2.347161 | -0.862811 |
| 32            | 6             | 0           | 6.438578                | -0.188597 | -0.205046 |
| 33            | 7             | 0           | 7.587096                | -0.081427 | -0.279135 |

tsfD21.

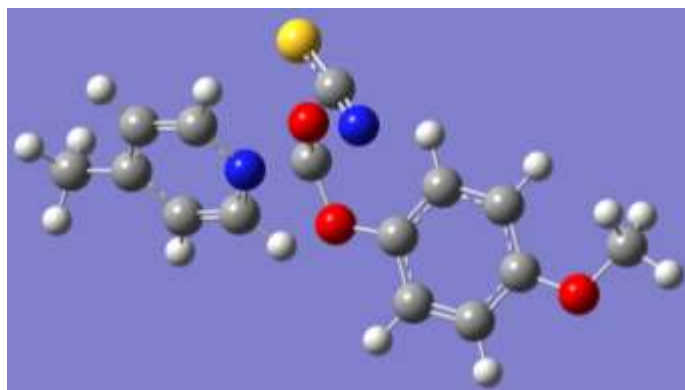

Input orientation:

| Center Number | Atomic Number | Atomic Type | Coordinates (Angstroms) |           |           |
|---------------|---------------|-------------|-------------------------|-----------|-----------|
|               |               |             | X                       | Y         | Z         |
| 1             | 6             | 0           | -0.369835               | -0.013885 | 0.744378  |
| 2             | 8             | 0           | -0.199709               | 0.418311  | 1.858564  |
| 3             | 8             | 0           | 0.442976                | -0.906763 | 0.091578  |
| 4             | 6             | 0           | 1.816214                | -0.685274 | 0.042463  |
| 5             | 6             | 0           | 2.563362                | -1.746108 | -0.467740 |
| 6             | 6             | 0           | 2.437169                | 0.491906  | 0.431317  |
| 7             | 6             | 0           | 3.937808                | -1.629015 | -0.591335 |
| 8             | 1             | 0           | 2.056375                | -2.656460 | -0.763211 |
| 9             | 6             | 0           | 3.823655                | 0.608242  | 0.304796  |
| 10            | 1             | 0           | 1.861186                | 1.313181  | 0.827390  |
| 11            | 6             | 0           | 4.578899                | -0.447072 | -0.205204 |
| 12            | 1             | 0           | 4.534246                | -2.442556 | -0.984574 |
| 13            | 1             | 0           | 4.292386                | 1.533008  | 0.610699  |
| 14            | 7             | 0           | -0.454263               | 1.342728  | -0.480584 |
| 15            | 6             | 0           | -1.457030               | 1.949513  | -0.692474 |
| 16            | 16            | 0           | -2.848440               | 2.705434  | -0.969715 |
| 17            | 6             | 0           | -2.753705               | -0.304350 | 1.348995  |
| 18            | 6             | 0           | -2.109576               | -1.173956 | -0.727619 |
| 19            | 6             | 0           | -4.070363               | -0.654082 | 1.115872  |
| 20            | 1             | 0           | -2.394814               | 0.202513  | 2.234758  |
| 21            | 6             | 0           | -3.408536               | -1.536909 | -1.005629 |
| 22            | 1             | 0           | -1.282073               | -1.321911 | -1.404043 |
| 23            | 6             | 0           | -4.428603               | -1.278609 | -0.079450 |
| 24            | 1             | 0           | -4.815552               | -0.417896 | 1.864077  |
| 25            | 1             | 0           | -3.629070               | -2.010234 | -1.953713 |
| 26            | 7             | 0           | -1.807782               | -0.580281 | 0.442087  |
| 27            | 8             | 0           | 5.936751                | -0.424765 | -0.363524 |
| 28            | 6             | 0           | 6.630322                | 0.757780  | 0.003209  |
| 29            | 1             | 0           | 6.506106                | 0.979197  | 1.068949  |
| 30            | 1             | 0           | 7.681205                | 0.565071  | -0.205569 |
| 31            | 1             | 0           | 6.293587                | 1.616811  | -0.587409 |
| 32            | 6             | 0           | -5.856998               | -1.612908 | -0.390939 |
| 33            | 1             | 0           | -6.295151               | -0.815657 | -1.000707 |
| 34            | 1             | 0           | -5.933344               | -2.541529 | -0.959517 |
| 35            | 1             | 0           | -6.454196               | -1.704987 | 0.516922  |

tsfD22.

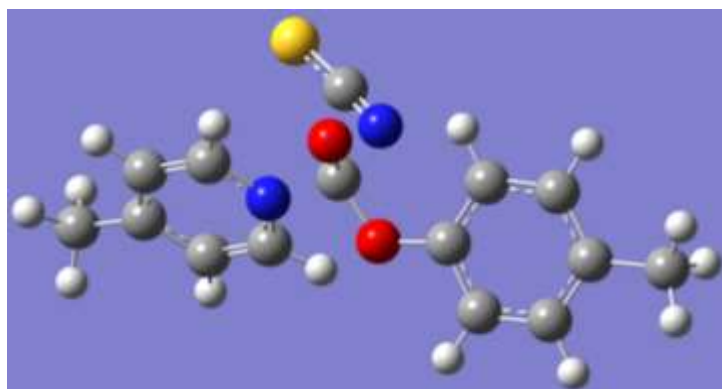

Input orientation:

| Center Number | Atomic Number | Atomic Type | Coordinates (Angstroms) |           |           |
|---------------|---------------|-------------|-------------------------|-----------|-----------|
|               |               |             | X                       | Y         | Z         |
| 1             | 6             | 0           | -0.032373               | 0.003359  | 0.788964  |
| 2             | 8             | 0           | 0.113841                | 0.419444  | 1.911654  |
| 3             | 8             | 0           | 0.818368                | -0.843847 | 0.122837  |
| 4             | 6             | 0           | 2.181291                | -0.572687 | 0.082364  |
| 5             | 6             | 0           | 2.964202                | -1.591724 | -0.450667 |
| 6             | 6             | 0           | 2.758478                | 0.617956  | 0.509493  |
| 7             | 6             | 0           | 4.338782                | -1.416393 | -0.560317 |
| 8             | 1             | 0           | 2.489705                | -2.512021 | -0.768935 |
| 9             | 6             | 0           | 4.137971                | 0.770924  | 0.388791  |
| 10            | 1             | 0           | 2.151845                | 1.405499  | 0.927702  |
| 11            | 6             | 0           | 4.951788                | -0.230388 | -0.145379 |
| 12            | 1             | 0           | 4.942945                | -2.217395 | -0.972944 |
| 13            | 1             | 0           | 4.587268                | 1.699746  | 0.723920  |
| 14            | 7             | 0           | -0.153906               | 1.388852  | -0.417451 |
| 15            | 6             | 0           | -1.177366               | 1.962978  | -0.619838 |
| 16            | 16            | 0           | -2.596290               | 2.672128  | -0.884145 |
| 17            | 6             | 0           | -2.411697               | -0.365272 | 1.356140  |
| 18            | 6             | 0           | -1.713357               | -1.185629 | -0.723448 |
| 19            | 6             | 0           | -3.713619               | -0.751489 | 1.099854  |
| 20            | 1             | 0           | -2.080925               | 0.139685  | 2.253747  |
| 21            | 6             | 0           | -2.996828               | -1.583336 | -1.024283 |
| 22            | 1             | 0           | -0.872984               | -1.298677 | -1.390541 |
| 23            | 6             | 0           | -4.036667               | -1.369540 | -0.108697 |
| 24            | 1             | 0           | -4.475629               | -0.548229 | 1.840726  |
| 25            | 1             | 0           | -3.190060               | -2.049415 | -1.981862 |
| 26            | 7             | 0           | -1.445219               | -0.599972 | 0.458814  |
| 27            | 6             | 0           | 6.438808                | -0.028708 | -0.295566 |
| 28            | 1             | 0           | 6.830264                | 0.632187  | 0.481035  |
| 29            | 1             | 0           | 6.976912                | -0.977558 | -0.235370 |
| 30            | 1             | 0           | 6.678941                | 0.424407  | -1.263515 |
| 31            | 6             | 0           | -5.450005               | -1.741882 | -0.444336 |
| 32            | 1             | 0           | -5.903954               | -0.948959 | -1.048200 |
| 33            | 1             | 0           | -5.491070               | -2.663754 | -1.027345 |
| 34            | 1             | 0           | -6.055937               | -1.865218 | 0.453989  |



tsfD23.

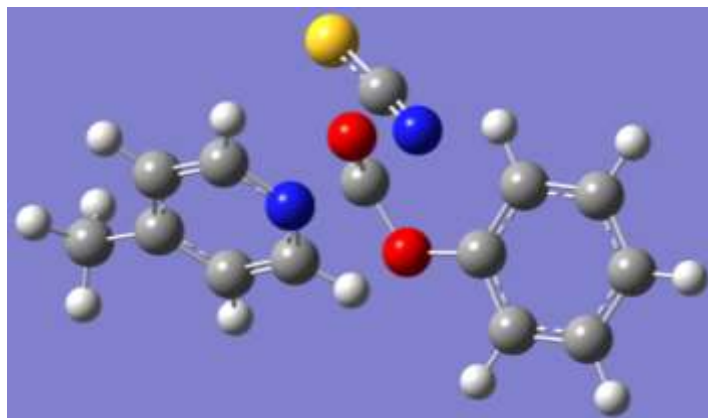

Input orientation:

| Center<br>Number | Atomic<br>Number | Atomic<br>Type | Coordinates (Angstroms) |           |           |
|------------------|------------------|----------------|-------------------------|-----------|-----------|
|                  |                  |                | X                       | Y         | Z         |
| 1                | 6                | 0              | 0.350514                | 0.027223  | 0.739331  |
| 2                | 8                | 0              | 0.517176                | 0.468117  | 1.849128  |
| 3                | 8                | 0              | 1.194575                | -0.829436 | 0.074494  |
| 4                | 6                | 0              | 2.555429                | -0.558887 | 0.011410  |
| 5                | 6                | 0              | 3.330007                | -1.598785 | -0.496655 |
| 6                | 6                | 0              | 3.130028                | 0.650765  | 0.389201  |
| 7                | 6                | 0              | 4.703507                | -1.427777 | -0.630317 |
| 8                | 1                | 0              | 2.847602                | -2.526617 | -0.778613 |
| 9                | 6                | 0              | 4.508249                | 0.804272  | 0.247826  |
| 10               | 1                | 0              | 2.521360                | 1.450231  | 0.780661  |
| 11               | 6                | 0              | 5.299533                | -0.223682 | -0.258283 |
| 12               | 1                | 0              | 5.306366                | -2.237381 | -1.024738 |
| 13               | 1                | 0              | 4.962084                | 1.744418  | 0.538769  |
| 14               | 1                | 0              | 6.369514                | -0.089190 | -0.361143 |
| 15               | 7                | 0              | 0.202887                | 1.390951  | -0.498949 |
| 16               | 6                | 0              | -0.826200               | 1.962266  | -0.679992 |
| 17               | 16               | 0              | -2.253376               | 2.666220  | -0.911357 |
| 18               | 6                | 0              | -2.015970               | -0.330175 | 1.352960  |
| 19               | 6                | 0              | -1.349371               | -1.195857 | -0.719208 |
| 20               | 6                | 0              | -3.320741               | -0.725032 | 1.126617  |
| 21               | 1                | 0              | -1.672410               | 0.195786  | 2.233447  |
| 22               | 6                | 0              | -2.636537               | -1.602616 | -0.989825 |
| 23               | 1                | 0              | -0.520004               | -1.321926 | -1.397556 |
| 24               | 6                | 0              | -3.661903               | -1.371028 | -0.062116 |
| 25               | 1                | 0              | -4.070963               | -0.506367 | 1.875061  |
| 26               | 1                | 0              | -2.844182               | -2.090419 | -1.933450 |
| 27               | 7                | 0              | -1.063202               | -0.583557 | 0.445601  |
| 28               | 6                | 0              | -5.079406               | -1.754450 | -0.365869 |
| 29               | 1                | 0              | -5.546133               | -0.975436 | -0.978062 |
| 30               | 1                | 0              | -5.127250               | -2.688218 | -0.929078 |
| 31               | 1                | 0              | -5.669606               | -1.861031 | 0.544966  |

tsfD24.

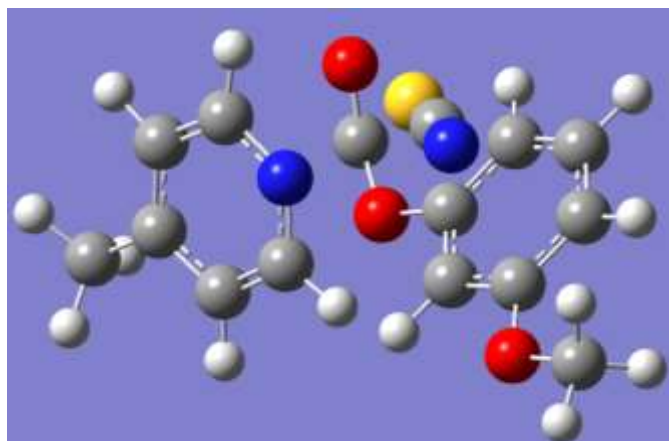

Input orientation:

| Center Number | Atomic Number | Atomic Type | Coordinates (Angstroms) |           |           |
|---------------|---------------|-------------|-------------------------|-----------|-----------|
|               |               |             | X                       | Y         | Z         |
| 1             | 6             | 0           | -0.364728               | 0.325949  | 0.759565  |
| 2             | 8             | 0           | -0.324114               | 0.872324  | 1.833249  |
| 3             | 8             | 0           | 0.637992                | -0.427439 | 0.196889  |
| 4             | 6             | 0           | 1.944344                | 0.043098  | 0.195509  |
| 5             | 6             | 0           | 2.897613                | -0.918963 | -0.102181 |
| 6             | 6             | 0           | 2.293218                | 1.371711  | 0.434797  |
| 7             | 6             | 0           | 4.244165                | -0.557280 | -0.167047 |
| 8             | 1             | 0           | 2.606440                | -1.945497 | -0.280714 |
| 9             | 6             | 0           | 3.639302                | 1.708099  | 0.364995  |
| 10            | 1             | 0           | 1.542446                | 2.110753  | 0.662018  |
| 11            | 6             | 0           | 4.624630                | 0.765831  | 0.068162  |
| 12            | 1             | 0           | 3.932455                | 2.735595  | 0.545830  |
| 13            | 1             | 0           | 5.660731                | 1.069398  | 0.025061  |
| 14            | 7             | 0           | -0.686468               | 1.542417  | -0.590133 |
| 15            | 6             | 0           | -1.786741               | 1.922625  | -0.841463 |
| 16            | 16            | 0           | -3.299035               | 2.363875  | -1.163981 |
| 17            | 6             | 0           | -2.657537               | -0.397780 | 1.335174  |
| 18            | 6             | 0           | -1.771514               | -1.271981 | -0.649467 |
| 19            | 6             | 0           | -3.863856               | -1.032351 | 1.106035  |
| 20            | 1             | 0           | -2.444365               | 0.239219  | 2.183042  |
| 21            | 6             | 0           | -2.956275               | -1.918283 | -0.921556 |
| 22            | 1             | 0           | -0.906905               | -1.296935 | -1.294443 |
| 23            | 6             | 0           | -4.040998               | -1.807846 | -0.040167 |
| 24            | 1             | 0           | -4.669179               | -0.899431 | 1.816378  |
| 25            | 1             | 0           | -3.039320               | -2.499988 | -1.830539 |
| 26            | 7             | 0           | -1.641819               | -0.540346 | 0.473547  |
| 27            | 8             | 0           | 5.110136                | -1.570507 | -0.464194 |
| 28            | 6             | 0           | 6.495977                | -1.267786 | -0.529257 |
| 29            | 1             | 0           | 6.867611                | -0.893617 | 0.430674  |
| 30            | 1             | 0           | 6.994562                | -2.205160 | -0.769551 |
| 31            | 1             | 0           | 6.707427                | -0.532260 | -1.312751 |
| 32            | 6             | 0           | -5.357285               | -2.455064 | -0.352121 |
| 33            | 1             | 0           | -5.920263               | -1.822205 | -1.046373 |
| 34            | 1             | 0           | -5.219426               | -3.426385 | -0.830689 |
| 35            | 1             | 0           | -5.962346               | -2.586285 | 0.545641  |

-----

tsfD25.

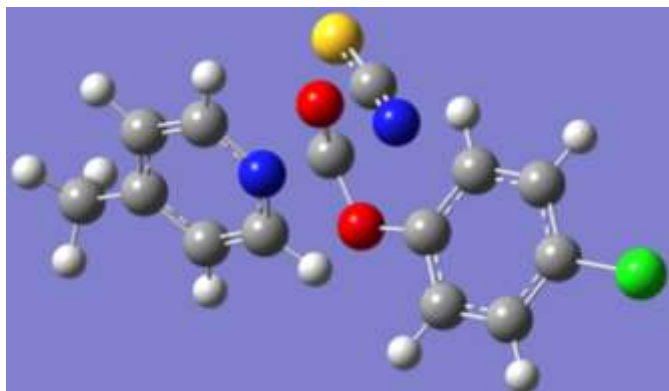

Input orientation:

| Center Number | Atomic Number | Atomic Type | Coordinates (Angstroms) |           |           |
|---------------|---------------|-------------|-------------------------|-----------|-----------|
|               |               |             | X                       | Y         | Z         |
| 1             | 6             | 0           | -0.353924               | 0.068160  | 0.742168  |
| 2             | 8             | 0           | -0.180367               | 0.499022  | 1.854448  |
| 3             | 8             | 0           | 0.494374                | -0.780480 | 0.066886  |
| 4             | 6             | 0           | 1.854145                | -0.512945 | 0.035802  |
| 5             | 6             | 0           | 2.647362                | -1.566048 | -0.410959 |
| 6             | 6             | 0           | 2.418507                | 0.710469  | 0.384271  |
| 7             | 6             | 0           | 4.023661                | -1.402998 | -0.514909 |
| 8             | 1             | 0           | 2.180514                | -2.507245 | -0.672873 |
| 9             | 6             | 0           | 3.797978                | 0.870486  | 0.280078  |
| 10            | 1             | 0           | 1.800632                | 1.525220  | 0.726630  |
| 11            | 6             | 0           | 4.588592                | -0.181050 | -0.166369 |
| 12            | 1             | 0           | 4.649344                | -2.215418 | -0.859739 |
| 13            | 1             | 0           | 4.252751                | 1.815482  | 0.546045  |
| 14            | 7             | 0           | -0.494700               | 1.450855  | -0.488785 |
| 15            | 6             | 0           | -1.524397               | 2.028389  | -0.647940 |
| 16            | 16            | 0           | -2.952859               | 2.737905  | -0.847688 |
| 17            | 6             | 0           | -2.715425               | -0.288326 | 1.352352  |
| 18            | 6             | 0           | -2.050156               | -1.127512 | -0.732365 |
| 19            | 6             | 0           | -4.020727               | -0.677302 | 1.120045  |
| 20            | 1             | 0           | -2.371621               | 0.224826  | 2.240119  |
| 21            | 6             | 0           | -3.338024               | -1.527141 | -1.008309 |
| 22            | 1             | 0           | -1.221670               | -1.245486 | -1.413092 |
| 23            | 6             | 0           | -4.363208               | -1.306083 | -0.077484 |
| 24            | 1             | 0           | -4.770542               | -0.466994 | 1.871239  |
| 25            | 1             | 0           | -3.546666               | -2.000998 | -1.958769 |
| 26            | 7             | 0           | -1.762403               | -0.532197 | 0.441642  |
| 27            | 17            | 0           | 6.329955                | 0.033909  | -0.291579 |
| 28            | 6             | 0           | -5.781355               | -1.681663 | -0.386867 |
| 29            | 1             | 0           | -6.244877               | -0.894016 | -0.990438 |
| 30            | 1             | 0           | -5.831534               | -2.608524 | -0.961126 |
| 31            | 1             | 0           | -6.372788               | -1.796852 | 0.522072  |

-----

tsfD26.

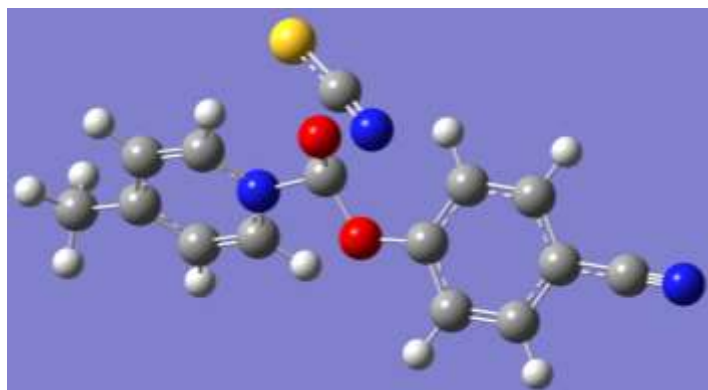

Input orientation:

| Center<br>Number | Atomic<br>Number | Atomic<br>Type | Coordinates (Angstroms) |           |           |
|------------------|------------------|----------------|-------------------------|-----------|-----------|
|                  |                  |                | X                       | Y         | Z         |
| 1                | 6                | 0              | -0.237848               | -0.039655 | 0.791729  |
| 2                | 8                | 0              | -0.063680               | 0.347326  | 1.918240  |
| 3                | 8                | 0              | 0.623764                | -0.849387 | 0.079005  |
| 4                | 6                | 0              | 1.972334                | -0.562059 | 0.045404  |
| 5                | 6                | 0              | 2.769481                | -1.576942 | -0.483546 |
| 6                | 6                | 0              | 2.527090                | 0.644256  | 0.469031  |
| 7                | 6                | 0              | 4.137447                | -1.391202 | -0.593621 |
| 8                | 1                | 0              | 2.304725                | -2.501736 | -0.800665 |
| 9                | 6                | 0              | 3.899071                | 0.824118  | 0.355765  |
| 10               | 1                | 0              | 1.902639                | 1.425222  | 0.871758  |
| 11               | 6                | 0              | 4.714784                | -0.184713 | -0.172636 |
| 12               | 1                | 0              | 4.763792                | -2.173913 | -1.001609 |
| 13               | 1                | 0              | 4.344595                | 1.756494  | 0.677987  |
| 14               | 7                | 0              | -0.363848               | 1.416395  | -0.403115 |
| 15               | 6                | 0              | -1.394918               | 2.006231  | -0.494389 |
| 16               | 16               | 0              | -2.829527               | 2.724456  | -0.597664 |
| 17               | 6                | 0              | -2.599874               | -0.396046 | 1.359250  |
| 18               | 6                | 0              | -1.912112               | -1.154445 | -0.751168 |
| 19               | 6                | 0              | -3.903473               | -0.768428 | 1.094508  |
| 20               | 1                | 0              | -2.266874               | 0.077872  | 2.272232  |
| 21               | 6                | 0              | -3.198204               | -1.533891 | -1.058327 |
| 22               | 1                | 0              | -1.077163               | -1.248411 | -1.427270 |
| 23               | 6                | 0              | -4.234236               | -1.346066 | -0.131491 |
| 24               | 1                | 0              | -4.661376               | -0.583227 | 1.844089  |
| 25               | 1                | 0              | -3.397428               | -1.966620 | -2.030126 |
| 26               | 7                | 0              | -1.634691               | -0.610732 | 0.451725  |
| 27               | 6                | 0              | 6.124984                | 0.011156  | -0.282337 |
| 28               | 7                | 0              | 7.266819                | 0.166134  | -0.372545 |
| 29               | 6                | 0              | -5.649951               | -1.700602 | -0.473243 |
| 30               | 1                | 0              | -5.697286               | -2.595008 | -1.096913 |
| 31               | 1                | 0              | -6.250062               | -1.862038 | 0.422856  |
| 32               | 1                | 0              | -6.105672               | -0.879979 | -1.037704 |

tsfD31.

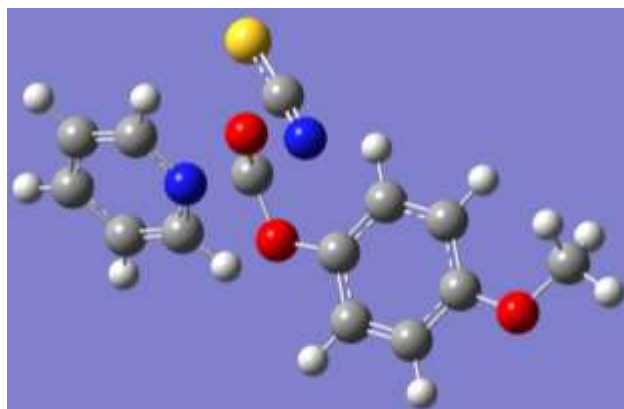

Input orientation:

| Center Number | Atomic Number | Atomic Type | Coordinates (Angstroms) |           |           |
|---------------|---------------|-------------|-------------------------|-----------|-----------|
|               |               |             | X                       | Y         | Z         |
| 1             | 6             | 0           | -0.693751               | -0.137637 | 0.649700  |
| 2             | 8             | 0           | -0.558709               | 0.287276  | 1.770194  |
| 3             | 8             | 0           | 0.178144                | -0.958017 | -0.015966 |
| 4             | 6             | 0           | 1.540317                | -0.663668 | -0.010776 |
| 5             | 6             | 0           | 2.370573                | -1.707947 | -0.413722 |
| 6             | 6             | 0           | 2.071030                | 0.571713  | 0.326379  |
| 7             | 6             | 0           | 3.740575                | -1.515356 | -0.481619 |
| 8             | 1             | 0           | 1.932196                | -2.664659 | -0.669749 |
| 9             | 6             | 0           | 3.453032                | 0.763274  | 0.259252  |
| 10            | 1             | 0           | 1.428560                | 1.381125  | 0.635659  |
| 11            | 6             | 0           | 4.292422                | -0.274992 | -0.143656 |
| 12            | 1             | 0           | 4.402021                | -2.314586 | -0.791260 |
| 13            | 1             | 0           | 3.851815                | 1.732042  | 0.525339  |
| 14            | 7             | 0           | -0.886395               | 1.235380  | -0.557007 |
| 15            | 6             | 0           | -1.916588               | 1.825759  | -0.657202 |
| 16            | 16            | 0           | -3.344534               | 2.552298  | -0.774238 |
| 17            | 6             | 0           | -3.065202               | -0.561393 | 1.220266  |
| 18            | 6             | 0           | -2.333226               | -1.421710 | -0.838774 |
| 19            | 6             | 0           | -4.354525               | -1.007311 | 0.980685  |
| 20            | 1             | 0           | -2.748292               | -0.016838 | 2.099533  |
| 21            | 6             | 0           | -3.601649               | -1.883387 | -1.127075 |
| 22            | 1             | 0           | -1.485901               | -1.518752 | -1.499510 |
| 23            | 6             | 0           | -4.627456               | -1.680258 | -0.203364 |
| 24            | 1             | 0           | -5.126700               | -0.810679 | 1.711400  |
| 25            | 1             | 0           | -3.780853               | -2.387908 | -2.066628 |
| 26            | 1             | 0           | -5.630101               | -2.029674 | -0.416091 |
| 27            | 7             | 0           | -2.094210               | -0.792820 | 0.326843  |
| 28            | 8             | 0           | 5.652580                | -0.180944 | -0.238528 |
| 29            | 6             | 0           | 6.259432                | 1.060343  | 0.086522  |
| 30            | 1             | 0           | 6.067793                | 1.337182  | 1.128992  |
| 31            | 1             | 0           | 7.328747                | 0.917178  | -0.058575 |
| 32            | 1             | 0           | 5.906941                | 1.861215  | -0.572612 |

tsfD32.

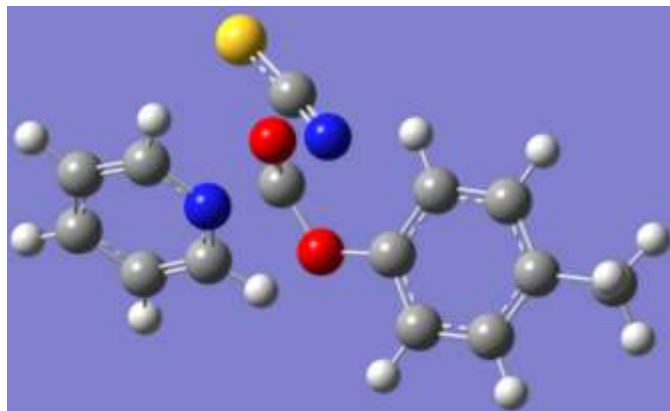

Input orientation:

| Center Number | Atomic Number | Atomic Type | Coordinates (Angstroms) |           |           |
|---------------|---------------|-------------|-------------------------|-----------|-----------|
|               |               |             | X                       | Y         | Z         |
| 1             | 6             | 0           | -0.340923               | -0.054700 | 0.679400  |
| 2             | 8             | 0           | -0.223177               | 0.350887  | 1.808282  |
| 3             | 8             | 0           | 0.567889                | -0.817841 | -0.006257 |
| 4             | 6             | 0           | 1.914543                | -0.466264 | 0.004725  |
| 5             | 6             | 0           | 2.784547                | -1.459152 | -0.431537 |
| 6             | 6             | 0           | 2.390705                | 0.785999  | 0.376529  |
| 7             | 6             | 0           | 4.148745                | -1.196964 | -0.493826 |
| 8             | 1             | 0           | 2.385636                | -2.424379 | -0.718825 |
| 9             | 6             | 0           | 3.760956                | 1.024922  | 0.306917  |
| 10            | 1             | 0           | 1.712870                | 1.557697  | 0.706090  |
| 11            | 6             | 0           | 4.663079                | 0.048404  | -0.122295 |
| 12            | 1             | 0           | 4.822074                | -1.975312 | -0.836533 |
| 13            | 1             | 0           | 4.131805                | 2.003302  | 0.593508  |
| 14            | 7             | 0           | -0.598445               | 1.340515  | -0.501710 |
| 15            | 6             | 0           | -1.652826               | 1.891789  | -0.565589 |
| 16            | 16            | 0           | -3.112654               | 2.559494  | -0.631564 |
| 17            | 6             | 0           | -2.692560               | -0.584111 | 1.232819  |
| 18            | 6             | 0           | -1.918372               | -1.378987 | -0.837567 |
| 19            | 6             | 0           | -3.960980               | -1.080622 | 0.981222  |
| 20            | 1             | 0           | -2.402182               | -0.041556 | 2.122316  |
| 21            | 6             | 0           | -3.165108               | -1.889085 | -1.137735 |
| 22            | 1             | 0           | -1.065875               | -1.429955 | -1.496713 |
| 23            | 6             | 0           | -4.201403               | -1.745138 | -0.214404 |
| 24            | 1             | 0           | -4.743080               | -0.928244 | 1.711916  |
| 25            | 1             | 0           | -3.319919               | -2.385481 | -2.085911 |
| 26            | 1             | 0           | -5.187589               | -2.133448 | -0.436417 |
| 27            | 7             | 0           | -1.709384               | -0.760123 | 0.339536  |
| 28            | 6             | 0           | 6.146030                | 0.321033  | -0.155105 |
| 29            | 1             | 0           | 6.352441                | 1.363763  | -0.407255 |
| 30            | 1             | 0           | 6.604226                | 0.122892  | 0.819871  |
| 31            | 1             | 0           | 6.650556                | -0.311026 | -0.889318 |

## tsfD33.

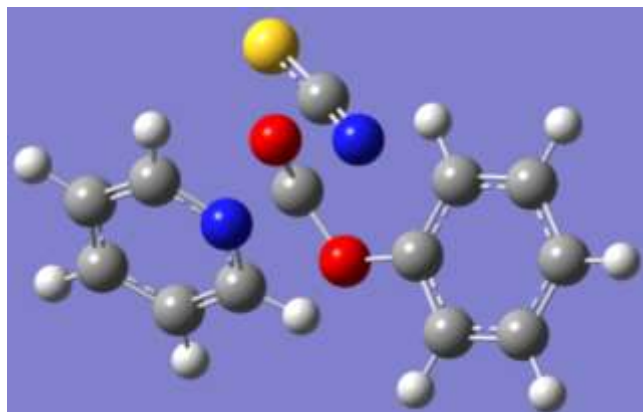

Input orientation:

| Center Number | Atomic Number | Atomic Type | Coordinates (Angstroms) |           |           |
|---------------|---------------|-------------|-------------------------|-----------|-----------|
|               |               |             | X                       | Y         | Z         |
| 1             | 6             | 0           | 0.031018                | -0.060207 | 0.653937  |
| 2             | 8             | 0           | 0.127229                | 0.393606  | 1.765884  |
| 3             | 8             | 0           | 0.975957                | -0.808610 | -0.000132 |
| 4             | 6             | 0           | 2.304837                | -0.399667 | -0.004515 |
| 5             | 6             | 0           | 3.212358                | -1.375221 | -0.407768 |
| 6             | 6             | 0           | 2.723644                | 0.884620  | 0.327872  |
| 7             | 6             | 0           | 4.565415                | -1.062066 | -0.480653 |
| 8             | 1             | 0           | 2.848427                | -2.364598 | -0.656193 |
| 9             | 6             | 0           | 4.083547                | 1.180072  | 0.250290  |
| 10            | 1             | 0           | 2.010919                | 1.633289  | 0.635741  |
| 11            | 6             | 0           | 5.007294                | 0.218280  | -0.150899 |
| 12            | 1             | 0           | 5.273014                | -1.821152 | -0.792868 |
| 13            | 1             | 0           | 4.417444                | 2.178529  | 0.507172  |
| 14            | 1             | 0           | 6.061216                | 0.462806  | -0.205171 |
| 15            | 7             | 0           | -0.274948               | 1.283679  | -0.587019 |
| 16            | 6             | 0           | -1.351167               | 1.788888  | -0.665562 |
| 17            | 16            | 0           | -2.838676               | 2.390965  | -0.746315 |
| 18            | 6             | 0           | -2.299322               | -0.658371 | 1.214185  |
| 19            | 6             | 0           | -1.479871               | -1.498120 | -0.821373 |
| 20            | 6             | 0           | -3.544957               | -1.214844 | 0.974610  |
| 21            | 1             | 0           | -2.037430               | -0.071913 | 2.084346  |
| 22            | 6             | 0           | -2.702996               | -2.068822 | -1.108337 |
| 23            | 1             | 0           | -0.622037               | -1.539023 | -1.474147 |
| 24            | 6             | 0           | -3.750404               | -1.932790 | -0.196268 |
| 25            | 1             | 0           | -4.337486               | -1.066483 | 1.694792  |
| 26            | 1             | 0           | -2.831449               | -2.605830 | -2.038126 |
| 27            | 1             | 0           | -4.718643               | -2.368694 | -0.408672 |
| 28            | 7             | 0           | -1.303282               | -0.828515 | 0.333526  |

tsfD34.

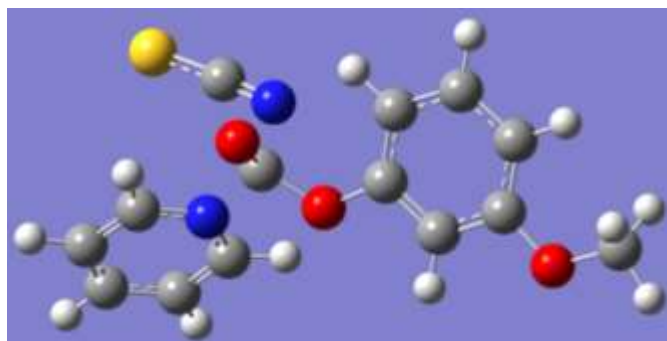

Input orientation:

| Center Number | Atomic Number | Atomic Type | Coordinates (Angstroms) |           |           |
|---------------|---------------|-------------|-------------------------|-----------|-----------|
|               |               |             | X                       | Y         | Z         |
| 1             | 6             | 0           | -0.675955               | 0.144325  | 0.727482  |
| 2             | 8             | 0           | -0.654994               | 0.612960  | 1.836852  |
| 3             | 8             | 0           | 0.366625                | -0.480323 | 0.091404  |
| 4             | 6             | 0           | 1.638221                | 0.080168  | 0.135022  |
| 5             | 6             | 0           | 2.664132                | -0.800763 | -0.169051 |
| 6             | 6             | 0           | 1.882080                | 1.422672  | 0.420020  |
| 7             | 6             | 0           | 3.981788                | -0.339767 | -0.191982 |
| 8             | 1             | 0           | 2.453467                | -1.840192 | -0.382497 |
| 9             | 6             | 0           | 3.200924                | 1.858372  | 0.392893  |
| 10            | 1             | 0           | 1.072946                | 2.096943  | 0.649406  |
| 11            | 6             | 0           | 4.258614                | 0.999499  | 0.091560  |
| 12            | 1             | 0           | 3.414064                | 2.898212  | 0.611057  |
| 13            | 1             | 0           | 5.270371                | 1.378524  | 0.081596  |
| 14            | 7             | 0           | -1.142513               | 1.426012  | -0.526710 |
| 15            | 6             | 0           | -2.271966               | 1.794111  | -0.618226 |
| 16            | 16            | 0           | -3.820494               | 2.211374  | -0.718035 |
| 17            | 6             | 0           | -2.914015               | -0.756077 | 1.264464  |
| 18            | 6             | 0           | -1.966297               | -1.486379 | -0.757599 |
| 19            | 6             | 0           | -4.072450               | -1.472571 | 1.012623  |
| 20            | 1             | 0           | -2.742078               | -0.137703 | 2.134981  |
| 21            | 6             | 0           | -3.099875               | -2.214490 | -1.056257 |
| 22            | 1             | 0           | -1.102250               | -1.416198 | -1.399783 |
| 23            | 6             | 0           | -4.167281               | -2.214519 | -0.157516 |
| 24            | 1             | 0           | -4.886062               | -1.428605 | 1.723173  |
| 25            | 1             | 0           | -3.144438               | -2.767485 | -1.984487 |
| 26            | 1             | 0           | -5.066897               | -2.775083 | -0.379061 |
| 27            | 7             | 0           | -1.894274               | -0.795260 | 0.395688  |
| 28            | 8             | 0           | 4.925349                | -1.277626 | -0.498112 |
| 29            | 6             | 0           | 6.287578                | -0.876359 | -0.512155 |
| 30            | 1             | 0           | 6.603430                | -0.506328 | 0.469070  |
| 31            | 1             | 0           | 6.858217                | -1.768657 | -0.763302 |
| 32            | 1             | 0           | 6.468601                | -0.104473 | -1.267799 |



tsfD35.

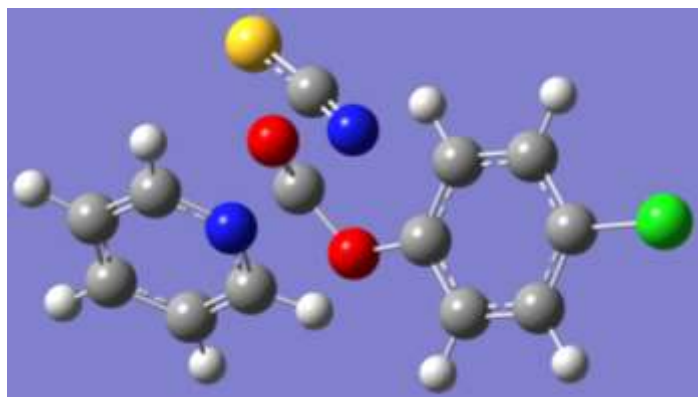

Input orientation:

| Center<br>Number | Atomic<br>Number | Atomic<br>Type | Coordinates (Angstroms) |           |           |
|------------------|------------------|----------------|-------------------------|-----------|-----------|
|                  |                  |                | X                       | Y         | Z         |
| 1                | 6                | 0              | -0.697916               | -0.105151 | 0.652549  |
| 2                | 8                | 0              | -0.579234               | 0.341647  | 1.764892  |
| 3                | 8                | 0              | 0.220942                | -0.886979 | -0.004878 |
| 4                | 6                | 0              | 1.561393                | -0.528968 | 0.007338  |
| 5                | 6                | 0              | 2.440990                | -1.539225 | -0.369740 |
| 6                | 6                | 0              | 2.025213                | 0.742450  | 0.330139  |
| 7                | 6                | 0              | 3.805969                | -1.283961 | -0.427647 |
| 8                | 1                | 0              | 2.050558                | -2.519423 | -0.612900 |
| 9                | 6                | 0              | 3.393594                | 0.994607  | 0.273332  |
| 10               | 1                | 0              | 1.339190                | 1.523730  | 0.616688  |
| 11               | 6                | 0              | 4.271526                | -0.014414 | -0.103061 |
| 12               | 1                | 0              | 4.499198                | -2.062154 | -0.717719 |
| 13               | 1                | 0              | 3.771686                | 1.977639  | 0.520806  |
| 14               | 7                | 0              | -0.937897               | 1.262284  | -0.590393 |
| 15               | 6                | 0              | -1.991823               | 1.814926  | -0.655395 |
| 16               | 16               | 0              | -3.452620               | 2.480255  | -0.714768 |
| 17               | 6                | 0              | -3.049894               | -0.593815 | 1.201892  |
| 18               | 6                | 0              | -2.259473               | -1.464925 | -0.833247 |
| 19               | 6                | 0              | -4.318327               | -1.091586 | 0.953854  |
| 20               | 1                | 0              | -2.766523               | -0.022944 | 2.075506  |
| 21               | 6                | 0              | -3.506078               | -1.977006 | -1.127741 |
| 22               | 1                | 0              | -1.401990               | -1.542578 | -1.482901 |
| 23               | 6                | 0              | -4.550781               | -1.795751 | -0.220170 |
| 24               | 1                | 0              | -5.106663               | -0.908855 | 1.670688  |
| 25               | 1                | 0              | -3.654521               | -2.504394 | -2.060032 |
| 26               | 1                | 0              | -5.536939               | -2.185974 | -0.438696 |
| 27               | 7                | 0              | -2.057507               | -0.807773 | 0.325542  |
| 28               | 17               | 0              | 5.997560                | 0.316034  | -0.168880 |

tsfD36.

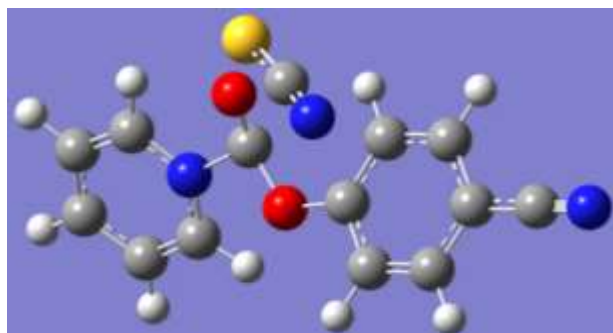

Input orientation:

| Center Number | Atomic Number | Atomic Type | Coordinates (Angstroms) |           |           |
|---------------|---------------|-------------|-------------------------|-----------|-----------|
|               |               |             | X                       | Y         | Z         |
| 1             | 6             | 0           | -0.569654               | -0.115673 | 0.689545  |
| 2             | 8             | 0           | -0.462448               | 0.361996  | 1.788725  |
| 3             | 8             | 0           | 0.363252                | -0.914748 | 0.065465  |
| 4             | 6             | 0           | 1.693118                | -0.544752 | 0.055738  |
| 5             | 6             | 0           | 2.571914                | -1.546633 | -0.354334 |
| 6             | 6             | 0           | 2.153369                | 0.726817  | 0.391817  |
| 7             | 6             | 0           | 3.929043                | -1.281505 | -0.432138 |
| 8             | 1             | 0           | 2.179000                | -2.523560 | -0.605367 |
| 9             | 6             | 0           | 3.514993                | 0.985995  | 0.311834  |
| 10            | 1             | 0           | 1.465942                | 1.496935  | 0.702576  |
| 11            | 6             | 0           | 4.412457                | -0.008523 | -0.097664 |
| 12            | 1             | 0           | 4.619012                | -2.053261 | -0.747862 |
| 13            | 1             | 0           | 3.888127                | 1.969489  | 0.566980  |
| 14            | 7             | 0           | -0.761005               | 1.239742  | -0.615831 |
| 15            | 6             | 0           | -1.804808               | 1.812320  | -0.670687 |
| 16            | 16            | 0           | -3.256856               | 2.498662  | -0.705901 |
| 17            | 6             | 0           | -2.937556               | -0.531202 | 1.182737  |
| 18            | 6             | 0           | -2.102936               | -1.486451 | -0.798635 |
| 19            | 6             | 0           | -4.207394               | -1.012133 | 0.910607  |
| 20            | 1             | 0           | -2.671583               | 0.061406  | 2.046877  |
| 21            | 6             | 0           | -3.350026               | -1.982283 | -1.114155 |
| 22            | 1             | 0           | -1.229342               | -1.602058 | -1.420046 |
| 23            | 6             | 0           | -4.418462               | -1.750368 | -0.245830 |
| 24            | 1             | 0           | -5.013165               | -0.788649 | 1.595714  |
| 25            | 1             | 0           | -3.480811               | -2.537187 | -2.032982 |
| 26            | 1             | 0           | -5.405263               | -2.128193 | -0.482219 |
| 27            | 7             | 0           | -1.921292               | -0.796092 | 0.346055  |
| 28            | 6             | 0           | 5.811105                | 0.269297  | -0.174556 |
| 29            | 7             | 0           | 6.943742                | 0.490462  | -0.237980 |

tsfD41.

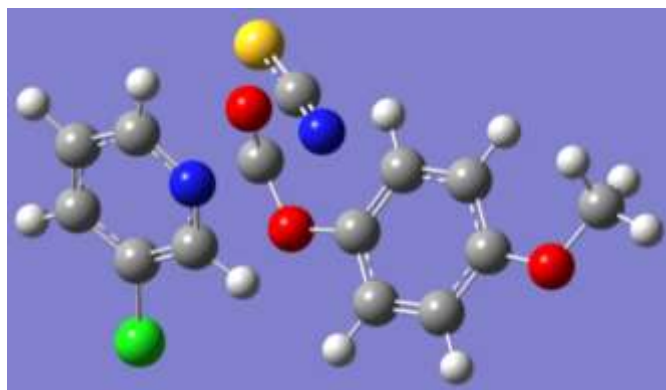

Input orientation:

| Center<br>Number | Atomic<br>Number | Atomic<br>Type | Coordinates (Angstroms) |           |           |
|------------------|------------------|----------------|-------------------------|-----------|-----------|
|                  |                  |                | X                       | Y         | Z         |
| 1                | 6                | 0              | -0.199051               | 0.439423  | 0.853625  |
| 2                | 8                | 0              | 0.063910                | 1.201504  | 1.748297  |
| 3                | 8                | 0              | 0.519626                | -0.655877 | 0.473641  |
| 4                | 6                | 0              | 1.897211                | -0.549533 | 0.279343  |
| 5                | 6                | 0              | 2.563502                | -1.764278 | 0.130643  |
| 6                | 6                | 0              | 2.585457                | 0.650706  | 0.201817  |
| 7                | 6                | 0              | 3.929320                | -1.778475 | -0.097869 |
| 8                | 1                | 0              | 2.003176                | -2.688747 | 0.196277  |
| 9                | 6                | 0              | 3.963253                | 0.633787  | -0.028443 |
| 10               | 1                | 0              | 2.069225                | 1.590976  | 0.315185  |
| 11               | 6                | 0              | 4.640348                | -0.576033 | -0.178898 |
| 12               | 1                | 0              | 4.465797                | -2.711460 | -0.215264 |
| 13               | 1                | 0              | 4.486728                | 1.577561  | -0.087072 |
| 14               | 7                | 0              | -0.354177               | 1.341611  | -0.758716 |
| 15               | 6                | 0              | -1.317123               | 2.007808  | -0.978115 |
| 16               | 16               | 0              | -2.665534               | 2.848504  | -1.217712 |
| 17               | 6                | 0              | -2.565668               | 0.579845  | 1.580840  |
| 18               | 6                | 0              | -2.072249               | -1.075167 | -0.014425 |
| 19               | 6                | 0              | -3.912740               | 0.255319  | 1.541017  |
| 20               | 1                | 0              | -2.131024               | 1.362047  | 2.187649  |
| 21               | 6                | 0              | -3.406736               | -1.426025 | -0.084248 |
| 22               | 1                | 0              | -1.295366               | -1.533784 | -0.605400 |
| 23               | 6                | 0              | -4.346859               | -0.762113 | 0.705031  |
| 24               | 1                | 0              | -4.610823               | 0.810642  | 2.151748  |
| 25               | 1                | 0              | -5.392685               | -1.032700 | 0.645047  |
| 26               | 7                | 0              | -1.691201               | -0.098501 | 0.827059  |
| 27               | 8                | 0              | 5.982451                | -0.691257 | -0.405072 |
| 28               | 6                | 0              | 6.747746                | 0.500324  | -0.504805 |
| 29               | 1                | 0              | 6.706227                | 1.079904  | 0.423907  |
| 30               | 1                | 0              | 7.772781                | 0.182428  | -0.686716 |
| 31               | 1                | 0              | 6.407126                | 1.124372  | -1.338213 |
| 32               | 17               | 0              | -3.895020               | -2.698050 | -1.163602 |

tsfD42.

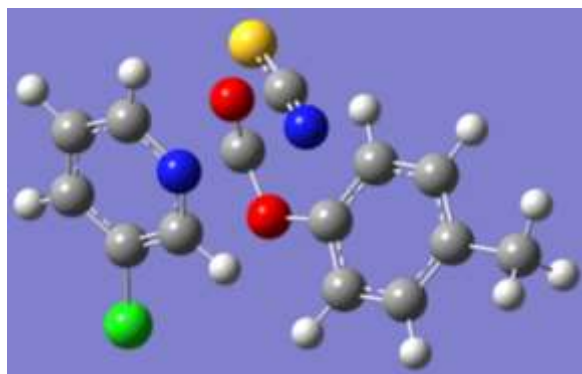

Input orientation:

| Center Number | Atomic Number | Atomic Type | Coordinates (Angstroms) |           |           |
|---------------|---------------|-------------|-------------------------|-----------|-----------|
|               |               |             | X                       | Y         | Z         |
| 1             | 6             | 0           | 0.100672                | 0.628866  | 0.652459  |
| 2             | 8             | 0           | 0.322322                | 1.623691  | 1.292713  |
| 3             | 8             | 0           | 0.883852                | -0.486500 | 0.574404  |
| 4             | 6             | 0           | 2.250626                | -0.363652 | 0.331217  |
| 5             | 6             | 0           | 2.983838                | -1.531015 | 0.514959  |
| 6             | 6             | 0           | 2.866813                | 0.808838  | -0.087315 |
| 7             | 6             | 0           | 4.352680                | -1.524158 | 0.274824  |
| 8             | 1             | 0           | 2.477611                | -2.428834 | 0.847953  |
| 9             | 6             | 0           | 4.240508                | 0.791097  | -0.321665 |
| 10            | 1             | 0           | 2.296244                | 1.713566  | -0.226468 |
| 11            | 6             | 0           | 5.006716                | -0.363346 | -0.150198 |
| 12            | 1             | 0           | 4.920392                | -2.436405 | 0.424033  |
| 13            | 1             | 0           | 4.722491                | 1.706862  | -0.646571 |
| 14            | 7             | 0           | -0.117096               | 1.035025  | -1.151419 |
| 15            | 6             | 0           | -1.119985               | 1.561925  | -1.519536 |
| 16            | 16            | 0           | -2.519892               | 2.229491  | -1.941340 |
| 17            | 6             | 0           | -2.266578               | 0.836062  | 1.353413  |
| 18            | 6             | 0           | -1.678740               | -1.170409 | 0.277503  |
| 19            | 6             | 0           | -3.591844               | 0.437338  | 1.431952  |
| 20            | 1             | 0           | -1.878636               | 1.780676  | 1.708399  |
| 21            | 6             | 0           | -2.989989               | -1.601427 | 0.334072  |
| 22            | 1             | 0           | -0.877374               | -1.731731 | -0.176001 |
| 23            | 6             | 0           | -3.966331               | -0.796933 | 0.923584  |
| 24            | 1             | 0           | -4.320307               | 1.101713  | 1.875350  |
| 25            | 1             | 0           | -4.994244               | -1.132309 | 0.961782  |
| 26            | 7             | 0           | -1.354480               | 0.023509  | 0.804295  |
| 27            | 6             | 0           | 6.486705                | -0.368503 | -0.439679 |
| 28            | 1             | 0           | 7.023494                | -1.031606 | 0.243024  |
| 29            | 1             | 0           | 6.686611                | -0.715884 | -1.459027 |
| 30            | 1             | 0           | 6.912887                | 0.632358  | -0.344400 |
| 31            | 17            | 0           | -3.404006               | -3.150802 | -0.336233 |

tsfD43.

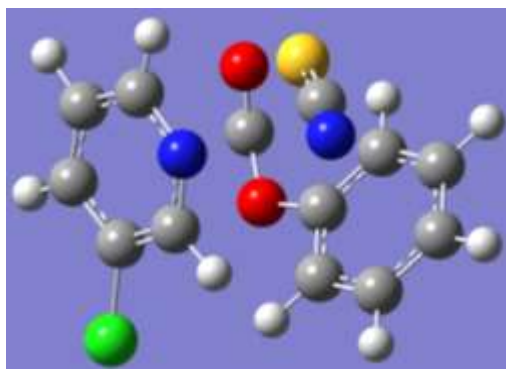

Input orientation:

| Center<br>Number | Atomic<br>Number | Atomic<br>Type | Coordinates (Angstroms) |           |           |
|------------------|------------------|----------------|-------------------------|-----------|-----------|
|                  |                  |                | X                       | Y         | Z         |
| 1                | 6                | 0              | 0.505088                | 0.463902  | 0.798782  |
| 2                | 8                | 0              | 0.795422                | 1.228236  | 1.681588  |
| 3                | 8                | 0              | 1.221992                | -0.625124 | 0.390547  |
| 4                | 6                | 0              | 2.589045                | -0.513409 | 0.151662  |
| 5                | 6                | 0              | 3.249141                | -1.727589 | -0.012501 |
| 6                | 6                | 0              | 3.263426                | 0.698402  | 0.049048  |
| 7                | 6                | 0              | 4.612958                | -1.731410 | -0.284477 |
| 8                | 1                | 0              | 2.689361                | -2.650520 | 0.075518  |
| 9                | 6                | 0              | 4.630264                | 0.674937  | -0.223782 |
| 10               | 1                | 0              | 2.739915                | 1.632871  | 0.175218  |
| 11               | 6                | 0              | 5.309956                | -0.528805 | -0.390785 |
| 12               | 1                | 0              | 5.129092                | -2.675674 | -0.411763 |
| 13               | 1                | 0              | 5.163204                | 1.614797  | -0.306770 |
| 14               | 1                | 0              | 6.372378                | -0.530780 | -0.602119 |
| 15               | 7                | 0              | 0.289615                | 1.368741  | -0.821110 |
| 16               | 6                | 0              | -0.679433               | 2.041173  | -0.987699 |
| 17               | 16               | 0              | -2.035865               | 2.888019  | -1.149046 |
| 18               | 6                | 0              | -1.836006               | 0.600459  | 1.589192  |
| 19               | 6                | 0              | -1.378030               | -1.062354 | -0.009942 |
| 20               | 6                | 0              | -3.181538               | 0.267234  | 1.589414  |
| 21               | 1                | 0              | -1.390114               | 1.388407  | 2.179905  |
| 22               | 6                | 0              | -2.711595               | -1.420947 | -0.039561 |
| 23               | 1                | 0              | -0.616080               | -1.520085 | -0.620474 |
| 24               | 6                | 0              | -3.633023               | -0.757918 | 0.772665  |
| 25               | 1                | 0              | -3.865136               | 0.822509  | 2.216301  |
| 26               | 1                | 0              | -4.678424               | -1.035172 | 0.744213  |
| 27               | 7                | 0              | -0.978441               | -0.078284 | 0.815446  |
| 28               | 17               | 0              | -3.222593               | -2.701586 | -1.097641 |

tsfD44.

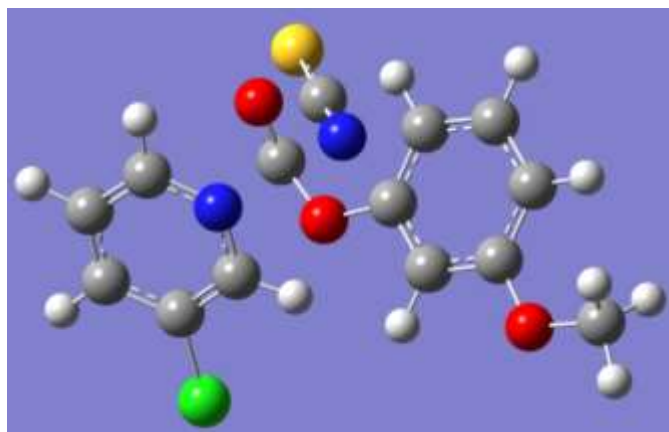

Input orientation:

| Center<br>Number | Atomic<br>Number | Atomic<br>Type | Coordinates (Angstroms) |           |           |
|------------------|------------------|----------------|-------------------------|-----------|-----------|
|                  |                  |                | X                       | Y         | Z         |
| 1                | 6                | 0              | 0.338054                | -0.883856 | 0.747606  |
| 2                | 8                | 0              | 0.279012                | -1.820605 | 1.514750  |
| 3                | 8                | 0              | -0.635761               | 0.074430  | 0.592163  |
| 4                | 6                | 0              | -1.951253               | -0.282719 | 0.335596  |
| 5                | 6                | 0              | -2.818431               | 0.796429  | 0.233028  |
| 6                | 6                | 0              | -2.396071               | -1.595472 | 0.173358  |
| 7                | 6                | 0              | -4.170572               | 0.572819  | -0.037327 |
| 8                | 1                | 0              | -2.449759               | 1.806188  | 0.358320  |
| 9                | 6                | 0              | -3.746414               | -1.793758 | -0.099755 |
| 10               | 1                | 0              | -1.718754               | -2.429386 | 0.259064  |
| 11               | 6                | 0              | -4.644318               | -0.732342 | -0.206847 |
| 12               | 1                | 0              | -4.111610               | -2.805537 | -0.230641 |
| 13               | 1                | 0              | -5.685384               | -0.929496 | -0.417116 |
| 14               | 7                | 0              | 0.541715                | -1.455182 | -0.960085 |
| 15               | 6                | 0              | 1.450933                | -2.095422 | -1.381799 |
| 16               | 16               | 0              | 2.679619                | -2.953860 | -1.969498 |
| 17               | 6                | 0              | 2.636654                | -0.488574 | 1.581357  |
| 18               | 6                | 0              | 1.784965                | 1.064565  | 0.028406  |
| 19               | 6                | 0              | 3.845974                | 0.182636  | 1.630217  |
| 20               | 1                | 0              | 2.408636                | -1.382686 | 2.142125  |
| 21               | 6                | 0              | 2.977993                | 1.760765  | 0.052083  |
| 22               | 1                | 0              | 0.939803                | 1.345481  | -0.579157 |
| 23               | 6                | 0              | 4.027681                | 1.323274  | 0.859349  |
| 24               | 1                | 0              | 4.635638                | -0.189544 | 2.266984  |
| 25               | 1                | 0              | 4.963801                | 1.864866  | 0.877310  |
| 26               | 7                | 0              | 1.649380                | -0.032578 | 0.795801  |
| 27               | 8                | 0              | -4.946391               | 1.689976  | -0.118180 |
| 28               | 6                | 0              | -6.339870               | 1.526300  | -0.390533 |
| 29               | 1                | 0              | -6.827415               | 0.940821  | 0.393805  |
| 30               | 1                | 0              | -6.757370               | 2.530510  | -0.408661 |
| 31               | 1                | 0              | -6.497310               | 1.046476  | -1.360365 |
| 32               | 17               | 0              | 3.148703                | 3.178180  | -0.937880 |

tsfD45.

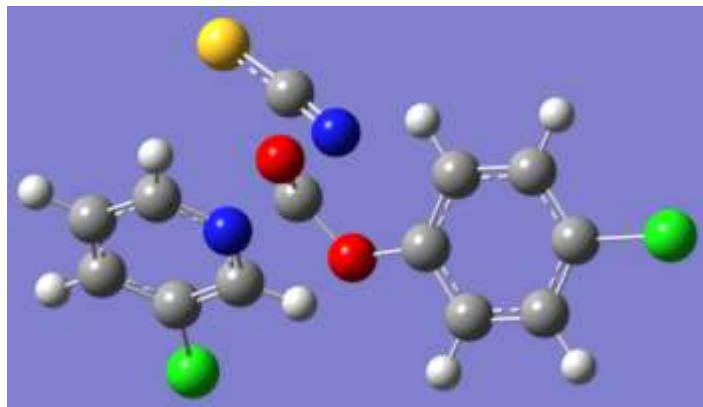

Input orientation:

| Center Number | Atomic Number | Atomic Type | Coordinates (Angstroms) |           |           |
|---------------|---------------|-------------|-------------------------|-----------|-----------|
|               |               |             | X                       | Y         | Z         |
| 1             | 6             | 0           | -0.224992               | 0.507134  | 0.823866  |
| 2             | 8             | 0           | 0.025541                | 1.287417  | 1.704717  |
| 3             | 8             | 0           | 0.541842                | -0.559863 | 0.438871  |
| 4             | 6             | 0           | 1.908981                | -0.395894 | 0.253532  |
| 5             | 6             | 0           | 2.633167                | -1.580678 | 0.167274  |
| 6             | 6             | 0           | 2.533977                | 0.840015  | 0.126045  |
| 7             | 6             | 0           | 4.005433                | -1.538332 | -0.049170 |
| 8             | 1             | 0           | 2.118351                | -2.527445 | 0.271567  |
| 9             | 6             | 0           | 3.909426                | 0.879026  | -0.088909 |
| 10            | 1             | 0           | 1.966811                | 1.755223  | 0.188270  |
| 11            | 6             | 0           | 4.633467                | -0.303783 | -0.174361 |
| 12            | 1             | 0           | 4.579785                | -2.452584 | -0.117154 |
| 13            | 1             | 0           | 4.412598                | 1.831356  | -0.191171 |
| 14            | 7             | 0           | -0.424886               | 1.394764  | -0.815614 |
| 15            | 6             | 0           | -1.416171               | 2.027284  | -1.008148 |
| 16            | 16            | 0           | -2.801792               | 2.817068  | -1.202023 |
| 17            | 6             | 0           | -2.579658               | 0.574330  | 1.561425  |
| 18            | 6             | 0           | -2.033460               | -1.075723 | -0.024541 |
| 19            | 6             | 0           | -3.913291               | 0.197902  | 1.532234  |
| 20            | 1             | 0           | -2.172946               | 1.377374  | 2.159831  |
| 21            | 6             | 0           | -3.353849               | -1.476213 | -0.083203 |
| 22            | 1             | 0           | -1.244687               | -1.509020 | -0.618365 |
| 23            | 6             | 0           | -4.313624               | -0.841990 | 0.707736  |
| 24            | 1             | 0           | -4.627878               | 0.732183  | 2.142562  |
| 25            | 1             | 0           | -5.348812               | -1.152311 | 0.656634  |
| 26            | 7             | 0           | -1.683320               | -0.078584 | 0.808655  |
| 27            | 17            | 0           | 6.369529                | -0.241206 | -0.444125 |
| 28            | 17            | 0           | -3.800368               | -2.772625 | -1.150249 |

tsfD46.

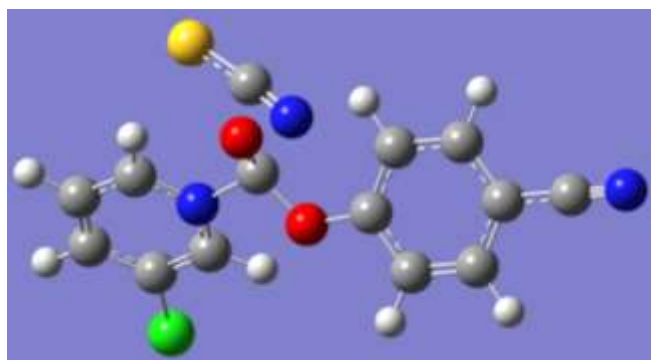

Input orientation:

| Center<br>Number | Atomic<br>Number | Atomic<br>Type | Coordinates (Angstroms) |           |           |
|------------------|------------------|----------------|-------------------------|-----------|-----------|
|                  |                  |                | X                       | Y         | Z         |
| 1                | 6                | 0              | -0.101061               | 0.504054  | 0.843218  |
| 2                | 8                | 0              | 0.149907                | 1.296729  | 1.711282  |
| 3                | 8                | 0              | 0.671337                | -0.571965 | 0.479138  |
| 4                | 6                | 0              | 2.030746                | -0.413430 | 0.284601  |
| 5                | 6                | 0              | 2.744705                | -1.605802 | 0.178141  |
| 6                | 6                | 0              | 2.663114                | 0.822299  | 0.170135  |
| 7                | 6                | 0              | 4.111384                | -1.569762 | -0.044508 |
| 8                | 1                | 0              | 2.219525                | -2.547530 | 0.273245  |
| 9                | 6                | 0              | 4.033380                | 0.851274  | -0.052654 |
| 10               | 1                | 0              | 2.100566                | 1.738740  | 0.247829  |
| 11               | 6                | 0              | 4.768017                | -0.336402 | -0.160691 |
| 12               | 1                | 0              | 4.675371                | -2.489724 | -0.127350 |
| 13               | 1                | 0              | 4.540169                | 1.803080  | -0.146183 |
| 14               | 7                | 0              | -0.258320               | 1.374275  | -0.838319 |
| 15               | 6                | 0              | -1.237199               | 2.026906  | -1.027563 |
| 16               | 16               | 0              | -2.609864               | 2.842233  | -1.207977 |
| 17               | 6                | 0              | -2.459915               | 0.619654  | 1.524899  |
| 18               | 6                | 0              | -1.898843               | -1.064817 | -0.022115 |
| 19               | 6                | 0              | -3.796529               | 0.256705  | 1.472649  |
| 20               | 1                | 0              | -2.058665               | 1.427656  | 2.119773  |
| 21               | 6                | 0              | -3.221828               | -1.450320 | -0.102806 |
| 22               | 1                | 0              | -1.103988               | -1.516908 | -0.592865 |
| 23               | 6                | 0              | -4.191028               | -0.792408 | 0.657750  |
| 24               | 1                | 0              | -4.517574               | 0.809927  | 2.057929  |
| 25               | 1                | 0              | -5.228341               | -1.092189 | 0.589831  |
| 26               | 7                | 0              | -1.553644               | -0.057941 | 0.803934  |
| 27               | 6                | 0              | 6.177396                | -0.294109 | -0.387736 |
| 28               | 7                | 0              | 7.318040                | -0.263507 | -0.571063 |
| 29               | 17               | 0              | -3.660567               | -2.757823 | -1.158296 |



tsfD51.

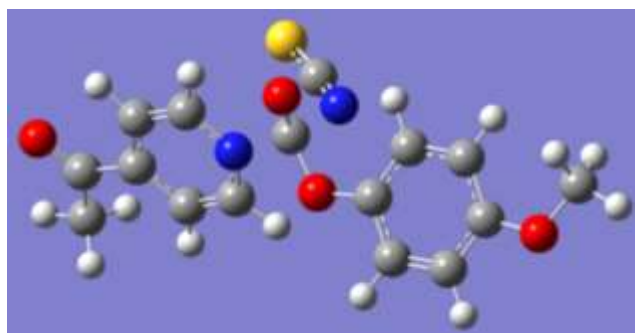

Input orientation:

| Center Number | Atomic Number | Atomic Type | Coordinates (Angstroms) |           |           |
|---------------|---------------|-------------|-------------------------|-----------|-----------|
|               |               |             | X                       | Y         | Z         |
| 1             | 6             | 0           | 0.198293                | 0.179415  | 0.812366  |
| 2             | 8             | 0           | 0.412600                | 0.673318  | 1.890787  |
| 3             | 8             | 0           | 0.924141                | -0.813166 | 0.211685  |
| 4             | 6             | 0           | 2.308703                | -0.694442 | 0.104567  |
| 5             | 6             | 0           | 2.953702                | -1.818479 | -0.409022 |
| 6             | 6             | 0           | 3.028893                | 0.440047  | 0.444719  |
| 7             | 6             | 0           | 4.327244                | -1.807632 | -0.584086 |
| 8             | 1             | 0           | 2.369811                | -2.693731 | -0.666077 |
| 9             | 6             | 0           | 4.414445                | 0.449159  | 0.265561  |
| 10            | 1             | 0           | 2.531451                | 1.309838  | 0.843828  |
| 11            | 6             | 0           | 5.069105                | -0.669824 | -0.247819 |
| 12            | 1             | 0           | 4.846210                | -2.671083 | -0.980625 |
| 13            | 1             | 0           | 4.961505                | 1.341685  | 0.534463  |
| 14            | 7             | 0           | 0.185339                | 1.453243  | -0.505839 |
| 15            | 6             | 0           | -0.783370               | 2.099508  | -0.756665 |
| 16            | 16            | 0           | -2.138659               | 2.901697  | -1.075519 |
| 17            | 6             | 0           | -2.204752               | 0.155613  | 1.436445  |
| 18            | 6             | 0           | -1.648940               | -0.953134 | -0.554933 |
| 19            | 6             | 0           | -3.549049               | -0.095266 | 1.234837  |
| 20            | 1             | 0           | -1.794390               | 0.706892  | 2.271857  |
| 21            | 6             | 0           | -2.979727               | -1.217815 | -0.809576 |
| 22            | 1             | 0           | -0.840008               | -1.234091 | -1.211315 |
| 23            | 6             | 0           | -3.954986               | -0.793398 | 0.098916  |
| 24            | 1             | 0           | -4.286581               | 0.257057  | 1.942392  |
| 25            | 1             | 0           | -3.238113               | -1.747371 | -1.715366 |
| 26            | 7             | 0           | -1.294134               | -0.290489 | 0.559051  |
| 27            | 8             | 0           | 6.416678                | -0.753830 | -0.455956 |
| 28            | 6             | 0           | 7.213360                | 0.376841  | -0.136337 |
| 29            | 1             | 0           | 7.146516                | 0.623316  | 0.928965  |
| 30            | 1             | 0           | 8.237374                | 0.098885  | -0.379271 |
| 31            | 1             | 0           | 6.922746                | 1.250188  | -0.730346 |
| 32            | 6             | 0           | -5.433244               | -1.035940 | -0.109245 |
| 33            | 8             | 0           | -6.210407               | -0.747823 | 0.774040  |
| 34            | 6             | 0           | -5.885511               | -1.623158 | -1.422941 |
| 35            | 1             | 0           | -5.556567               | -0.997491 | -2.257812 |
| 36            | 1             | 0           | -5.456970               | -2.619497 | -1.568163 |
| 37            | 1             | 0           | -6.971100               | -1.694776 | -1.424105 |

tsfD52.

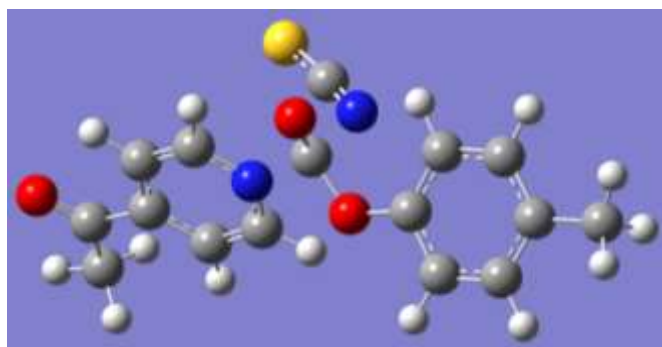

Input orientation:

| Center Number | Atomic Number | Atomic Type | Coordinates (Angstroms) |           |           |
|---------------|---------------|-------------|-------------------------|-----------|-----------|
|               |               |             | X                       | Y         | Z         |
| 1             | 6             | 0           | 0.532043                | 0.373557  | 0.672216  |
| 2             | 8             | 0           | 0.738423                | 1.053033  | 1.645190  |
| 3             | 8             | 0           | 1.279025                | -0.695245 | 0.251708  |
| 4             | 6             | 0           | 2.663242                | -0.581404 | 0.155049  |
| 5             | 6             | 0           | 3.334785                | -1.781297 | -0.057794 |
| 6             | 6             | 0           | 3.357290                | 0.619461  | 0.233835  |
| 7             | 6             | 0           | 4.717299                | -1.777738 | -0.195842 |
| 8             | 1             | 0           | 2.769057                | -2.703725 | -0.107088 |
| 9             | 6             | 0           | 4.743835                | 0.597916  | 0.092047  |
| 10            | 1             | 0           | 2.835922                | 1.548307  | 0.403588  |
| 11            | 6             | 0           | 5.448377                | -0.587189 | -0.126054 |
| 12            | 1             | 0           | 5.235047                | -2.717384 | -0.356926 |
| 13            | 1             | 0           | 5.285540                | 1.535461  | 0.155734  |
| 14            | 7             | 0           | 0.487750                | 1.396497  | -0.853549 |
| 15            | 6             | 0           | -0.490663               | 1.989778  | -1.185179 |
| 16            | 16            | 0           | -1.859058               | 2.723164  | -1.598463 |
| 17            | 6             | 0           | -1.868884               | 0.414039  | 1.296205  |
| 18            | 6             | 0           | -1.289205               | -1.017043 | -0.470685 |
| 19            | 6             | 0           | -3.207767               | 0.104698  | 1.145388  |
| 20            | 1             | 0           | -1.470808               | 1.111653  | 2.020793  |
| 21            | 6             | 0           | -2.614131               | -1.348071 | -0.671457 |
| 22            | 1             | 0           | -0.474240               | -1.393667 | -1.069100 |
| 23            | 6             | 0           | -3.598697               | -0.789920 | 0.150950  |
| 24            | 1             | 0           | -3.952656               | 0.561259  | 1.782093  |
| 25            | 1             | 0           | -2.861047               | -2.033971 | -1.469111 |
| 26            | 7             | 0           | -0.948693               | -0.161438 | 0.508506  |
| 27            | 6             | 0           | 6.945661                | -0.585745 | -0.305614 |
| 28            | 1             | 0           | 7.394847                | 0.313185  | 0.121328  |
| 29            | 1             | 0           | 7.405095                | -1.453903 | 0.173581  |
| 30            | 1             | 0           | 7.214885                | -0.617066 | -1.366815 |
| 31            | 6             | 0           | -5.071567               | -1.094784 | -0.007245 |
| 32            | 8             | 0           | -5.854988               | -0.672096 | 0.814178  |
| 33            | 6             | 0           | -5.511032               | -1.912116 | -1.196400 |
| 34            | 1             | 0           | -5.192872               | -1.437182 | -2.129064 |
| 35            | 1             | 0           | -5.063824               | -2.910364 | -1.164911 |
| 36            | 1             | 0           | -6.595086               | -2.003111 | -1.182731 |

tsfD53.

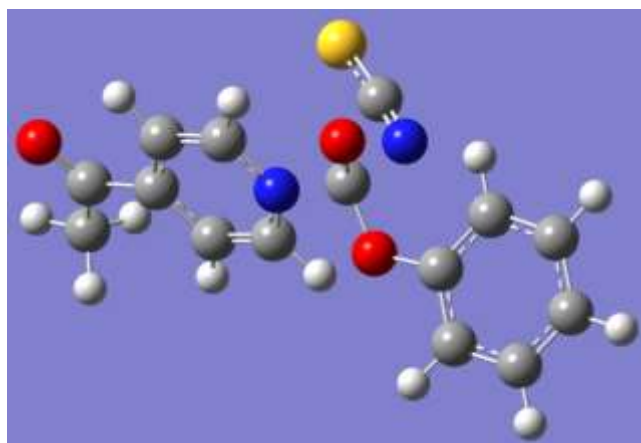

Input orientation:

| Center Number | Atomic Number | Atomic Type | Coordinates (Angstroms) |           |           |
|---------------|---------------|-------------|-------------------------|-----------|-----------|
|               |               |             | X                       | Y         | Z         |
| 1             | 6             | 0           | 0.919345                | 0.170071  | 0.754793  |
| 2             | 8             | 0           | 1.166831                | 0.638321  | 1.836106  |
| 3             | 8             | 0           | 1.635161                | -0.803841 | 0.106746  |
| 4             | 6             | 0           | 3.019946                | -0.705758 | 0.018129  |
| 5             | 6             | 0           | 3.659056                | -1.870040 | -0.398856 |
| 6             | 6             | 0           | 3.735600                | 0.456646  | 0.285590  |
| 7             | 6             | 0           | 5.041281                | -1.873365 | -0.552107 |
| 8             | 1             | 0           | 3.068104                | -2.756294 | -0.594655 |
| 9             | 6             | 0           | 5.120355                | 0.434361  | 0.127517  |
| 10            | 1             | 0           | 3.229329                | 1.353459  | 0.605981  |
| 11            | 6             | 0           | 5.778598                | -0.719957 | -0.288835 |
| 12            | 1             | 0           | 5.540331                | -2.779446 | -0.875053 |
| 13            | 1             | 0           | 5.684977                | 1.336086  | 0.333478  |
| 14            | 1             | 0           | 6.855488                | -0.722038 | -0.406037 |
| 15            | 7             | 0           | 0.859710                | 1.481996  | -0.539270 |
| 16            | 6             | 0           | -0.118495               | 2.136464  | -0.724147 |
| 17            | 16            | 0           | -1.487120               | 2.946442  | -0.952071 |
| 18            | 6             | 0           | -1.459575               | 0.115802  | 1.447098  |
| 19            | 6             | 0           | -0.956313               | -0.925128 | -0.595301 |
| 20            | 6             | 0           | -2.807702               | -0.137651 | 1.276567  |
| 21            | 1             | 0           | -1.028721               | 0.642893  | 2.287697  |
| 22            | 6             | 0           | -2.292336               | -1.189762 | -0.818990 |
| 23            | 1             | 0           | -0.165852               | -1.179815 | -1.284038 |
| 24            | 6             | 0           | -3.242941               | -0.801387 | 0.131102  |
| 25            | 1             | 0           | -3.525950               | 0.186854  | 2.016531  |
| 26            | 1             | 0           | -2.574513               | -1.691139 | -1.733678 |
| 27            | 7             | 0           | -0.572488               | -0.295952 | 0.529117  |
| 28            | 6             | 0           | -4.725332               | -1.047360 | -0.041475 |
| 29            | 6             | 0           | -5.211519               | -1.602060 | -1.357160 |
| 30            | 1             | 0           | -6.296052               | -1.683226 | -1.328604 |
| 31            | 1             | 0           | -4.912603               | -0.950543 | -2.183526 |
| 32            | 1             | 0           | -4.779224               | -2.590048 | -1.542571 |
| 33            | 8             | 0           | -5.478175               | -0.788081 | 0.871220  |

tsfD54.

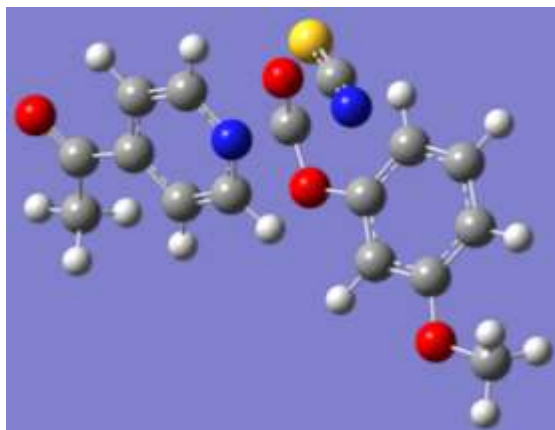

Input orientation:

| Center<br>Number | Atomic<br>Number | Atomic<br>Type | Coordinates (Angstroms) |           |           |
|------------------|------------------|----------------|-------------------------|-----------|-----------|
|                  |                  |                | X                       | Y         | Z         |
| 1                | 8                | 0              | -0.315004               | 1.371933  | -1.829067 |
| 2                | 8                | 0              | -1.101317               | -0.258131 | -0.407921 |
| 3                | 6                | 0              | -2.454889               | 0.041521  | -0.304065 |
| 4                | 6                | 0              | -3.254572               | -1.049423 | 0.000361  |
| 5                | 6                | 0              | -2.986007               | 1.320407  | -0.462541 |
| 6                | 6                | 0              | -4.630390               | -0.872194 | 0.154633  |
| 7                | 1                | 0              | -2.822609               | -2.034396 | 0.117169  |
| 8                | 6                | 0              | -4.358060               | 1.472499  | -0.303395 |
| 9                | 1                | 0              | -2.353517               | 2.160308  | -0.698695 |
| 10               | 6                | 0              | -5.192673               | 0.397500  | 0.002293  |
| 11               | 1                | 0              | -4.792195               | 2.458499  | -0.419817 |
| 12               | 1                | 0              | -6.254818               | 0.559542  | 0.116376  |
| 13               | 7                | 0              | -0.056123               | 1.737192  | 0.674379  |
| 14               | 6                | 0              | 0.989785                | 2.195843  | 1.012091  |
| 15               | 16               | 0              | 2.442903                | 2.739156  | 1.433014  |
| 16               | 6                | 0              | 2.181288                | 0.412669  | -1.416879 |
| 17               | 6                | 0              | 1.388030                | -0.906150 | 0.354771  |
| 18               | 6                | 0              | 3.464256                | -0.069675 | -1.238868 |
| 19               | 1                | 0              | 1.891719                | 1.147811  | -2.155488 |
| 20               | 6                | 0              | 2.653435                | -1.408568 | 0.581230  |
| 21               | 1                | 0              | 0.521099                | -1.162985 | 0.943263  |
| 22               | 6                | 0              | 3.716340                | -0.997774 | -0.230399 |
| 23               | 1                | 0              | 4.273607                | 0.277002  | -1.866114 |
| 24               | 1                | 0              | 2.793462                | -2.111100 | 1.390347  |
| 25               | 7                | 0              | 1.179166                | -0.027373 | -0.641161 |
| 26               | 8                | 0              | -5.336868               | -2.000969 | 0.453461  |
| 27               | 6                | 0              | -6.742755               | -1.886097 | 0.620823  |
| 28               | 1                | 0              | -7.225027               | -1.530124 | -0.295690 |
| 29               | 1                | 0              | -7.098002               | -2.889072 | 0.850273  |
| 30               | 1                | 0              | -6.991828               | -1.213696 | 1.448578  |
| 31               | 6                | 0              | 5.131950                | -1.497262 | -0.046827 |
| 32               | 6                | 0              | 5.436421                | -2.366784 | 1.147382  |
| 33               | 1                | 0              | 6.497640                | -2.606428 | 1.150036  |
| 34               | 1                | 0              | 5.172863                | -1.851927 | 2.075883  |
| 35               | 1                | 0              | 4.855975                | -3.293570 | 1.107514  |
| 36               | 8                | 0              | 5.979338                | -1.183864 | -0.853651 |
| 37               | 6                | 0              | -0.213039               | 0.690680  | -0.841771 |

-----  
**tsfD55.**

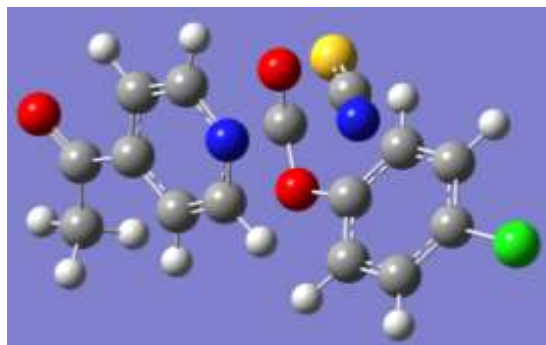

Input orientation:

| Center Number | Atomic Number | Atomic Type | Coordinates (Angstroms) |           |           |
|---------------|---------------|-------------|-------------------------|-----------|-----------|
|               |               |             | X                       | Y         | Z         |
| 1             | 6             | 0           | 0.190785                | 0.255692  | 0.779393  |
| 2             | 8             | 0           | 0.410145                | 0.768344  | 1.846515  |
| 3             | 8             | 0           | 0.957867                | -0.708229 | 0.171087  |
| 4             | 6             | 0           | 2.333558                | -0.543852 | 0.088921  |
| 5             | 6             | 0           | 3.036087                | -1.682356 | -0.294745 |
| 6             | 6             | 0           | 2.991838                | 0.657598  | 0.331242  |
| 7             | 6             | 0           | 4.416918                | -1.627626 | -0.442184 |
| 8             | 1             | 0           | 2.496930                | -2.604186 | -0.473344 |
| 9             | 6             | 0           | 4.375745                | 0.708837  | 0.183769  |
| 10            | 1             | 0           | 2.443629                | 1.538170  | 0.626254  |
| 11            | 6             | 0           | 5.076772                | -0.427492 | -0.200363 |
| 12            | 1             | 0           | 4.973557                | -2.506634 | -0.738714 |
| 13            | 1             | 0           | 4.903644                | 1.635204  | 0.367421  |
| 14            | 7             | 0           | 0.108705                | 1.527173  | -0.565068 |
| 15            | 6             | 0           | -0.884215               | 2.160644  | -0.746725 |
| 16            | 16            | 0           | -2.272310               | 2.938806  | -0.962951 |
| 17            | 6             | 0           | -2.192127               | 0.158389  | 1.427243  |
| 18            | 6             | 0           | -1.613534               | -0.953773 | -0.558177 |
| 19            | 6             | 0           | -3.527464               | -0.146343 | 1.241330  |
| 20            | 1             | 0           | -1.796617               | 0.734456  | 2.252712  |
| 21            | 6             | 0           | -2.935329               | -1.270096 | -0.795803 |
| 22            | 1             | 0           | -0.801923               | -1.211810 | -1.220277 |
| 23            | 6             | 0           | -3.917570               | -0.872864 | 0.118234  |
| 24            | 1             | 0           | -4.270751               | 0.186800  | 1.952138  |
| 25            | 1             | 0           | -3.182130               | -1.819794 | -1.692810 |
| 26            | 7             | 0           | -1.272478               | -0.265304 | 0.546256  |
| 27            | 17            | 0           | 6.823718                | -0.349731 | -0.382695 |
| 28            | 6             | 0           | -5.387997               | -1.174369 | -0.071022 |
| 29            | 6             | 0           | -5.831016               | -1.796448 | -1.371446 |
| 30            | 1             | 0           | -5.532915               | -1.172040 | -2.218757 |
| 31            | 1             | 0           | -5.368512               | -2.779032 | -1.506344 |
| 32            | 1             | 0           | -6.913264               | -1.907026 | -1.360860 |
| 33            | 8             | 0           | -6.165261               | -0.903608 | 0.817376  |

-----

tsfD56.

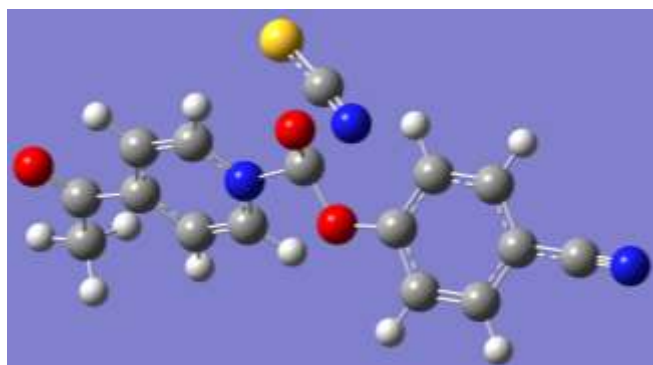

Input orientation:

| Center<br>Number | Atomic<br>Number | Atomic<br>Type | Coordinates (Angstroms) |           |           |
|------------------|------------------|----------------|-------------------------|-----------|-----------|
|                  |                  |                | X                       | Y         | Z         |
| 1                | 6                | 0              | 0.322447                | 0.246895  | 0.796146  |
| 2                | 8                | 0              | 0.544200                | 0.803114  | 1.839344  |
| 3                | 8                | 0              | 1.095775                | -0.743374 | 0.229726  |
| 4                | 6                | 0              | 2.463858                | -0.581295 | 0.134790  |
| 5                | 6                | 0              | 3.161462                | -1.732969 | -0.227344 |
| 6                | 6                | 0              | 3.124433                | 0.626988  | 0.346941  |
| 7                | 6                | 0              | 4.536872                | -1.683279 | -0.382398 |
| 8                | 1                | 0              | 2.615867                | -2.655198 | -0.380917 |
| 9                | 6                | 0              | 4.503338                | 0.669894  | 0.189931  |
| 10               | 1                | 0              | 2.576503                | 1.513266  | 0.623532  |
| 11               | 6                | 0              | 5.220429                | -0.476957 | -0.173951 |
| 12               | 1                | 0              | 5.087256                | -2.572223 | -0.662036 |
| 13               | 1                | 0              | 5.031026                | 1.601490  | 0.348782  |
| 14               | 7                | 0              | 0.275890                | 1.475742  | -0.623213 |
| 15               | 6                | 0              | -0.703961               | 2.133188  | -0.791070 |
| 16               | 16               | 0              | -2.079919               | 2.940192  | -0.976376 |
| 17               | 6                | 0              | -2.061627               | 0.229349  | 1.403107  |
| 18               | 6                | 0              | -1.466984               | -0.991769 | -0.514889 |
| 19               | 6                | 0              | -3.397886               | -0.064967 | 1.208475  |
| 20               | 1                | 0              | -1.672884               | 0.839796  | 2.206357  |
| 21               | 6                | 0              | -2.788890               | -1.299509 | -0.758296 |
| 22               | 1                | 0              | -0.649757               | -1.294336 | -1.150206 |
| 23               | 6                | 0              | -3.780320               | -0.842761 | 0.118119  |
| 24               | 1                | 0              | -4.147656               | 0.316119  | 1.887674  |
| 25               | 1                | 0              | -3.029547               | -1.890195 | -1.630603 |
| 26               | 7                | 0              | -1.132344               | -0.255089 | 0.562127  |
| 27               | 6                | 0              | 6.638682                | -0.420992 | -0.331635 |
| 28               | 7                | 0              | 7.786446                | -0.379297 | -0.460472 |
| 29               | 6                | 0              | -5.252317               | -1.133541 | -0.079400 |
| 30               | 6                | 0              | -5.682555               | -1.827150 | -1.347198 |
| 31               | 1                | 0              | -5.363641               | -1.257901 | -2.225276 |
| 32               | 1                | 0              | -5.230264               | -2.821305 | -1.415608 |
| 33               | 1                | 0              | -6.766120               | -1.924267 | -1.348014 |
| 34               | 8                | 0              | -6.039134               | -0.797652 | 0.777556  |

tsfD61.

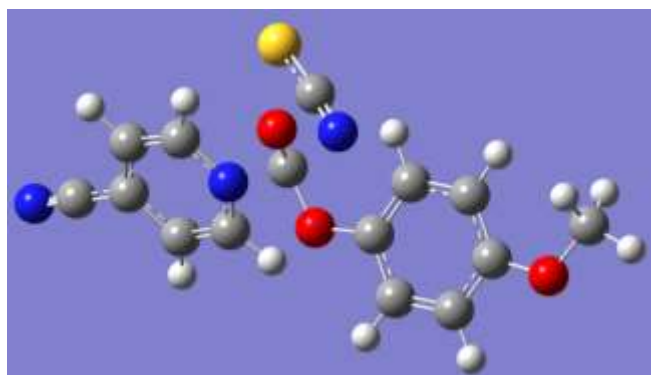

Input orientation:

| Center<br>Number | Atomic<br>Number | Atomic<br>Type | Coordinates (Angstroms) |           |           |
|------------------|------------------|----------------|-------------------------|-----------|-----------|
|                  |                  |                | X                       | Y         | Z         |
| 1                | 6                | 0              | -0.170436               | 0.107206  | 0.748875  |
| 2                | 8                | 0              | -0.011936               | 0.649938  | 1.813051  |
| 3                | 8                | 0              | 0.607014                | -0.873498 | 0.205486  |
| 4                | 6                | 0              | 1.987661                | -0.694348 | 0.107172  |
| 5                | 6                | 0              | 2.686601                | -1.797941 | -0.378465 |
| 6                | 6                | 0              | 2.651453                | 0.477590  | 0.433053  |
| 7                | 6                | 0              | 4.059960                | -1.728309 | -0.539958 |
| 8                | 1                | 0              | 2.145638                | -2.703316 | -0.624755 |
| 9                | 6                | 0              | 4.036876                | 0.546288  | 0.266580  |
| 10               | 1                | 0              | 2.111495                | 1.331002  | 0.812016  |
| 11               | 6                | 0              | 4.746353                | -0.551691 | -0.218946 |
| 12               | 1                | 0              | 4.621348                | -2.574567 | -0.915042 |
| 13               | 1                | 0              | 4.540645                | 1.467547  | 0.522821  |
| 14               | 7                | 0              | -0.223169               | 1.328954  | -0.617060 |
| 15               | 6                | 0              | -1.184109               | 2.017204  | -0.769132 |
| 16               | 16               | 0              | -2.537028               | 2.865771  | -0.932412 |
| 17               | 6                | 0              | -2.598086               | 0.073527  | 1.263872  |
| 18               | 6                | 0              | -1.934102               | -1.202815 | -0.591651 |
| 19               | 6                | 0              | -3.930084               | -0.226411 | 1.037192  |
| 20               | 1                | 0              | -2.237490               | 0.706805  | 2.063491  |
| 21               | 6                | 0              | -3.240937               | -1.535703 | -0.872614 |
| 22               | 1                | 0              | -1.091074               | -1.521063 | -1.185094 |
| 23               | 6                | 0              | -4.260875               | -1.049274 | -0.039919 |
| 24               | 1                | 0              | -4.692986               | 0.184856  | 1.682430  |
| 25               | 1                | 0              | -3.469094               | -2.160889 | -1.724163 |
| 26               | 7                | 0              | -1.642938               | -0.431042 | 0.472267  |
| 27               | 8                | 0              | 6.097463                | -0.578307 | -0.413163 |
| 28               | 6                | 0              | 6.838701                | 0.595445  | -0.114572 |
| 29               | 1                | 0              | 6.752529                | 0.862680  | 0.944249  |
| 30               | 1                | 0              | 7.876148                | 0.359736  | -0.344440 |
| 31               | 1                | 0              | 6.512057                | 1.440014  | -0.730870 |
| 32               | 6                | 0              | -5.624836               | -1.382414 | -0.303945 |
| 33               | 7                | 0              | -6.725274               | -1.658260 | -0.515569 |

tsfD62.

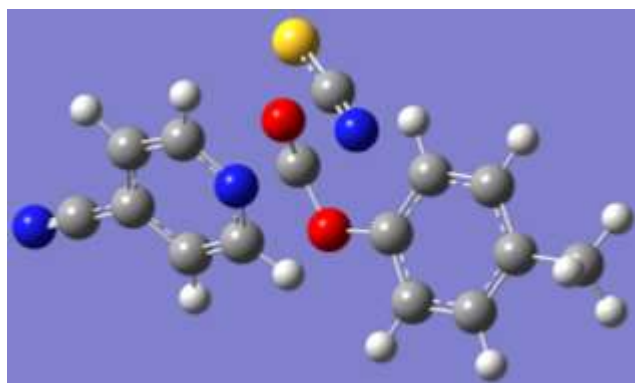

Input orientation:

| Center Number | Atomic Number | Atomic Type | Coordinates (Angstroms) |           |           |
|---------------|---------------|-------------|-------------------------|-----------|-----------|
|               |               |             | X                       | Y         | Z         |
| 1             | 6             | 0           | 0.161694                | 0.222828  | 0.693073  |
| 2             | 8             | 0           | 0.302409                | 0.866174  | 1.701339  |
| 3             | 8             | 0           | 0.976187                | -0.774113 | 0.236894  |
| 4             | 6             | 0           | 2.351652                | -0.565369 | 0.146201  |
| 5             | 6             | 0           | 3.093467                | -1.698172 | -0.171922 |
| 6             | 6             | 0           | 2.968600                | 0.666530  | 0.321700  |
| 7             | 6             | 0           | 4.471799                | -1.595647 | -0.313841 |
| 8             | 1             | 0           | 2.585349                | -2.645271 | -0.306504 |
| 9             | 6             | 0           | 4.352332                | 0.744664  | 0.172907  |
| 10            | 1             | 0           | 2.391217                | 1.544665  | 0.564669  |
| 11            | 6             | 0           | 5.127988                | -0.372254 | -0.142059 |
| 12            | 1             | 0           | 5.044867                | -2.482147 | -0.563706 |
| 13            | 1             | 0           | 4.833833                | 1.707432  | 0.305345  |
| 14            | 7             | 0           | 0.059634                | 1.312753  | -0.783574 |
| 15            | 6             | 0           | -0.925846               | 1.952175  | -0.984056 |
| 16            | 16            | 0           | -2.310115               | 2.735147  | -1.202699 |
| 17            | 6             | 0           | -2.261298               | 0.148967  | 1.216395  |
| 18            | 6             | 0           | -1.550341               | -1.267684 | -0.516310 |
| 19            | 6             | 0           | -3.581086               | -0.220598 | 1.023444  |
| 20            | 1             | 0           | -1.924902               | 0.865884  | 1.953435  |
| 21            | 6             | 0           | -2.843769               | -1.673064 | -0.760591 |
| 22            | 1             | 0           | -0.696312               | -1.607942 | -1.081078 |
| 23            | 6             | 0           | -3.881134               | -1.150913 | 0.028010  |
| 24            | 1             | 0           | -4.358504               | 0.219381  | 1.631321  |
| 25            | 1             | 0           | -3.048503               | -2.382112 | -1.550134 |
| 26            | 7             | 0           | -1.287882               | -0.390626 | 0.471157  |
| 27            | 6             | 0           | 6.627350                | -0.272849 | -0.267689 |
| 28            | 1             | 0           | 7.003031                | -0.917281 | -1.066200 |
| 29            | 1             | 0           | 6.939875                | 0.750808  | -0.483558 |
| 30            | 1             | 0           | 7.121235                | -0.579646 | 0.660476  |
| 31            | 6             | 0           | -5.231486               | -1.558535 | -0.198547 |
| 32            | 7             | 0           | -6.320619               | -1.894613 | -0.379364 |



tsfD63.

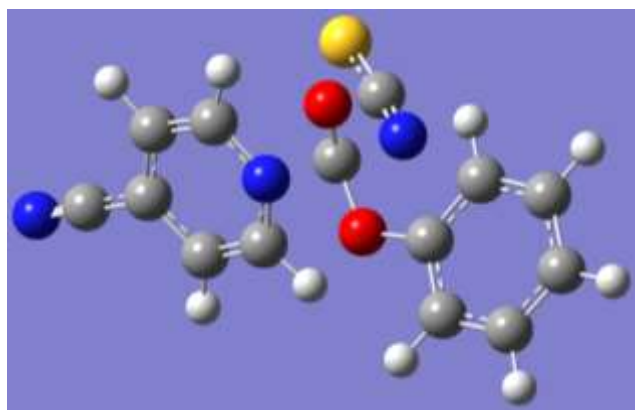

Input orientation:

| Center Number | Atomic Number | Atomic Type | Coordinates (Angstroms) |           |           |
|---------------|---------------|-------------|-------------------------|-----------|-----------|
|               |               |             | X                       | Y         | Z         |
| 1             | 6             | 0           | 0.556607                | 0.125302  | 0.713249  |
| 2             | 8             | 0           | 0.744961                | 0.635537  | 1.787317  |
| 3             | 8             | 0           | 1.347117                | -0.807055 | 0.100480  |
| 4             | 6             | 0           | 2.720550                | -0.599671 | -0.002359 |
| 5             | 6             | 0           | 3.441617                | -1.705719 | -0.442470 |
| 6             | 6             | 0           | 3.346729                | 0.610196  | 0.276527  |
| 7             | 6             | 0           | 4.818466                | -1.600843 | -0.607186 |
| 8             | 1             | 0           | 2.918557                | -2.631670 | -0.647329 |
| 9             | 6             | 0           | 4.727529                | 0.696621  | 0.105328  |
| 10            | 1             | 0           | 2.777402                | 1.460721  | 0.616762  |
| 11            | 6             | 0           | 5.467669                | -0.397927 | -0.333597 |
| 12            | 1             | 0           | 5.382145                | -2.461051 | -0.948446 |
| 13            | 1             | 0           | 5.223395                | 1.636007  | 0.319455  |
| 14            | 1             | 0           | 6.540227                | -0.315687 | -0.460719 |
| 15            | 7             | 0           | 0.403105                | 1.395990  | -0.611682 |
| 16            | 6             | 0           | -0.584493               | 2.059564  | -0.681158 |
| 17            | 16            | 0           | -1.970475               | 2.867713  | -0.729649 |
| 18            | 6             | 0           | -1.841309               | -0.007497 | 1.320395  |
| 19            | 6             | 0           | -1.209434               | -1.194773 | -0.605334 |
| 20            | 6             | 0           | -3.170038               | -0.348094 | 1.135806  |
| 21            | 1             | 0           | -1.471404               | 0.609524  | 2.128285  |
| 22            | 6             | 0           | -2.514079               | -1.564207 | -0.845879 |
| 23            | 1             | 0           | -0.381221               | -1.461824 | -1.243098 |
| 24            | 6             | 0           | -3.515692               | -1.144704 | 0.043944  |
| 25            | 1             | 0           | -3.919546               | 0.012405  | 1.825545  |
| 26            | 1             | 0           | -2.754882               | -2.167384 | -1.709724 |
| 27            | 7             | 0           | -0.901822               | -0.449996 | 0.473969  |
| 28            | 6             | 0           | -4.876565               | -1.518708 | -0.177295 |
| 29            | 7             | 0           | -5.974199               | -1.827779 | -0.354844 |

tsfD64.

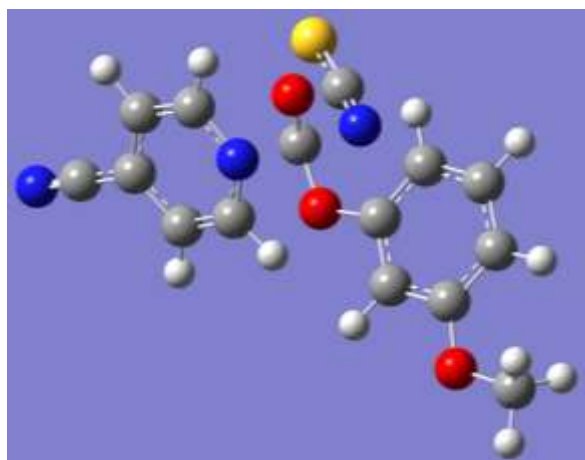

Input orientation:

| Center Number | Atomic Number | Atomic Type | Coordinates (Angstroms) |           |           |
|---------------|---------------|-------------|-------------------------|-----------|-----------|
|               |               |             | X                       | Y         | Z         |
| 1             | 6             | 0           | -0.179679               | 0.477768  | 0.784099  |
| 2             | 8             | 0           | -0.172501               | 1.142722  | 1.787489  |
| 3             | 8             | 0           | 0.790789                | -0.389136 | 0.366798  |
| 4             | 6             | 0           | 2.118975                | 0.021236  | 0.295684  |
| 5             | 6             | 0           | 3.007844                | -0.992789 | -0.024899 |
| 6             | 6             | 0           | 2.541384                | 1.333074  | 0.500879  |
| 7             | 6             | 0           | 4.367366                | -0.701209 | -0.148602 |
| 8             | 1             | 0           | 2.659130                | -2.005362 | -0.178145 |
| 9             | 6             | 0           | 3.899257                | 1.599614  | 0.370897  |
| 10            | 1             | 0           | 1.840421                | 2.112816  | 0.750262  |
| 11            | 6             | 0           | 4.822432                | 0.604740  | 0.049903  |
| 12            | 1             | 0           | 4.250408                | 2.613298  | 0.523347  |
| 13            | 1             | 0           | 5.869728                | 0.854287  | -0.040429 |
| 14            | 7             | 0           | -0.391244               | 1.531563  | -0.714473 |
| 15            | 6             | 0           | -1.450593               | 2.028109  | -0.940271 |
| 16            | 16            | 0           | -2.925731               | 2.610517  | -1.190967 |
| 17            | 6             | 0           | -2.584576               | 0.059637  | 1.209810  |
| 18            | 6             | 0           | -1.598279               | -1.270459 | -0.456281 |
| 19            | 6             | 0           | -3.825389               | -0.506830 | 0.975209  |
| 20            | 1             | 0           | -2.390248               | 0.832486  | 1.941202  |
| 21            | 6             | 0           | -2.805291               | -1.870619 | -0.738272 |
| 22            | 1             | 0           | -0.680243               | -1.490813 | -0.978260 |
| 23            | 6             | 0           | -3.941379               | -1.492767 | -0.004967 |
| 24            | 1             | 0           | -4.684691               | -0.174507 | 1.539673  |
| 25            | 1             | 0           | -2.868503               | -2.619113 | -1.515319 |
| 26            | 7             | 0           | -1.510703               | -0.344147 | 0.517713  |
| 27            | 8             | 0           | 5.166656                | -1.759683 | -0.466071 |
| 28            | 6             | 0           | 6.561095                | -1.527295 | -0.609803 |
| 29            | 1             | 0           | 7.002001                | -1.162133 | 0.323689  |
| 30            | 1             | 0           | 6.998326                | -2.491146 | -0.863653 |
| 31            | 1             | 0           | 6.764501                | -0.812148 | -1.413754 |
| 32            | 6             | 0           | -5.205310               | -2.102592 | -0.272242 |
| 33            | 7             | 0           | -6.223924               | -2.601164 | -0.486090 |

tsfD65.

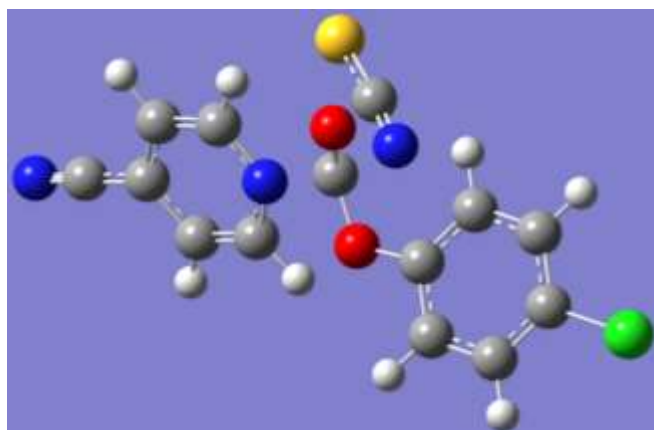

Input orientation:

| Center<br>Number | Atomic<br>Number | Atomic<br>Type | Coordinates (Angstroms) |           |           |
|------------------|------------------|----------------|-------------------------|-----------|-----------|
|                  |                  |                | X                       | Y         | Z         |
| 1                | 6                | 0              | -0.182822               | 0.167562  | 0.715349  |
| 2                | 8                | 0              | -0.021924               | 0.702958  | 1.781530  |
| 3                | 8                | 0              | 0.639354                | -0.765857 | 0.140960  |
| 4                | 6                | 0              | 2.009078                | -0.537742 | 0.082679  |
| 5                | 6                | 0              | 2.769555                | -1.643813 | -0.283546 |
| 6                | 6                | 0              | 2.605334                | 0.693343  | 0.333999  |
| 7                | 6                | 0              | 4.149023                | -1.525679 | -0.403461 |
| 8                | 1                | 0              | 2.277229                | -2.589924 | -0.470074 |
| 9                | 6                | 0              | 3.988076                | 0.808064  | 0.213525  |
| 10               | 1                | 0              | 2.011985                | 1.548453  | 0.616515  |
| 11               | 6                | 0              | 4.748188                | -0.295772 | -0.152550 |
| 12               | 1                | 0              | 4.751297                | -2.378701 | -0.686203 |
| 13               | 1                | 0              | 4.468938                | 1.758191  | 0.404491  |
| 14               | 7                | 0              | -0.308454               | 1.413555  | -0.645842 |
| 15               | 6                | 0              | -1.301640               | 2.065229  | -0.746357 |
| 16               | 16               | 0              | -2.695533               | 2.855379  | -0.833507 |
| 17               | 6                | 0              | -2.587466               | 0.025693  | 1.263261  |
| 18               | 6                | 0              | -1.893588               | -1.190268 | -0.624081 |
| 19               | 6                | 0              | -3.907179               | -0.332293 | 1.050130  |
| 20               | 1                | 0              | -2.245629               | 0.661102  | 2.069067  |
| 21               | 6                | 0              | -3.187630               | -1.576825 | -0.891252 |
| 22               | 1                | 0              | -1.047228               | -1.459915 | -1.236186 |
| 23               | 6                | 0              | -4.216461               | -1.152039 | -0.035346 |
| 24               | 1                | 0              | -4.677787               | 0.033240  | 1.713462  |
| 25               | 1                | 0              | -3.399709               | -2.197504 | -1.750206 |
| 26               | 7                | 0              | -1.621039               | -0.423193 | 0.449991  |
| 27               | 17               | 0              | 6.492187                | -0.138014 | -0.300011 |
| 28               | 6                | 0              | -5.567194               | -1.543963 | -0.284975 |
| 29               | 7                | 0              | -6.656674               | -1.867499 | -0.485382 |

tsfD66.

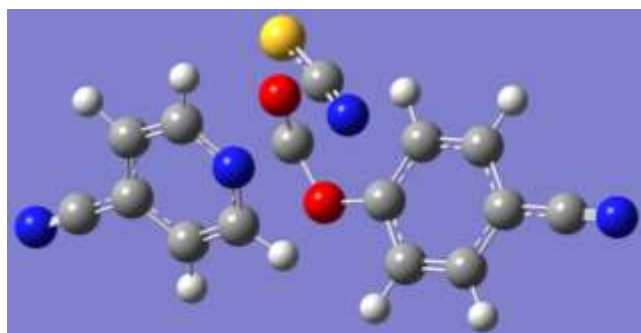

Input orientation:

| Center<br>Number | Atomic<br>Number | Atomic<br>Type | Coordinates (Angstroms) |           |           |
|------------------|------------------|----------------|-------------------------|-----------|-----------|
|                  |                  |                | X                       | Y         | Z         |
| 1                | 6                | 0              | -0.048603               | 0.145697  | 0.747945  |
| 2                | 8                | 0              | 0.119053                | 0.691449  | 1.806659  |
| 3                | 8                | 0              | 0.777162                | -0.796623 | 0.181984  |
| 4                | 6                | 0              | 2.139195                | -0.569105 | 0.109346  |
| 5                | 6                | 0              | 2.892106                | -1.676239 | -0.278319 |
| 6                | 6                | 0              | 2.740065                | 0.660367  | 0.368706  |
| 7                | 6                | 0              | 4.265851                | -1.559496 | -0.411129 |
| 8                | 1                | 0              | 2.391426                | -2.616848 | -0.468859 |
| 9                | 6                | 0              | 4.117666                | 0.770659  | 0.233096  |
| 10               | 1                | 0              | 2.149266                | 1.511616  | 0.666489  |
| 11               | 6                | 0              | 4.890678                | -0.330693 | -0.155255 |
| 12               | 1                | 0              | 4.859863                | -2.413231 | -0.710355 |
| 13               | 1                | 0              | 4.600155                | 1.719609  | 0.428489  |
| 14               | 7                | 0              | -0.142133               | 1.391933  | -0.645513 |
| 15               | 6                | 0              | -1.126038               | 2.059943  | -0.729390 |
| 16               | 16               | 0              | -2.511508               | 2.867550  | -0.785674 |
| 17               | 6                | 0              | -2.450732               | 0.055723  | 1.268830  |
| 18               | 6                | 0              | -1.752452               | -1.195508 | -0.596203 |
| 19               | 6                | 0              | -3.772413               | -0.287525 | 1.044530  |
| 20               | 1                | 0              | -2.110999               | 0.695724  | 2.071439  |
| 21               | 6                | 0              | -3.048220               | -1.566544 | -0.872371 |
| 22               | 1                | 0              | -0.904503               | -1.484631 | -1.196609 |
| 23               | 6                | 0              | -4.081064               | -1.117197 | -0.033114 |
| 24               | 1                | 0              | -4.544928               | 0.098144  | 1.694072  |
| 25               | 1                | 0              | -3.259216               | -2.194764 | -1.726078 |
| 26               | 7                | 0              | -1.479900               | -0.419327 | 0.473348  |
| 27               | 6                | 0              | 6.306960                | -0.205429 | -0.290341 |
| 28               | 7                | 0              | 7.453084                | -0.107151 | -0.400748 |
| 29               | 6                | 0              | -5.433845               | -1.494280 | -0.292770 |
| 30               | 7                | 0              | -6.525244               | -1.805928 | -0.501391 |

## Carbncss1.

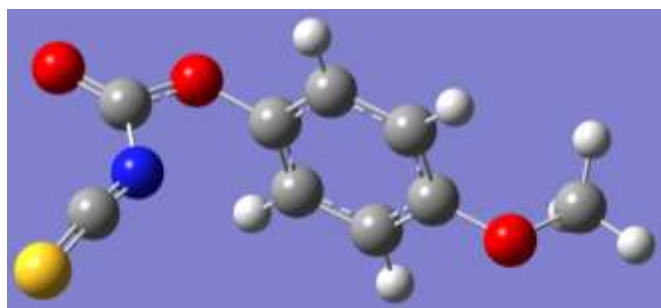

Input orientation:

| Center Number | Atomic Number | Atomic Type | Coordinates (Angstroms) |           |           |
|---------------|---------------|-------------|-------------------------|-----------|-----------|
|               |               |             | X                       | Y         | Z         |
| 1             | 6             | 0           | -2.036076               | 1.381087  | 0.000033  |
| 2             | 8             | 0           | -3.005418               | 2.092170  | 0.000065  |
| 3             | 8             | 0           | -0.794422               | 1.895031  | 0.000090  |
| 4             | 6             | 0           | 0.342073                | 1.060478  | 0.000061  |
| 5             | 6             | 0           | 0.911559                | 0.700375  | -1.214115 |
| 6             | 6             | 0           | 0.911479                | 0.700179  | 1.214217  |
| 7             | 6             | 0           | 2.078399                | -0.060381 | -1.211055 |
| 8             | 1             | 0           | 0.448643                | 1.006777  | -2.144091 |
| 9             | 6             | 0           | 2.078321                | -0.060575 | 1.211109  |
| 10            | 1             | 0           | 0.448505                | 1.006433  | 2.144212  |
| 11            | 6             | 0           | 2.658058                | -0.441802 | 0.000016  |
| 12            | 1             | 0           | 2.538566                | -0.364891 | -2.143371 |
| 13            | 1             | 0           | 2.538431                | -0.365235 | 2.143405  |
| 14            | 7             | 0           | -2.065832               | -0.014029 | -0.000064 |
| 15            | 6             | 0           | -2.923039               | -0.869375 | -0.000103 |
| 16            | 16            | 0           | -3.935719               | -2.057604 | -0.000161 |
| 17            | 8             | 0           | 3.780836                | -1.243047 | -0.000007 |
| 18            | 6             | 0           | 5.030418                | -0.532145 | -0.000016 |
| 19            | 1             | 0           | 5.121817                | 0.092104  | 0.894031  |
| 20            | 1             | 0           | 5.814386                | -1.287820 | -0.000034 |
| 21            | 1             | 0           | 5.121796                | 0.092123  | -0.894053 |

## Carbncss2.

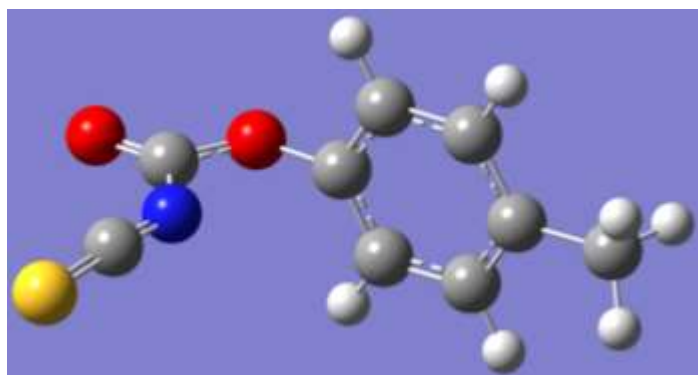

Input orientation:

| Center<br>Number | Atomic<br>Number | Atomic<br>Type | Coordinates (Angstroms) |           |           |
|------------------|------------------|----------------|-------------------------|-----------|-----------|
|                  |                  |                | X                       | Y         | Z         |
| 1                | 6                | 0              | 1.579346                | 1.419590  | -0.000783 |
| 2                | 8                | 0              | 2.521477                | 2.166944  | -0.001494 |
| 3                | 8                | 0              | 0.319872                | 1.883860  | -0.002692 |
| 4                | 6                | 0              | -0.784836               | 1.005009  | -0.001850 |
| 5                | 6                | 0              | -1.342758               | 0.624321  | 1.210193  |
| 6                | 6                | 0              | -1.340833               | 0.619576  | -1.213270 |
| 7                | 6                | 0              | -2.480096               | -0.180873 | 1.200866  |
| 8                | 1                | 0              | -0.894825               | 0.949385  | 2.141464  |
| 9                | 6                | 0              | -2.478193               | -0.185584 | -1.202593 |
| 10               | 1                | 0              | -0.891424               | 0.940989  | -2.145097 |
| 11               | 6                | 0              | -3.066797               | -0.597869 | -0.000520 |
| 12               | 1                | 0              | -2.916619               | -0.487115 | 2.145314  |
| 13               | 1                | 0              | -2.913216               | -0.495523 | -2.146526 |
| 14               | 7                | 0              | 1.664989                | 0.025931  | 0.002009  |
| 15               | 6                | 0              | 2.554754                | -0.794987 | 0.004315  |
| 16               | 16               | 0              | 3.613393                | -1.943122 | 0.007392  |
| 17               | 6                | 0              | -4.317641               | -1.442396 | 0.000167  |
| 18               | 1                | 0              | -4.367332               | -2.078007 | 0.886666  |
| 19               | 1                | 0              | -5.212357               | -0.810634 | -0.000938 |
| 20               | 1                | 0              | -4.366748               | -2.080322 | -0.884694 |

**Carbncss3.**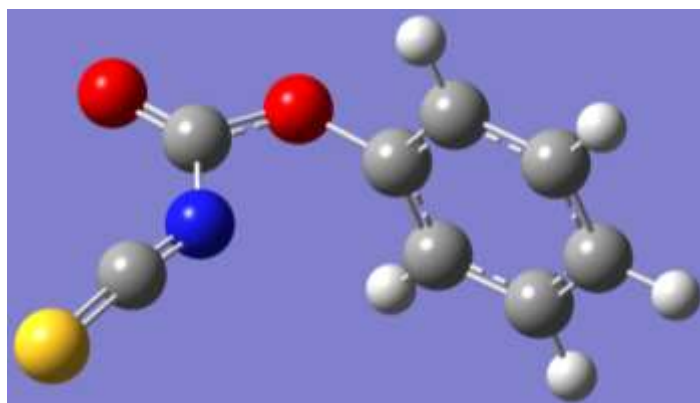

Input orientation:

| Center Number | Atomic Number | Atomic Type | Coordinates (Angstroms) |           |           |
|---------------|---------------|-------------|-------------------------|-----------|-----------|
|               |               |             | X                       | Y         | Z         |
| 1             | 6             | 0           | -0.955495               | 1.460184  | 0.000073  |
| 2             | 8             | 0           | -1.756826               | 2.356216  | 0.000127  |
| 3             | 8             | 0           | 0.365323                | 1.706363  | 0.000122  |
| 4             | 6             | 0           | 1.306945                | 0.656203  | 0.000064  |
| 5             | 6             | 0           | 1.789777                | 0.190544  | -1.215798 |
| 6             | 6             | 0           | 1.789700                | 0.190337  | 1.215878  |
| 7             | 6             | 0           | 2.779079                | -0.792306 | -1.208700 |
| 8             | 1             | 0           | 1.400119                | 0.590881  | -2.143740 |
| 9             | 6             | 0           | 2.779002                | -0.792511 | 1.208674  |
| 10            | 1             | 0           | 1.399985                | 0.590517  | 2.143863  |
| 11            | 6             | 0           | 3.272158                | -1.284930 | -0.000039 |
| 12            | 1             | 0           | 3.164821                | -1.168383 | -2.148848 |
| 13            | 1             | 0           | 3.164684                | -1.168749 | 2.148783  |
| 14            | 1             | 0           | 4.042419                | -2.047059 | -0.000080 |
| 15            | 7             | 0           | -1.272800               | 0.101669  | -0.000047 |
| 16            | 6             | 0           | -2.288270               | -0.558127 | -0.000114 |
| 17            | 16            | 0           | -3.523922               | -1.512115 | -0.000208 |

**Carbncss4.**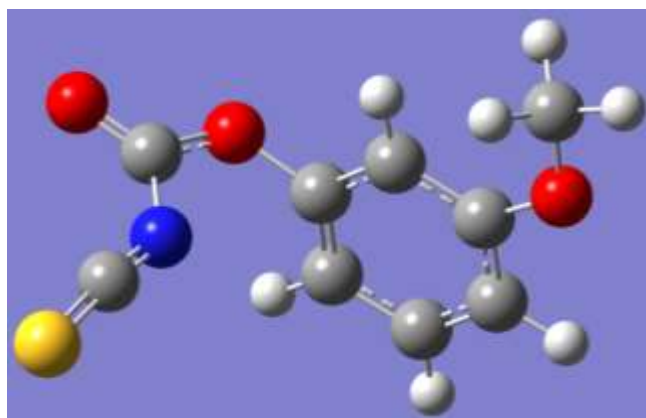

Input orientation:

| Center Number | Atomic Number | Atomic Type | Coordinates (Angstroms) |           |           |
|---------------|---------------|-------------|-------------------------|-----------|-----------|
|               |               |             | X                       | Y         | Z         |
| 1             | 6             | 0           | -1.625660               | -1.111571 | -0.937112 |
| 2             | 8             | 0           | -2.475540               | -1.576134 | -1.649527 |
| 3             | 8             | 0           | -0.387672               | -1.631824 | -0.899324 |
| 4             | 6             | 0           | 0.608077                | -1.094694 | -0.056550 |
| 5             | 6             | 0           | 0.741944                | -1.592836 | 1.227759  |
| 6             | 6             | 0           | 1.471117                | -0.148569 | -0.599899 |
| 7             | 6             | 0           | 1.789040                | -1.096868 | 2.010486  |
| 8             | 1             | 0           | 0.055741                | -2.341046 | 1.602626  |
| 9             | 6             | 0           | 2.512648                | 0.332846  | 0.199305  |
| 10            | 1             | 0           | 1.318247                | 0.186548  | -1.615822 |
| 11            | 6             | 0           | 2.666017                | -0.145260 | 1.509390  |
| 12            | 1             | 0           | 1.919594                | -1.463439 | 3.021680  |
| 13            | 1             | 0           | 3.479736                | 0.238020  | 2.112870  |
| 14            | 7             | 0           | -1.801152               | -0.016229 | -0.090728 |
| 15            | 6             | 0           | -2.708568               | 0.736444  | 0.185833  |
| 16            | 16            | 0           | -3.798727               | 1.765482  | 0.621776  |
| 17            | 8             | 0           | 3.420053                | 1.258388  | -0.210890 |
| 18            | 6             | 0           | 3.322402                | 1.775350  | -1.542018 |
| 19            | 1             | 0           | 4.139169                | 2.486738  | -1.642049 |
| 20            | 1             | 0           | 3.438647                | 0.978773  | -2.282140 |
| 21            | 1             | 0           | 2.369447                | 2.289228  | -1.695301 |



## Carbncss5.

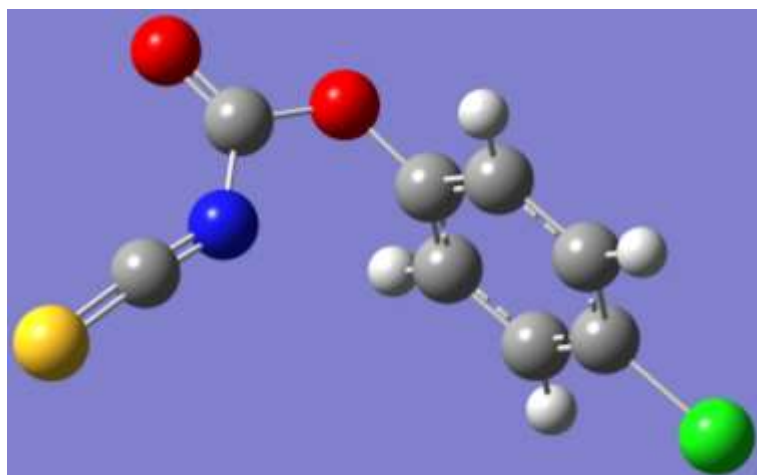

Input orientation:

| Center Number | Atomic Number | Atomic Type | Coordinates (Angstroms) |           |           |
|---------------|---------------|-------------|-------------------------|-----------|-----------|
|               |               |             | X                       | Y         | Z         |
| 1             | 6             | 0           | 2.036443                | -1.360644 | 0.000008  |
| 2             | 8             | 0           | 3.036550                | -2.026272 | 0.000013  |
| 3             | 8             | 0           | 0.819010                | -1.935761 | 0.000017  |
| 4             | 6             | 0           | -0.354152               | -1.160378 | 0.000011  |
| 5             | 6             | 0           | -0.942500               | -0.831240 | -1.213786 |
| 6             | 6             | 0           | -0.942492               | -0.831209 | 1.213803  |
| 7             | 6             | 0           | -2.148145               | -0.133524 | -1.215116 |
| 8             | 1             | 0           | -0.469057               | -1.116257 | -2.144917 |
| 9             | 6             | 0           | -2.148137               | -0.133493 | 1.215123  |
| 10            | 1             | 0           | -0.469043               | -1.116202 | 2.144938  |
| 11            | 6             | 0           | -2.734386               | 0.208853  | 0.000001  |
| 12            | 1             | 0           | -2.622677               | 0.135194  | -2.149630 |
| 13            | 1             | 0           | -2.622663               | 0.135249  | 2.149633  |
| 14            | 7             | 0           | 1.995784                | 0.032494  | -0.000008 |
| 15            | 6             | 0           | 2.815264                | 0.925418  | -0.000019 |
| 16            | 16            | 0           | 3.773592                | 2.156324  | -0.000035 |
| 17            | 17            | 0           | -4.258928               | 1.090801  | -0.000005 |

## Carbncss6.

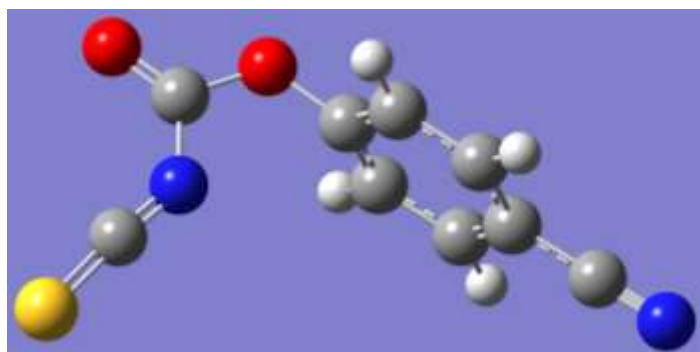

Input orientation:

| Center<br>Number | Atomic<br>Number | Atomic<br>Type | Coordinates (Angstroms) |           |           |
|------------------|------------------|----------------|-------------------------|-----------|-----------|
|                  |                  |                | X                       | Y         | Z         |
| 1                | 6                | 0              | -1.892842               | -1.347358 | 0.030640  |
| 2                | 8                | 0              | -2.882994               | -2.025894 | 0.052126  |
| 3                | 8                | 0              | -0.666077               | -1.909820 | 0.071290  |
| 4                | 6                | 0              | 0.496272                | -1.127685 | 0.046714  |
| 5                | 6                | 0              | 1.066295                | -0.737019 | 1.252701  |
| 6                | 6                | 0              | 1.093334                | -0.853570 | -1.178164 |
| 7                | 6                | 0              | 2.263383                | -0.032866 | 1.232936  |
| 8                | 1                | 0              | 0.581261                | -0.982834 | 2.188640  |
| 9                | 6                | 0              | 2.290441                | -0.149487 | -1.199284 |
| 10               | 1                | 0              | 0.628922                | -1.188298 | -2.096827 |
| 11               | 6                | 0              | 2.876705                | 0.264179  | 0.006460  |
| 12               | 1                | 0              | 2.722696                | 0.282958  | 2.160559  |
| 13               | 1                | 0              | 2.770563                | 0.076650  | -2.142440 |
| 14               | 7                | 0              | -1.862431               | 0.042903  | -0.035663 |
| 15               | 6                | 0              | -2.696083               | 0.922999  | -0.087175 |
| 16               | 16               | 0              | -3.671081               | 2.136733  | -0.156262 |
| 17               | 6                | 0              | 4.110319                | 0.987764  | -0.014512 |
| 18               | 7                | 0              | 5.107059                | 1.573124  | -0.031492 |

tssfD11.

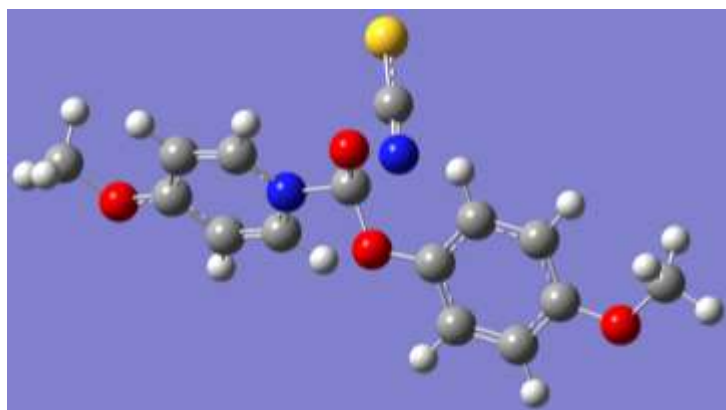

Input orientation:

| Center Number | Atomic Number | Atomic Type | Coordinates (Angstroms) |           |           |
|---------------|---------------|-------------|-------------------------|-----------|-----------|
|               |               |             | X                       | Y         | Z         |
| 1             | 6             | 0           | -0.254014               | 0.046365  | 0.776795  |
| 2             | 8             | 0           | -0.111294               | 0.499266  | 1.902531  |
| 3             | 8             | 0           | 0.492642                | -1.016063 | 0.277871  |
| 4             | 6             | 0           | 1.869767                | -0.905724 | 0.159072  |
| 5             | 6             | 0           | 2.469064                | -1.865516 | -0.659212 |
| 6             | 6             | 0           | 2.647451                | 0.055077  | 0.793418  |
| 7             | 6             | 0           | 3.842730                | -1.864015 | -0.840756 |
| 8             | 1             | 0           | 1.847959                | -2.605568 | -1.148618 |
| 9             | 6             | 0           | 4.032474                | 0.063283  | 0.600423  |
| 10            | 1             | 0           | 2.190356                | 0.792356  | 1.435249  |
| 11            | 6             | 0           | 4.636222                | -0.895422 | -0.213304 |
| 12            | 1             | 0           | 4.317008                | -2.604775 | -1.472752 |
| 13            | 1             | 0           | 4.619080                | 0.821979  | 1.098783  |
| 14            | 7             | 0           | 0.013303                | 1.266228  | -0.443406 |
| 15            | 6             | 0           | -0.562751               | 2.293243  | -0.608574 |
| 16            | 16            | 0           | -1.324752               | 3.686799  | -0.862003 |
| 17            | 6             | 0           | -2.675684               | -0.082040 | 1.266680  |
| 18            | 6             | 0           | -1.978708               | -0.896958 | -0.822690 |
| 19            | 6             | 0           | -3.993404               | -0.358701 | 0.980920  |
| 20            | 1             | 0           | -2.347703               | 0.360153  | 2.196174  |
| 21            | 6             | 0           | -3.266823               | -1.197319 | -1.170351 |
| 22            | 1             | 0           | -1.136167               | -1.070578 | -1.472969 |
| 23            | 6             | 0           | -4.310389               | -0.929019 | -0.262223 |
| 24            | 1             | 0           | -4.745393               | -0.128513 | 1.719227  |
| 25            | 1             | 0           | -3.486756               | -1.633514 | -2.134325 |
| 26            | 7             | 0           | -1.698284               | -0.351947 | 0.385805  |
| 27            | 8             | 0           | -5.537615               | -1.239178 | -0.662939 |
| 28            | 6             | 0           | -6.653770               | -0.980853 | 0.213816  |
| 29            | 1             | 0           | -6.723992               | 0.085383  | 0.433984  |
| 30            | 1             | 0           | -7.530863               | -1.306267 | -0.337553 |
| 31            | 1             | 0           | -6.554481               | -1.558504 | 1.134024  |
| 32            | 8             | 0           | 5.979155                | -0.971655 | -0.455496 |
| 33            | 6             | 0           | 6.828398                | -0.006518 | 0.164743  |
| 34            | 1             | 0           | 7.839477                | -0.251177 | -0.153646 |
| 35            | 1             | 0           | 6.577734                | 1.007282  | -0.161265 |
| 36            | 1             | 0           | 6.763640                | -0.067282 | 1.255070  |

## tssfD12.

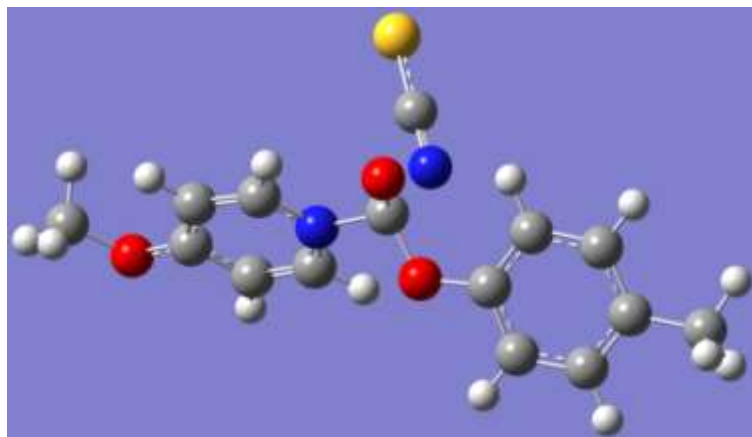

Input orientation:

| Center Number | Atomic Number | Atomic Type | Coordinates (Angstroms) |           |           |
|---------------|---------------|-------------|-------------------------|-----------|-----------|
|               |               |             | X                       | Y         | Z         |
| 1             | 6             | 0           | 0.077607                | 0.056831  | 0.731522  |
| 2             | 8             | 0           | 0.231642                | 0.452316  | 1.876759  |
| 3             | 8             | 0           | 0.836374                | -0.965542 | 0.168187  |
| 4             | 6             | 0           | 2.217030                | -0.874939 | 0.129756  |
| 5             | 6             | 0           | 2.854439                | -1.938329 | -0.509616 |
| 6             | 6             | 0           | 2.963075                | 0.175259  | 0.658186  |
| 7             | 6             | 0           | 4.239717                | -1.949884 | -0.617396 |
| 8             | 1             | 0           | 2.255429                | -2.741980 | -0.920503 |
| 9             | 6             | 0           | 4.353257                | 0.145769  | 0.532754  |
| 10            | 1             | 0           | 2.478493                | 0.999000  | 1.158348  |
| 11            | 6             | 0           | 5.017956                | -0.907743 | -0.097447 |
| 12            | 1             | 0           | 4.722974                | -2.781507 | -1.118981 |
| 13            | 1             | 0           | 4.928239                | 0.969809  | 0.941510  |
| 14            | 7             | 0           | 0.295599                | 1.340918  | -0.430085 |
| 15            | 6             | 0           | -0.283268               | 2.376899  | -0.508183 |
| 16            | 16            | 0           | -1.048925               | 3.784090  | -0.643354 |
| 17            | 6             | 0           | -2.331015               | -0.146852 | 1.248822  |
| 18            | 6             | 0           | -1.651763               | -0.834069 | -0.891903 |
| 19            | 6             | 0           | -3.647489               | -0.434177 | 0.968033  |
| 20            | 1             | 0           | -1.996892               | 0.251596  | 2.195715  |
| 21            | 6             | 0           | -2.939225               | -1.140904 | -1.236076 |
| 22            | 1             | 0           | -0.816597               | -0.954926 | -1.563349 |
| 23            | 6             | 0           | -3.973273               | -0.942667 | -0.299461 |
| 24            | 1             | 0           | -4.391833               | -0.259003 | 1.728809  |
| 25            | 1             | 0           | -3.166029               | -1.528484 | -2.219038 |
| 26            | 7             | 0           | -1.362897               | -0.349370 | 0.340109  |
| 27            | 8             | 0           | -5.200533               | -1.254876 | -0.698255 |
| 28            | 6             | 0           | -6.306640               | -1.068215 | 0.208888  |
| 29            | 1             | 0           | -6.394650               | -0.017128 | 0.487733  |
| 30            | 1             | 0           | -7.186222               | -1.381912 | -0.345288 |
| 31            | 1             | 0           | -6.179429               | -1.692651 | 1.094424  |
| 32            | 6             | 0           | 6.522634                | -0.939781 | -0.195325 |
| 33            | 1             | 0           | 6.949087                | 0.055488  | -0.056248 |
| 34            | 1             | 0           | 6.952494                | -1.593914 | 0.570581  |
| 35            | 1             | 0           | 6.849027                | -1.319623 | -1.166502 |

## tssfD13.

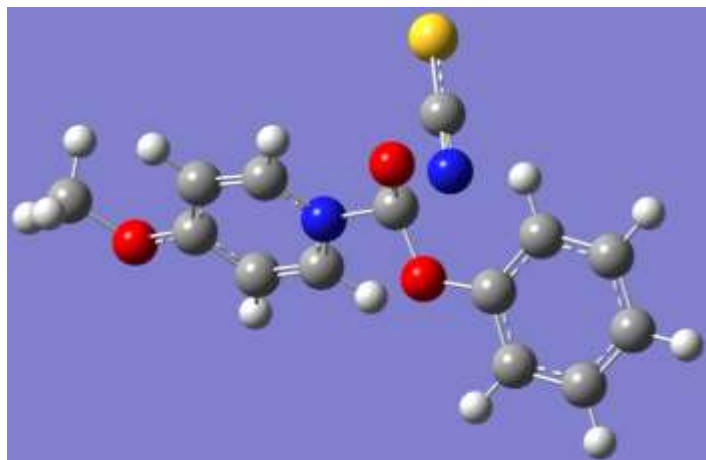

Input orientation:

| Center Number | Atomic Number | Atomic Type | Coordinates (Angstroms) |           |           |
|---------------|---------------|-------------|-------------------------|-----------|-----------|
|               |               |             | X                       | Y         | Z         |
| 1             | 6             | 0           | 0.447412                | -0.010897 | 0.702165  |
| 2             | 8             | 0           | 0.637373                | 0.370735  | 1.845555  |
| 3             | 8             | 0           | 1.154753                | -1.059591 | 0.118822  |
| 4             | 6             | 0           | 2.535928                | -1.038654 | 0.073796  |
| 5             | 6             | 0           | 3.111603                | -2.147402 | -0.548354 |
| 6             | 6             | 0           | 3.332108                | -0.013713 | 0.583572  |
| 7             | 6             | 0           | 4.494994                | -2.232506 | -0.662588 |
| 8             | 1             | 0           | 2.466811                | -2.926368 | -0.936336 |
| 9             | 6             | 0           | 4.718547                | -0.112778 | 0.455782  |
| 10            | 1             | 0           | 2.886600                | 0.838078  | 1.072472  |
| 11            | 6             | 0           | 5.307150                | -1.213765 | -0.161630 |
| 12            | 1             | 0           | 4.937197                | -3.095688 | -1.145969 |
| 13            | 1             | 0           | 5.338700                | 0.684094  | 0.849610  |
| 14            | 1             | 0           | 6.384649                | -1.279341 | -0.251144 |
| 15            | 7             | 0           | 0.707616                | 1.276599  | -0.462050 |
| 16            | 6             | 0           | 0.179123                | 2.340816  | -0.512355 |
| 17            | 16            | 0           | -0.520145               | 3.785618  | -0.608505 |
| 18            | 6             | 0           | -1.958709               | -0.103366 | 1.248151  |
| 19            | 6             | 0           | -1.337176               | -0.811985 | -0.903846 |
| 20            | 6             | 0           | -3.290082               | -0.328116 | 0.981895  |
| 21            | 1             | 0           | -1.595652               | 0.275028  | 2.192556  |
| 22            | 6             | 0           | -2.641291               | -1.057865 | -1.233125 |
| 23            | 1             | 0           | -0.516792               | -0.967810 | -1.586101 |
| 24            | 6             | 0           | -3.653937               | -0.816411 | -0.283282 |
| 25            | 1             | 0           | -4.016510               | -0.121649 | 1.752128  |
| 26            | 1             | 0           | -2.897370               | -1.430451 | -2.214688 |
| 27            | 7             | 0           | -1.011512               | -0.346734 | 0.326848  |
| 28            | 8             | 0           | -4.898503               | -1.070921 | -0.668062 |
| 29            | 6             | 0           | -5.984253               | -0.837677 | 0.252982  |
| 30            | 1             | 0           | -6.020016               | 0.214945  | 0.537308  |
| 31            | 1             | 0           | -6.883753               | -1.107613 | -0.292162 |
| 32            | 1             | 0           | -5.875686               | -1.471765 | 1.134134  |

tssfD14.

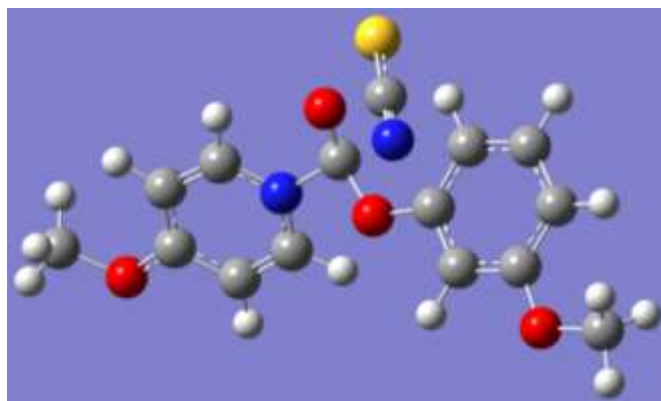

Input orientation:

| Center<br>Number | Atomic<br>Number | Atomic<br>Type | Coordinates (Angstroms) |           |           |
|------------------|------------------|----------------|-------------------------|-----------|-----------|
|                  |                  |                | X                       | Y         | Z         |
| 1                | 6                | 0              | -0.246217               | 0.389011  | 0.733380  |
| 2                | 8                | 0              | -0.192957               | 0.903333  | 1.837929  |
| 3                | 8                | 0              | 0.684936                | -0.541150 | 0.276839  |
| 4                | 6                | 0              | 2.037311                | -0.260011 | 0.312027  |
| 5                | 6                | 0              | 2.846641                | -1.310463 | -0.103718 |
| 6                | 6                | 0              | 2.585409                | 0.962894  | 0.707289  |
| 7                | 6                | 0              | 4.233858                | -1.151323 | -0.129478 |
| 8                | 1                | 0              | 2.403729                | -2.249910 | -0.408361 |
| 9                | 6                | 0              | 3.969783                | 1.100552  | 0.668825  |
| 10               | 1                | 0              | 1.958078                | 1.774328  | 1.037912  |
| 11               | 6                | 0              | 4.807498                | 0.063976  | 0.258132  |
| 12               | 1                | 0              | 4.411192                | 2.043153  | 0.970836  |
| 13               | 7                | 0              | -0.198164               | 1.592076  | -0.550281 |
| 14               | 6                | 0              | -0.843798               | 2.584039  | -0.662195 |
| 15               | 16               | 0              | -1.697970               | 3.935095  | -0.843391 |
| 16               | 6                | 0              | -2.597708               | -0.178432 | 1.225229  |
| 17               | 6                | 0              | -1.753459               | -0.876736 | -0.853492 |
| 18               | 6                | 0              | -3.837185               | -0.706859 | 0.945190  |
| 19               | 1                | 0              | -2.362535               | 0.332284  | 2.147594  |
| 20               | 6                | 0              | -2.959199               | -1.424048 | -1.194115 |
| 21               | 1                | 0              | -0.892497               | -0.894782 | -1.502528 |
| 22               | 6                | 0              | -4.036010               | -1.348243 | -0.288169 |
| 23               | 1                | 0              | -4.620782               | -0.613077 | 1.680764  |
| 24               | 1                | 0              | -3.090215               | -1.909084 | -2.150887 |
| 25               | 7                | 0              | -1.585273               | -0.269833 | 0.346713  |
| 26               | 8                | 0              | -5.178451               | -1.897878 | -0.681226 |
| 27               | 6                | 0              | -6.323040               | -1.852963 | 0.195816  |
| 28               | 1                | 0              | -6.608512               | -0.818613 | 0.393087  |
| 29               | 1                | 0              | -7.116014               | -2.362198 | -0.343657 |
| 30               | 1                | 0              | -6.107015               | -2.377748 | 1.127589  |
| 31               | 1                | 0              | 5.877664                | 0.210764  | 0.246255  |
| 32               | 8                | 0              | 4.942859                | -2.238349 | -0.547986 |
| 33               | 6                | 0              | 6.367738                | -2.140402 | -0.587576 |
| 34               | 1                | 0              | 6.776135                | -1.941976 | 0.407242  |
| 35               | 1                | 0              | 6.721052                | -3.106855 | -0.940262 |
| 36               | 1                | 0              | 6.689631                | -1.357896 | -1.280268 |

## tssfD15.

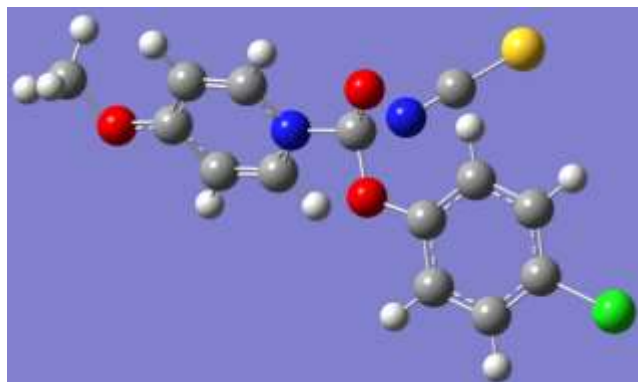

Input orientation:

| Center Number | Atomic Number | Atomic Type | Coordinates (Angstroms) |           |           |
|---------------|---------------|-------------|-------------------------|-----------|-----------|
|               |               |             | X                       | Y         | Z         |
| 1             | 6             | 0           | -0.404799               | 0.197213  | 0.670287  |
| 2             | 8             | 0           | -0.269635               | 0.706904  | 1.768160  |
| 3             | 8             | 0           | 0.418652                | -0.822829 | 0.186412  |
| 4             | 6             | 0           | 1.789070                | -0.664666 | 0.136324  |
| 5             | 6             | 0           | 2.461922                | -1.660142 | -0.572315 |
| 6             | 6             | 0           | 2.492832                | 0.383248  | 0.727446  |
| 7             | 6             | 0           | 3.844901                | -1.613800 | -0.697212 |
| 8             | 1             | 0           | 1.894467                | -2.462976 | -1.025563 |
| 9             | 6             | 0           | 3.879444                | 0.435030  | 0.592315  |
| 10            | 1             | 0           | 1.979774                | 1.147303  | 1.289354  |
| 11            | 6             | 0           | 4.541511                | -0.559891 | -0.114092 |
| 12            | 1             | 0           | 4.433072                | 1.248248  | 1.042694  |
| 13            | 7             | 0           | -0.253288               | 1.390917  | -0.647512 |
| 14            | 6             | 0           | 0.304029                | 2.439718  | -0.658820 |
| 15            | 16            | 0           | 1.044343                | 3.869197  | -0.704675 |
| 16            | 6             | 0           | -2.769208               | -0.179855 | 1.240284  |
| 17            | 6             | 0           | -2.072567               | -0.832296 | -0.907415 |
| 18            | 6             | 0           | -4.058001               | -0.591270 | 0.991567  |
| 19            | 1             | 0           | -2.455827               | 0.261721  | 2.174870  |
| 20            | 6             | 0           | -3.332391               | -1.262246 | -1.218954 |
| 21            | 1             | 0           | -1.244335               | -0.882996 | -1.595712 |
| 22            | 6             | 0           | -4.360632               | -1.148061 | -0.261965 |
| 23            | 1             | 0           | -4.799841               | -0.474618 | 1.765926  |
| 24            | 1             | 0           | -3.542686               | -1.682861 | -2.191911 |
| 25            | 7             | 0           | -1.805217               | -0.305025 | 0.312002  |
| 26            | 8             | 0           | -5.559867               | -1.581139 | -0.628502 |
| 27            | 6             | 0           | -6.660874               | -1.487989 | 0.299761  |
| 28            | 1             | 0           | -6.843230               | -0.446399 | 0.567843  |
| 29            | 1             | 0           | -7.517009               | -1.891623 | -0.232412 |
| 30            | 1             | 0           | -6.457150               | -2.085337 | 1.189588  |
| 31            | 1             | 0           | 4.369972                | -2.383946 | -1.246335 |
| 32            | 17            | 0           | 6.296665                | -0.488936 | -0.274916 |

## tssfD16.

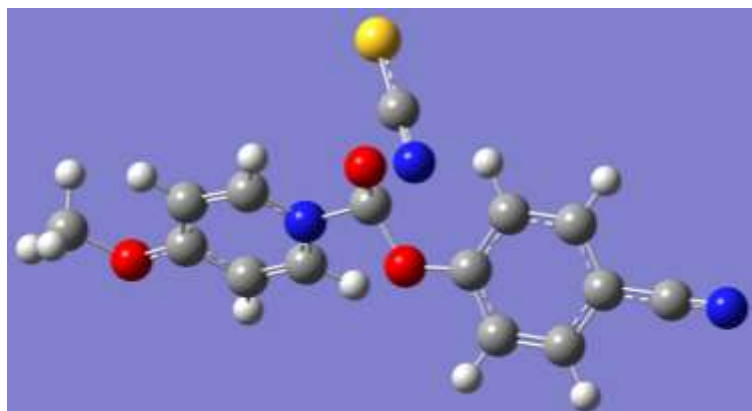

Input orientation:

| Center Number | Atomic Number | Atomic Type | Coordinates (Angstroms) |           |           |
|---------------|---------------|-------------|-------------------------|-----------|-----------|
|               |               |             | X                       | Y         | Z         |
| 1             | 6             | 0           | -0.117731               | 0.066089  | 0.714840  |
| 2             | 8             | 0           | 0.057418                | 0.467101  | 1.848878  |
| 3             | 8             | 0           | 0.678748                | -0.915505 | 0.117862  |
| 4             | 6             | 0           | 2.042987                | -0.794436 | 0.098906  |
| 5             | 6             | 0           | 2.712276                | -1.877938 | -0.477883 |
| 6             | 6             | 0           | 2.750534                | 0.306294  | 0.588013  |
| 7             | 6             | 0           | 4.092557                | -1.867587 | -0.570672 |
| 8             | 1             | 0           | 2.136196                | -2.715502 | -0.849093 |
| 9             | 6             | 0           | 4.135346                | 0.314847  | 0.489779  |
| 10            | 1             | 0           | 2.234374                | 1.137480  | 1.039924  |
| 11            | 6             | 0           | 4.816190                | -0.765986 | -0.086339 |
| 12            | 1             | 0           | 4.691978                | 1.164232  | 0.864107  |
| 13            | 7             | 0           | 0.062333                | 1.397613  | -0.484339 |
| 14            | 6             | 0           | -0.549871               | 2.416798  | -0.509303 |
| 15            | 16            | 0           | -1.367372               | 3.802084  | -0.566540 |
| 16            | 6             | 0           | -2.501000               | -0.182535 | 1.249563  |
| 17            | 6             | 0           | -1.819354               | -0.839070 | -0.904265 |
| 18            | 6             | 0           | -3.811656               | -0.492478 | 0.972305  |
| 19            | 1             | 0           | -2.171739               | 0.214246  | 2.198487  |
| 20            | 6             | 0           | -3.101967               | -1.167078 | -1.242411 |
| 21            | 1             | 0           | -0.987206               | -0.936034 | -1.582865 |
| 22            | 6             | 0           | -4.134877               | -0.996855 | -0.298224 |
| 23            | 1             | 0           | -4.554947               | -0.337745 | 1.738461  |
| 24            | 1             | 0           | -3.326894               | -1.549959 | -2.227565 |
| 25            | 7             | 0           | -1.532366               | -0.359902 | 0.332541  |
| 26            | 8             | 0           | -5.356312               | -1.329100 | -0.692450 |
| 27            | 6             | 0           | -6.462757               | -1.173086 | 0.221355  |
| 28            | 1             | 0           | -6.571296               | -0.126246 | 0.508316  |
| 29            | 1             | 0           | -7.337423               | -1.501158 | -0.332089 |
| 30            | 1             | 0           | -6.317776               | -1.801958 | 1.100826  |
| 31            | 1             | 0           | 4.612977                | -2.705017 | -1.016545 |
| 32            | 6             | 0           | 6.238792                | -0.748036 | -0.178989 |
| 33            | 7             | 0           | 7.393123                | -0.733641 | -0.254568 |



tssfD21.

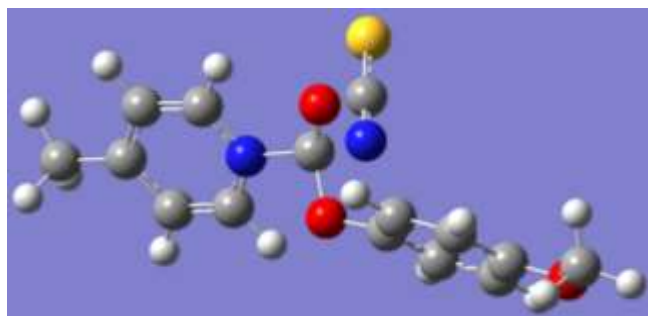

Input orientation:

| Center<br>Number | Atomic<br>Number | Atomic<br>Type | Coordinates (Angstroms) |           |           |
|------------------|------------------|----------------|-------------------------|-----------|-----------|
|                  |                  |                | X                       | Y         | Z         |
| 1                | 6                | 0              | -0.549794               | 0.223216  | 0.275660  |
| 2                | 8                | 0              | -0.318277               | 1.047057  | 1.143822  |
| 3                | 8                | 0              | 0.219289                | -0.925648 | 0.079583  |
| 4                | 6                | 0              | 1.596992                | -0.732483 | -0.015730 |
| 5                | 6                | 0              | 2.193773                | -0.790904 | -1.273038 |
| 6                | 6                | 0              | 2.365397                | -0.548129 | 1.123807  |
| 7                | 6                | 0              | 3.570609                | -0.660580 | -1.385965 |
| 8                | 1                | 0              | 1.575932                | -0.935809 | -2.149429 |
| 9                | 6                | 0              | 3.750778                | -0.413158 | 1.015882  |
| 10               | 1                | 0              | 1.887317                | -0.510522 | 2.093477  |
| 11               | 6                | 0              | 4.356474                | -0.467506 | -0.242687 |
| 12               | 1                | 0              | 4.054615                | -0.705819 | -2.353809 |
| 13               | 1                | 0              | 4.336446                | -0.271415 | 1.912973  |
| 14               | 7                | 0              | -0.515261               | 0.955083  | -1.309890 |
| 15               | 6                | 0              | -1.185168               | 1.833422  | -1.749498 |
| 16               | 16               | 0              | -2.077499               | 3.015864  | -2.377486 |
| 17               | 6                | 0              | -2.896303               | 0.208604  | 1.062126  |
| 18               | 6                | 0              | -2.351304               | -1.291847 | -0.658728 |
| 19               | 6                | 0              | -4.210752               | -0.212015 | 1.045979  |
| 20               | 1                | 0              | -2.509665               | 0.972530  | 1.720767  |
| 21               | 6                | 0              | -3.649792               | -1.743327 | -0.708404 |
| 22               | 1                | 0              | -1.566443               | -1.658719 | -1.300983 |
| 23               | 6                | 0              | -4.618937               | -1.208086 | 0.153859  |
| 24               | 1                | 0              | -4.913327               | 0.242627  | 1.731101  |
| 25               | 1                | 0              | -3.909345               | -2.511573 | -1.424480 |
| 26               | 7                | 0              | -1.998559               | -0.334015 | 0.224184  |
| 27               | 8                | 0              | 5.698925                | -0.348534 | -0.455251 |
| 28               | 6                | 0              | 6.546299                | -0.148620 | 0.676916  |
| 29               | 1                | 0              | 6.481064                | -0.991183 | 1.371250  |
| 30               | 1                | 0              | 7.557621                | -0.079729 | 0.282282  |
| 31               | 1                | 0              | 6.293329                | 0.778520  | 1.199152  |
| 32               | 6                | 0              | -6.031968               | -1.702247 | 0.123102  |
| 33               | 1                | 0              | -6.378676               | -1.824671 | -0.904743 |
| 34               | 1                | 0              | -6.087818               | -2.683939 | 0.604335  |
| 35               | 1                | 0              | -6.703738               | -1.025816 | 0.650598  |

tssfD22.

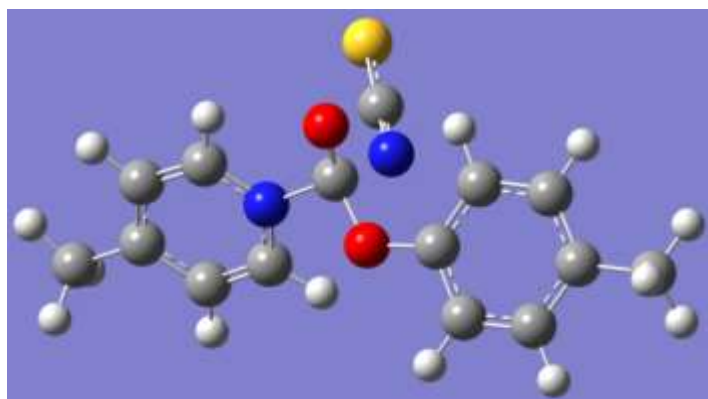

Input orientation:

| Center Number | Atomic Number | Atomic Type | Coordinates (Angstroms) |           |           |
|---------------|---------------|-------------|-------------------------|-----------|-----------|
|               |               |             | X                       | Y         | Z         |
| 1             | 6             | 0           | -0.231998               | -0.048357 | 0.801752  |
| 2             | 8             | 0           | -0.079477               | 0.321220  | 1.953208  |
| 3             | 8             | 0           | 0.561969                | -1.005036 | 0.187836  |
| 4             | 6             | 0           | 1.936647                | -0.844020 | 0.125306  |
| 5             | 6             | 0           | 2.610110                | -1.846978 | -0.571060 |
| 6             | 6             | 0           | 2.640254                | 0.220504  | 0.681881  |
| 7             | 6             | 0           | 3.991600                | -1.783773 | -0.707631 |
| 8             | 1             | 0           | 2.042441                | -2.662113 | -1.003144 |
| 9             | 6             | 0           | 4.026774                | 0.266773  | 0.526557  |
| 10            | 1             | 0           | 2.126229                | 0.997666  | 1.225385  |
| 11            | 6             | 0           | 4.728382                | -0.725690 | -0.160614 |
| 12            | 1             | 0           | 4.504234                | -2.568451 | -1.253594 |
| 13            | 1             | 0           | 4.569188                | 1.101789  | 0.956956  |
| 14            | 7             | 0           | -0.104882               | 1.297278  | -0.331050 |
| 15            | 6             | 0           | -0.752628               | 2.294138  | -0.360432 |
| 16            | 16            | 0           | -1.614747               | 3.650460  | -0.428030 |
| 17            | 6             | 0           | -2.627935               | -0.355778 | 1.336669  |
| 18            | 6             | 0           | -1.941625               | -0.978714 | -0.820260 |
| 19            | 6             | 0           | -3.933690               | -0.696401 | 1.045658  |
| 20            | 1             | 0           | -2.299428               | 0.039480  | 2.286755  |
| 21            | 6             | 0           | -3.228155               | -1.331505 | -1.153699 |
| 22            | 1             | 0           | -1.107514               | -1.052626 | -1.499861 |
| 23            | 6             | 0           | -4.264758               | -1.197116 | -0.216637 |
| 24            | 1             | 0           | -4.689881               | -0.567368 | 1.807924  |
| 25            | 1             | 0           | -3.425481               | -1.709338 | -2.148003 |
| 26            | 7             | 0           | -1.664984               | -0.505325 | 0.413450  |
| 27            | 6             | 0           | 6.230270                | -0.678291 | -0.288937 |
| 28            | 1             | 0           | 6.607310                | 0.337141  | -0.152632 |
| 29            | 1             | 0           | 6.708617                | -1.312313 | 0.465091  |
| 30            | 1             | 0           | 6.556057                | -1.036537 | -1.268331 |
| 31            | 6             | 0           | -5.668465               | -1.582690 | -0.566817 |
| 32            | 1             | 0           | -5.982467               | -1.085169 | -1.487652 |
| 33            | 1             | 0           | -5.725120               | -2.660207 | -0.746819 |
| 34            | 1             | 0           | -6.365198               | -1.326405 | 0.230201  |

tssfD23.

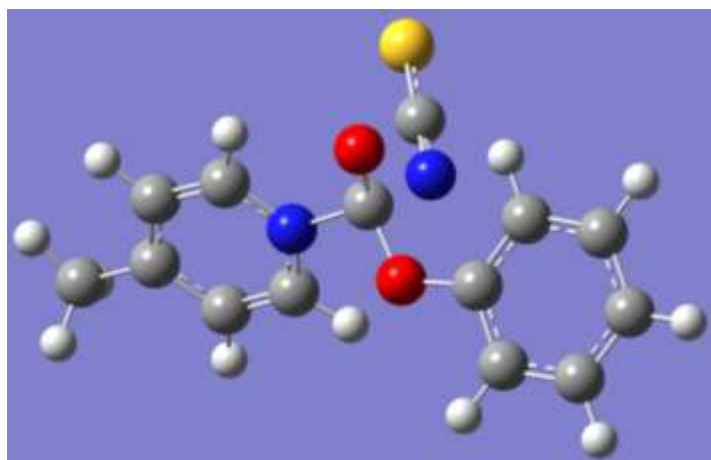

Input orientation:

| Center Number | Atomic Number | Atomic Type | Coordinates (Angstroms) |           |           |
|---------------|---------------|-------------|-------------------------|-----------|-----------|
|               |               |             | X                       | Y         | Z         |
| 1             | 6             | 0           | 0.143761                | -0.038845 | 0.732166  |
| 2             | 8             | 0           | 0.337353                | 0.384714  | 1.857554  |
| 3             | 8             | 0           | 0.887322                | -1.056755 | 0.152527  |
| 4             | 6             | 0           | 2.265429                | -0.966239 | 0.071104  |
| 5             | 6             | 0           | 2.880771                | -2.055862 | -0.545932 |
| 6             | 6             | 0           | 3.018689                | 0.108463  | 0.541007  |
| 7             | 6             | 0           | 4.263390                | -2.071163 | -0.695604 |
| 8             | 1             | 0           | 2.267639                | -2.874399 | -0.902366 |
| 9             | 6             | 0           | 4.404605                | 0.079066  | 0.377713  |
| 10            | 1             | 0           | 2.541424                | 0.945240  | 1.025864  |
| 11            | 6             | 0           | 5.033525                | -1.001882 | -0.235342 |
| 12            | 1             | 0           | 4.737631                | -2.919408 | -1.174952 |
| 13            | 1             | 0           | 4.992224                | 0.914556  | 0.739988  |
| 14            | 1             | 0           | 6.110250                | -1.013131 | -0.352911 |
| 15            | 7             | 0           | 0.303650                | 1.244521  | -0.479249 |
| 16            | 6             | 0           | -0.308360               | 2.261906  | -0.546819 |
| 17            | 16            | 0           | -1.123764               | 3.643567  | -0.665956 |
| 18            | 6             | 0           | -2.249266               | -0.209864 | 1.323884  |
| 19            | 6             | 0           | -1.632361               | -0.978421 | -0.807474 |
| 20            | 6             | 0           | -3.573724               | -0.507867 | 1.074139  |
| 21            | 1             | 0           | -1.885958               | 0.221551  | 2.245067  |
| 22            | 6             | 0           | -2.939064               | -1.291505 | -1.098749 |
| 23            | 1             | 0           | -0.815741               | -1.125681 | -1.496233 |
| 24            | 6             | 0           | -3.950598               | -1.060885 | -0.152952 |
| 25            | 1             | 0           | -4.308596               | -0.304897 | 1.841132  |
| 26            | 1             | 0           | -3.171642               | -1.713635 | -2.067296 |
| 27            | 7             | 0           | -1.311544               | -0.451696 | 0.393841  |
| 28            | 6             | 0           | -5.376414               | -1.399597 | -0.458845 |
| 29            | 1             | 0           | -5.696272               | -0.902043 | -1.377925 |
| 30            | 1             | 0           | -5.478421               | -2.476098 | -0.622755 |
| 31            | 1             | 0           | -6.041245               | -1.105294 | 0.352113  |

tssfD24.

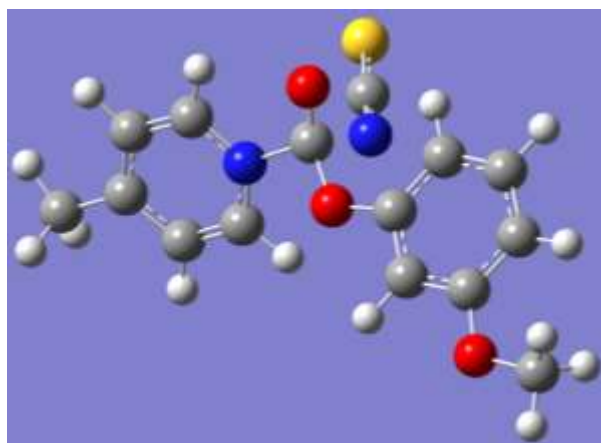

Input orientation:

| Center Number | Atomic Number | Atomic Type | Coordinates (Angstroms) |           |           |
|---------------|---------------|-------------|-------------------------|-----------|-----------|
|               |               |             | X                       | Y         | Z         |
| 1             | 6             | 0           | -0.536431               | 0.267188  | 0.776720  |
| 2             | 8             | 0           | -0.519138               | 0.808744  | 1.866992  |
| 3             | 8             | 0           | 0.468225                | -0.571733 | 0.315456  |
| 4             | 6             | 0           | 1.788572                | -0.159733 | 0.319212  |
| 5             | 6             | 0           | 2.687407                | -1.131966 | -0.101687 |
| 6             | 6             | 0           | 2.220650                | 1.116270  | 0.687989  |
| 7             | 6             | 0           | 4.051482                | -0.837501 | -0.160056 |
| 8             | 1             | 0           | 2.332666                | -2.114217 | -0.385901 |
| 9             | 6             | 0           | 3.583611                | 1.388668  | 0.617581  |
| 10            | 1             | 0           | 1.522978                | 1.866981  | 1.021115  |
| 11            | 6             | 0           | 4.510321                | 0.433498  | 0.200865  |
| 12            | 1             | 0           | 3.936128                | 2.374219  | 0.898466  |
| 13            | 1             | 0           | 5.560381                | 0.684524  | 0.164147  |
| 14            | 7             | 0           | -0.633151               | 1.455956  | -0.535325 |
| 15            | 6             | 0           | -1.474396               | 2.276437  | -0.717324 |
| 16            | 16            | 0           | -2.600767               | 3.392092  | -0.991902 |
| 17            | 6             | 0           | -2.835851               | -0.471140 | 1.299409  |
| 18            | 6             | 0           | -1.934332               | -1.195981 | -0.744190 |
| 19            | 6             | 0           | -4.026111               | -1.115423 | 1.030287  |
| 20            | 1             | 0           | -2.642468               | 0.100729  | 2.195071  |
| 21            | 6             | 0           | -3.101803               | -1.854428 | -1.052483 |
| 22            | 1             | 0           | -1.073271               | -1.172948 | -1.393136 |
| 23            | 6             | 0           | -4.185599               | -1.829271 | -0.161219 |
| 24            | 1             | 0           | -4.828082               | -1.054747 | 1.753321  |
| 25            | 1             | 0           | -3.169853               | -2.385531 | -1.992484 |
| 26            | 7             | 0           | -1.820534               | -0.525304 | 0.421952  |
| 27            | 8             | 0           | 4.854996                | -1.854978 | -0.581822 |
| 28            | 6             | 0           | 6.261448                | -1.615668 | -0.662063 |
| 29            | 1             | 0           | 6.674264                | -1.362989 | 0.318486  |
| 30            | 1             | 0           | 6.700345                | -2.547084 | -1.012839 |
| 31            | 1             | 0           | 6.484503                | -0.815295 | -1.372953 |
| 32            | 6             | 0           | -5.456826               | -2.554300 | -0.476488 |
| 33            | 1             | 0           | -5.748026               | -2.392854 | -1.516181 |
| 34            | 1             | 0           | -5.307893               | -3.630674 | -0.343888 |
| 35            | 1             | 0           | -6.269424               | -2.239456 | 0.177347  |

tssfD25.

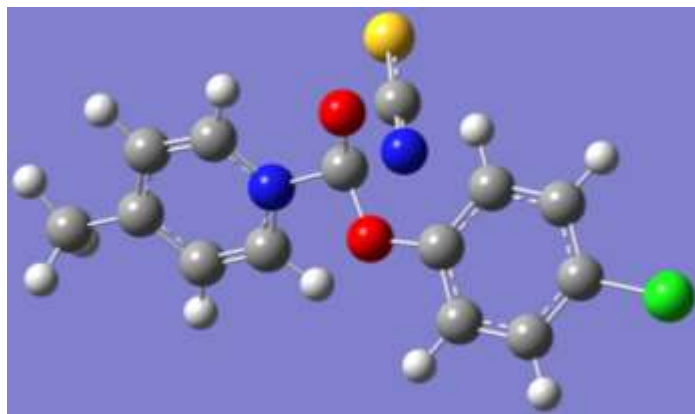

Input orientation:

| Center Number | Atomic Number | Atomic Type | Coordinates (Angstroms) |           |           |
|---------------|---------------|-------------|-------------------------|-----------|-----------|
|               |               |             | X                       | Y         | Z         |
| 1             | 6             | 0           | -0.554263               | -0.032567 | 0.788447  |
| 2             | 8             | 0           | -0.392766               | 0.335423  | 1.936860  |
| 3             | 8             | 0           | 0.273537                | -0.945635 | 0.147898  |
| 4             | 6             | 0           | 1.635465                | -0.733886 | 0.086463  |
| 5             | 6             | 0           | 2.346747                | -1.721515 | -0.594887 |
| 6             | 6             | 0           | 2.293909                | 0.366373  | 0.632984  |
| 7             | 6             | 0           | 3.724877                | -1.615331 | -0.736494 |
| 8             | 1             | 0           | 1.813383                | -2.565871 | -1.012669 |
| 9             | 6             | 0           | 3.676093                | 0.474310  | 0.485832  |
| 10            | 1             | 0           | 1.749503                | 1.127405  | 1.168694  |
| 11            | 6             | 0           | 4.377269                | -0.512816 | -0.193654 |
| 12            | 1             | 0           | 4.280207                | -2.379243 | -1.264170 |
| 13            | 1             | 0           | 4.196506                | 1.325585  | 0.904364  |
| 14            | 7             | 0           | -0.486129               | 1.343070  | -0.348402 |
| 15            | 6             | 0           | -1.180542               | 2.308520  | -0.350529 |
| 16            | 16            | 0           | -2.109521               | 3.622020  | -0.378700 |
| 17            | 6             | 0           | -2.925488               | -0.418186 | 1.345496  |
| 18            | 6             | 0           | -2.239255               | -1.002624 | -0.823983 |
| 19            | 6             | 0           | -4.221787               | -0.797664 | 1.063019  |
| 20            | 1             | 0           | -2.601876               | -0.019811 | 2.295789  |
| 21            | 6             | 0           | -3.516821               | -1.393548 | -1.147733 |
| 22            | 1             | 0           | -1.410467               | -1.043363 | -1.512638 |
| 23            | 6             | 0           | -4.548357               | -1.299601 | -0.200200 |
| 24            | 1             | 0           | -4.974746               | -0.697620 | 1.832740  |
| 25            | 1             | 0           | -3.711377               | -1.769274 | -2.143293 |
| 26            | 7             | 0           | -1.966084               | -0.530421 | 0.411768  |
| 27            | 17            | 0           | 6.126415                | -0.368551 | -0.370645 |
| 28            | 6             | 0           | -5.941309               | -1.730553 | -0.538902 |
| 29            | 1             | 0           | -6.264027               | -1.279925 | -1.480280 |
| 30            | 1             | 0           | -5.970618               | -2.816047 | -0.673645 |
| 31            | 1             | 0           | -6.646355               | -1.460503 | 0.246185  |

tssfD26.

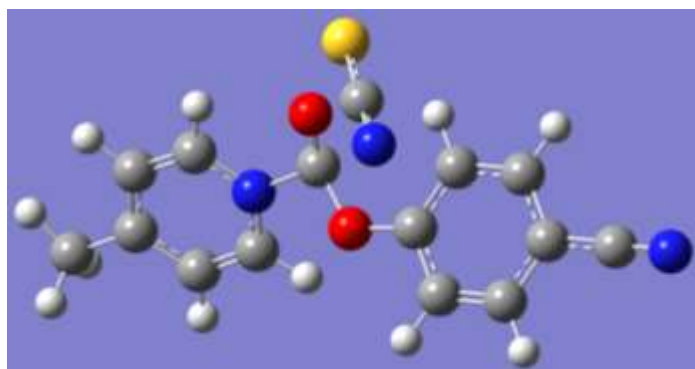

Input orientation:

| Center Number | Atomic Number | Atomic Type | Coordinates (Angstroms) |           |           |
|---------------|---------------|-------------|-------------------------|-----------|-----------|
|               |               |             | X                       | Y         | Z         |
| 1             | 6             | 0           | -0.420544               | -0.008455 | 0.761522  |
| 2             | 8             | 0           | -0.250655               | 0.419102  | 1.884414  |
| 3             | 8             | 0           | 0.408525                | -0.952315 | 0.160690  |
| 4             | 6             | 0           | 1.766035                | -0.765251 | 0.112199  |
| 5             | 6             | 0           | 2.474439                | -1.820074 | -0.469939 |
| 6             | 6             | 0           | 2.427349                | 0.373455  | 0.576975  |
| 7             | 6             | 0           | 3.850356                | -1.742417 | -0.592941 |
| 8             | 1             | 0           | 1.932523                | -2.688213 | -0.821766 |
| 9             | 6             | 0           | 3.807646                | 0.449451  | 0.448264  |
| 10            | 1             | 0           | 1.880088                | 1.182717  | 1.032140  |
| 11            | 6             | 0           | 4.528397                | -0.601770 | -0.133937 |
| 12            | 1             | 0           | 4.401913                | -2.557209 | -1.043222 |
| 13            | 1             | 0           | 4.329392                | 1.328801  | 0.802989  |
| 14            | 7             | 0           | -0.330731               | 1.326825  | -0.465838 |
| 15            | 6             | 0           | -1.030948               | 2.287197  | -0.505921 |
| 16            | 16            | 0           | -1.972510               | 3.590931  | -0.581675 |
| 17            | 6             | 0           | -2.792580               | -0.326302 | 1.320199  |
| 18            | 6             | 0           | -2.098565               | -1.031828 | -0.812460 |
| 19            | 6             | 0           | -4.091696               | -0.700471 | 1.046228  |
| 20            | 1             | 0           | -2.471314               | 0.115460  | 2.251741  |
| 21            | 6             | 0           | -3.379261               | -1.419490 | -1.125418 |
| 22            | 1             | 0           | -1.266309               | -1.119197 | -1.492315 |
| 23            | 6             | 0           | -4.416395               | -1.261867 | -0.192338 |
| 24            | 1             | 0           | -4.848703               | -0.549649 | 1.803530  |
| 25            | 1             | 0           | -3.572016               | -1.842551 | -2.102108 |
| 26            | 7             | 0           | -1.827101               | -0.501234 | 0.400827  |
| 27            | 6             | 0           | 5.946071                | -0.513719 | -0.258795 |
| 28            | 7             | 0           | 7.096183                | -0.442239 | -0.360696 |
| 29            | 6             | 0           | -5.812771               | -1.689019 | -0.520015 |
| 30            | 1             | 0           | -6.122309               | -1.280139 | -1.484617 |
| 31            | 1             | 0           | -5.856259               | -2.779263 | -0.602605 |
| 32            | 1             | 0           | -6.519204               | -1.371539 | 0.245762  |

tssfD31.

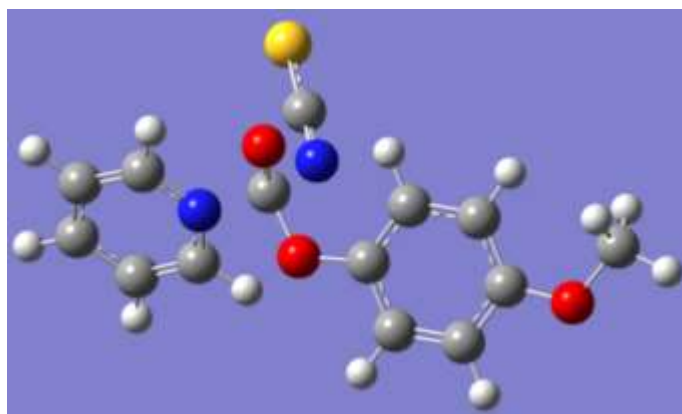

Input orientation:

| Center Number | Atomic Number | Atomic Type | Coordinates (Angstroms) |           |           |
|---------------|---------------|-------------|-------------------------|-----------|-----------|
|               |               |             | X                       | Y         | Z         |
| 1             | 6             | 0           | -0.904422               | -0.171682 | 0.722843  |
| 2             | 8             | 0           | -0.804411               | 0.259742  | 1.856914  |
| 3             | 8             | 0           | -0.059332               | -1.114624 | 0.172965  |
| 4             | 6             | 0           | 1.307815                | -0.879925 | 0.108717  |
| 5             | 6             | 0           | 2.031207                | -1.834783 | -0.608293 |
| 6             | 6             | 0           | 1.957986                | 0.201146  | 0.689268  |
| 7             | 6             | 0           | 3.404098                | -1.707256 | -0.743068 |
| 8             | 1             | 0           | 1.507027                | -2.669704 | -1.056607 |
| 9             | 6             | 0           | 3.342796                | 0.333091  | 0.545382  |
| 10            | 1             | 0           | 1.406996                | 0.938107  | 1.252300  |
| 11            | 6             | 0           | 4.071624                | -0.618415 | -0.167827 |
| 12            | 1             | 0           | 3.974843                | -2.442713 | -1.296523 |
| 13            | 1             | 0           | 3.829960                | 1.182875  | 1.001915  |
| 14            | 7             | 0           | -0.803428               | 1.135725  | -0.475505 |
| 15            | 6             | 0           | -1.494901               | 2.099703  | -0.557058 |
| 16            | 16            | 0           | -2.418423               | 3.410449  | -0.692700 |
| 17            | 6             | 0           | -3.307939               | -0.526906 | 1.200215  |
| 18            | 6             | 0           | -2.526330               | -1.254221 | -0.897263 |
| 19            | 6             | 0           | -4.594618               | -0.927258 | 0.890162  |
| 20            | 1             | 0           | -3.017950               | -0.066597 | 2.133332  |
| 21            | 6             | 0           | -3.792514               | -1.671630 | -1.253227 |
| 22            | 1             | 0           | -1.664477               | -1.338352 | -1.539933 |
| 23            | 6             | 0           | -4.842436               | -1.507863 | -0.350014 |
| 24            | 1             | 0           | -5.382970               | -0.782325 | 1.615101  |
| 25            | 1             | 0           | -3.948700               | -2.115624 | -2.226169 |
| 26            | 1             | 0           | -5.842531               | -1.827271 | -0.613369 |
| 27            | 7             | 0           | -2.314379               | -0.701078 | 0.313602  |
| 28            | 8             | 0           | 5.424214                | -0.576391 | -0.356307 |
| 29            | 6             | 0           | 6.146636                | 0.516968  | 0.209899  |
| 30            | 1             | 0           | 6.047329                | 0.533059  | 1.299221  |
| 31            | 1             | 0           | 7.188622                | 0.355868  | -0.057905 |
| 32            | 1             | 0           | 5.805693                | 1.470661  | -0.203561 |

tssfD32.

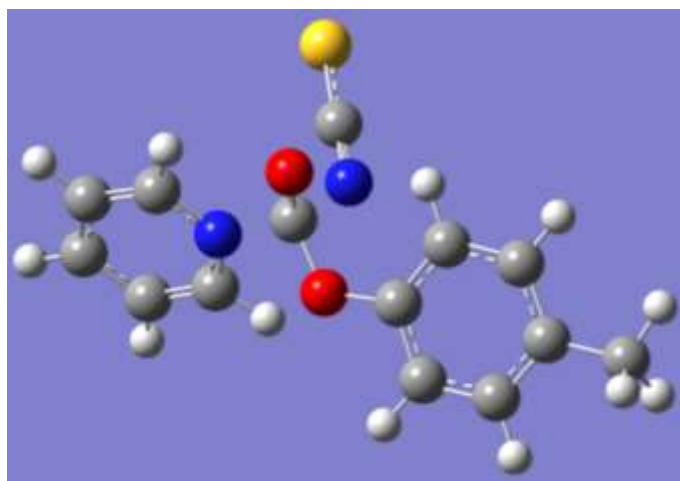

Input orientation:

| Center Number | Atomic Number | Atomic Type | Coordinates (Angstroms) |           |           |
|---------------|---------------|-------------|-------------------------|-----------|-----------|
|               |               |             | X                       | Y         | Z         |
| 1             | 6             | 0           | -0.564381               | -0.155049 | 0.708081  |
| 2             | 8             | 0           | -0.488955               | 0.270745  | 1.845290  |
| 3             | 8             | 0           | 0.337451                | -1.037684 | 0.146500  |
| 4             | 6             | 0           | 1.692295                | -0.742527 | 0.120558  |
| 5             | 6             | 0           | 2.481299                | -1.692028 | -0.528501 |
| 6             | 6             | 0           | 2.269640                | 0.397064  | 0.670741  |
| 7             | 6             | 0           | 3.853293                | -1.498499 | -0.623605 |
| 8             | 1             | 0           | 2.009074                | -2.568950 | -0.954371 |
| 9             | 6             | 0           | 3.650586                | 0.573605  | 0.557721  |
| 10            | 1             | 0           | 1.665934                | 1.132384  | 1.179177  |
| 11            | 6             | 0           | 4.466280                | -0.360623 | -0.081980 |
| 12            | 1             | 0           | 4.457028                | -2.243360 | -1.130987 |
| 13            | 1             | 0           | 4.095629                | 1.465673  | 0.984961  |
| 14            | 7             | 0           | -0.549051               | 1.170483  | -0.482745 |
| 15            | 6             | 0           | -1.278836               | 2.107990  | -0.531580 |
| 16            | 16            | 0           | -2.255075               | 3.384150  | -0.621991 |
| 17            | 6             | 0           | -2.936496               | -0.674104 | 1.184865  |
| 18            | 6             | 0           | -2.115983               | -1.311412 | -0.927299 |
| 19            | 6             | 0           | -4.194103               | -1.156102 | 0.871894  |
| 20            | 1             | 0           | -2.674904               | -0.210935 | 2.124918  |
| 21            | 6             | 0           | -3.352228               | -1.808315 | -1.286127 |
| 22            | 1             | 0           | -1.253293               | -1.326147 | -1.574124 |
| 23            | 6             | 0           | -4.407054               | -1.731789 | -0.377024 |
| 24            | 1             | 0           | -4.987366               | -1.077325 | 1.601682  |
| 25            | 1             | 0           | -3.481873               | -2.245393 | -2.266053 |
| 26            | 1             | 0           | -5.383986               | -2.114568 | -0.642694 |
| 27            | 7             | 0           | -1.937083               | -0.765309 | 0.292228  |
| 28            | 6             | 0           | 5.958516                | -0.166283 | -0.180897 |
| 29            | 1             | 0           | 6.492985                | -0.910188 | 0.418163  |
| 30            | 1             | 0           | 6.304010                | -0.273646 | -1.212763 |
| 31            | 1             | 0           | 6.252111                | 0.822864  | 0.174645  |



tssfD33.

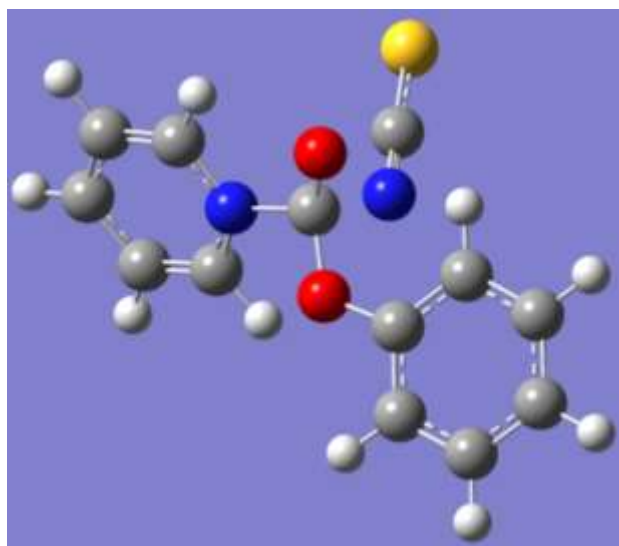

Input orientation:

| Center<br>Number | Atomic<br>Number | Atomic<br>Type | Coordinates (Angstroms) |           |           |
|------------------|------------------|----------------|-------------------------|-----------|-----------|
|                  |                  |                | X                       | Y         | Z         |
| 1                | 6                | 0              | -0.184096               | -0.156918 | 0.689387  |
| 2                | 8                | 0              | -0.087655               | 0.280086  | 1.819790  |
| 3                | 8                | 0              | 0.706088                | -1.048289 | 0.120856  |
| 4                | 6                | 0              | 2.061544                | -0.767305 | 0.078780  |
| 5                | 6                | 0              | 2.833393                | -1.745057 | -0.548731 |
| 6                | 6                | 0              | 2.647892                | 0.386076  | 0.596332  |
| 7                | 6                | 0              | 4.208319                | -1.567915 | -0.659960 |
| 8                | 1                | 0              | 2.346146                | -2.628245 | -0.943049 |
| 9                | 6                | 0              | 4.028468                | 0.549752  | 0.471455  |
| 10               | 1                | 0              | 2.048922                | 1.136289  | 1.087948  |
| 11               | 6                | 0              | 4.813538                | -0.417864 | -0.150827 |
| 12               | 1                | 0              | 4.805541                | -2.329255 | -1.147579 |
| 13               | 1                | 0              | 4.487654                | 1.446411  | 0.871065  |
| 14               | 1                | 0              | 5.884280                | -0.279517 | -0.238138 |
| 15               | 7                | 0              | -0.176689               | 1.162715  | -0.520232 |
| 16               | 6                | 0              | -0.905124               | 2.101729  | -0.560629 |
| 17               | 16               | 0              | -1.881836               | 3.378548  | -0.637736 |
| 18               | 6                | 0              | -2.552911               | -0.644580 | 1.199492  |
| 19               | 6                | 0              | -1.761990               | -1.319002 | -0.913024 |
| 20               | 6                | 0              | -3.818471               | -1.117961 | 0.906751  |
| 21               | 1                | 0              | -2.276608               | -0.171208 | 2.130140  |
| 22               | 6                | 0              | -3.006924               | -1.808504 | -1.250965 |
| 23               | 1                | 0              | -0.907070               | -1.350924 | -1.569388 |
| 24               | 6                | 0              | -4.050864               | -1.708744 | -0.331607 |
| 25               | 1                | 0              | -4.602777               | -1.020977 | 1.643965  |
| 26               | 1                | 0              | -3.151707               | -2.257724 | -2.223240 |
| 27               | 1                | 0              | -5.034401               | -2.085308 | -0.581290 |
| 28               | 7                | 0              | -1.564078               | -0.758247 | 0.297185  |

## tssfD34.

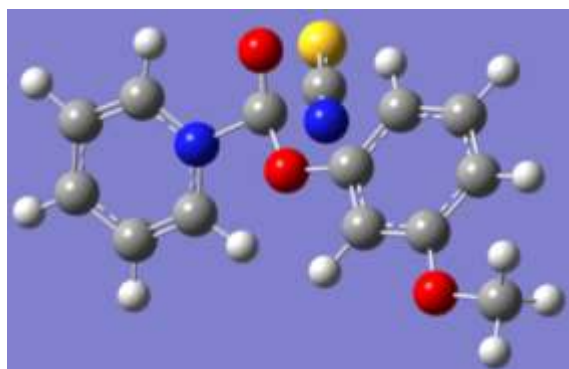

Input orientation:

| Center<br>Number | Atomic<br>Number | Atomic<br>Type | Coordinates (Angstroms) |           |           |
|------------------|------------------|----------------|-------------------------|-----------|-----------|
|                  |                  |                | X                       | Y         | Z         |
| 1                | 6                | 0              | -0.870239               | -0.006311 | 0.735307  |
| 2                | 8                | 0              | -0.948519               | 0.489769  | 1.842141  |
| 3                | 8                | 0              | 0.231701                | -0.697932 | 0.267973  |
| 4                | 6                | 0              | 1.496207                | -0.136701 | 0.325827  |
| 5                | 6                | 0              | 2.509066                | -0.976243 | -0.119550 |
| 6                | 6                | 0              | 1.767751                | 1.159487  | 0.767985  |
| 7                | 6                | 0              | 3.830422                | -0.523437 | -0.128449 |
| 8                | 1                | 0              | 2.276722                | -1.976581 | -0.461123 |
| 9                | 6                | 0              | 3.091023                | 1.590458  | 0.746720  |
| 10               | 1                | 0              | 0.980130                | 1.805976  | 1.118647  |
| 11               | 6                | 0              | 4.130467                | 0.771365  | 0.307032  |
| 12               | 1                | 0              | 3.320716                | 2.594135  | 1.084664  |
| 13               | 1                | 0              | 5.144564                | 1.143315  | 0.308669  |
| 14               | 7                | 0              | -1.080507               | 1.226681  | -0.546474 |
| 15               | 6                | 0              | -1.992463               | 1.978779  | -0.675215 |
| 16               | 16               | 0              | -3.217097               | 3.004588  | -0.872108 |
| 17               | 6                | 0              | -3.095782               | -0.997914 | 1.144898  |
| 18               | 6                | 0              | -2.041036               | -1.561302 | -0.883288 |
| 19               | 6                | 0              | -4.200778               | -1.759635 | 0.813009  |
| 20               | 1                | 0              | -2.992926               | -0.435469 | 2.061148  |
| 21               | 6                | 0              | -3.119369               | -2.336144 | -1.258292 |
| 22               | 1                | 0              | -1.161107               | -1.423902 | -1.491203 |
| 23               | 6                | 0              | -4.214836               | -2.439159 | -0.401188 |
| 24               | 1                | 0              | -5.031927               | -1.813649 | 1.501635  |
| 25               | 1                | 0              | -3.097433               | -2.847094 | -2.210397 |
| 26               | 1                | 0              | -5.070330               | -3.040520 | -0.680307 |
| 27               | 7                | 0              | -2.051652               | -0.920609 | 0.303134  |
| 28               | 8                | 0              | 4.755041                | -1.416872 | -0.581055 |
| 29               | 6                | 0              | 6.124513                | -1.010441 | -0.619198 |
| 30               | 1                | 0              | 6.490480                | -0.765804 | 0.381782  |
| 31               | 1                | 0              | 6.675202                | -1.863233 | -1.009896 |
| 32               | 1                | 0              | 6.261343                | -0.151299 | -1.281646 |

tssfD35.

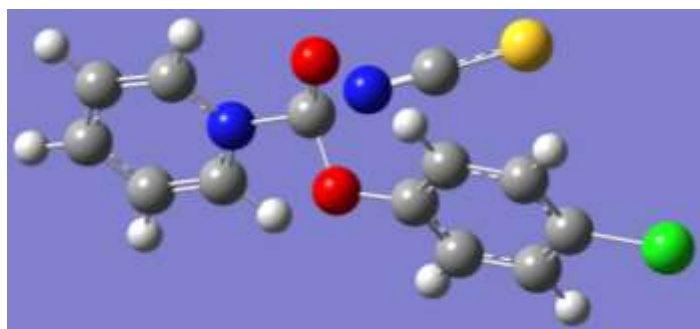

Input orientation:

| Center<br>Number | Atomic<br>Number | Atomic<br>Type | Coordinates (Angstroms) |           |           |
|------------------|------------------|----------------|-------------------------|-----------|-----------|
|                  |                  |                | X                       | Y         | Z         |
| 1                | 6                | 0              | -1.103745               | -0.092312 | 0.601117  |
| 2                | 8                | 0              | -1.100807               | 0.643490  | 1.565186  |
| 3                | 8                | 0              | -0.125326               | -1.048509 | 0.334082  |
| 4                | 6                | 0              | 1.194642                | -0.621782 | 0.252580  |
| 5                | 6                | 0              | 1.881829                | -0.946661 | -0.911776 |
| 6                | 6                | 0              | 1.817694                | 0.065887  | 1.289687  |
| 7                | 6                | 0              | 3.212316                | -0.568331 | -1.055804 |
| 8                | 1                | 0              | 1.369996                | -1.479638 | -1.702400 |
| 9                | 6                | 0              | 3.146746                | 0.455079  | 1.144279  |
| 10               | 1                | 0              | 1.270840                | 0.304357  | 2.189529  |
| 11               | 6                | 0              | 3.826240                | 0.137182  | -0.026396 |
| 12               | 1                | 0              | 3.756648                | -0.808580 | -1.959186 |
| 13               | 1                | 0              | 3.645663                | 0.996464  | 1.936991  |
| 14               | 7                | 0              | -1.058821               | 0.871454  | -0.942951 |
| 15               | 6                | 0              | -0.253850               | 1.694447  | -1.240048 |
| 16               | 16               | 0              | 0.803372                | 2.830210  | -1.681754 |
| 17               | 6                | 0              | -3.436321               | -0.658222 | 1.153691  |
| 18               | 6                | 0              | -2.522980               | -1.635721 | -0.784082 |
| 19               | 6                | 0              | -4.645432               | -1.291348 | 0.936005  |
| 20               | 1                | 0              | -3.233460               | 0.003570  | 1.982614  |
| 21               | 6                | 0              | -3.709211               | -2.290959 | -1.043553 |
| 22               | 1                | 0              | -1.648639               | -1.707589 | -1.410480 |
| 23               | 6                | 0              | -4.785920               | -2.118986 | -0.174300 |
| 24               | 1                | 0              | -5.458075               | -1.132473 | 1.630495  |
| 25               | 1                | 0              | -3.784458               | -2.921941 | -1.917704 |
| 26               | 1                | 0              | -5.724757               | -2.623260 | -0.363577 |
| 27               | 7                | 0              | -2.413629               | -0.845923 | 0.302436  |
| 28               | 17               | 0              | 5.506899                | 0.635122  | -0.208059 |

tssfD36.

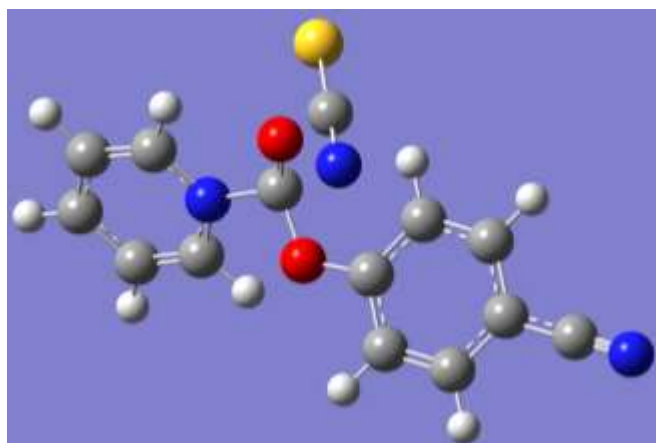

Input orientation:

| Center Number | Atomic Number | Atomic Type | Coordinates (Angstroms) |           |           |
|---------------|---------------|-------------|-------------------------|-----------|-----------|
|               |               |             | X                       | Y         | Z         |
| 1             | 6             | 0           | -0.737066               | -0.150059 | 0.687332  |
| 2             | 8             | 0           | -0.633174               | 0.303484  | 1.806252  |
| 3             | 8             | 0           | 0.179862                | -1.017579 | 0.110811  |
| 4             | 6             | 0           | 1.519759                | -0.719660 | 0.098758  |
| 5             | 6             | 0           | 2.327749                | -1.719543 | -0.448572 |
| 6             | 6             | 0           | 2.070297                | 0.475174  | 0.565665  |
| 7             | 6             | 0           | 3.695819                | -1.530603 | -0.532925 |
| 8             | 1             | 0           | 1.868866                | -2.633020 | -0.803667 |
| 9             | 6             | 0           | 3.443199                | 0.662193  | 0.476544  |
| 10            | 1             | 0           | 1.445206                | 1.242971  | 0.991635  |
| 11            | 6             | 0           | 4.264154                | -0.333406 | -0.069447 |
| 12            | 1             | 0           | 4.325496                | -2.302228 | -0.955836 |
| 13            | 1             | 0           | 3.880693                | 1.585382  | 0.833712  |
| 14            | 7             | 0           | -0.745670               | 1.187061  | -0.560004 |
| 15            | 6             | 0           | -1.556344               | 2.054705  | -0.628896 |
| 16            | 16            | 0           | -2.653368               | 3.228062  | -0.737697 |
| 17            | 6             | 0           | -3.091678               | -0.644144 | 1.193046  |
| 18            | 6             | 0           | -2.280615               | -1.345188 | -0.906057 |
| 19            | 6             | 0           | -4.351076               | -1.130300 | 0.897632  |
| 20            | 1             | 0           | -2.826964               | -0.155198 | 2.118709  |
| 21            | 6             | 0           | -3.519827               | -1.846972 | -1.244154 |
| 22            | 1             | 0           | -1.422521               | -1.379831 | -1.557791 |
| 23            | 6             | 0           | -4.570746               | -1.740800 | -0.333422 |
| 24            | 1             | 0           | -5.141188               | -1.027036 | 1.627667  |
| 25            | 1             | 0           | -3.654866               | -2.310778 | -2.210886 |
| 26            | 1             | 0           | -5.550104               | -2.127099 | -0.584437 |
| 27            | 7             | 0           | -2.094294               | -0.765398 | 0.298637  |
| 28            | 6             | 0           | 5.673334                | -0.131768 | -0.152935 |
| 29            | 7             | 0           | 6.816506                | 0.031417  | -0.220966 |

tssfD41.

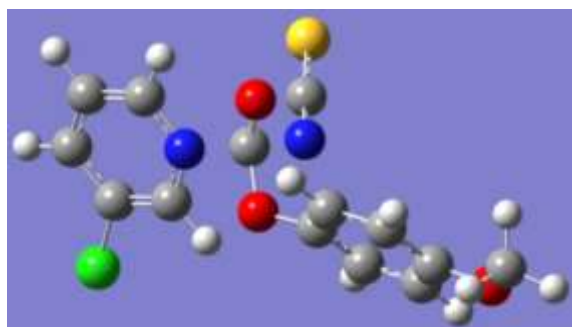

Input orientation:

| Center<br>Number | Atomic<br>Number | Atomic<br>Type | Coordinates (Angstroms) |           |           |
|------------------|------------------|----------------|-------------------------|-----------|-----------|
|                  |                  |                | X                       | Y         | Z         |
| 1                | 6                | 0              | -0.350293               | 0.480254  | 0.597530  |
| 2                | 8                | 0              | -0.023020               | 1.481281  | 1.199874  |
| 3                | 8                | 0              | 0.351559                | -0.710701 | 0.603380  |
| 4                | 6                | 0              | 1.711880                | -0.636392 | 0.292153  |
| 5                | 6                | 0              | 2.132511                | -1.147873 | -0.932388 |
| 6                | 6                | 0              | 2.625157                | -0.126159 | 1.201772  |
| 7                | 6                | 0              | 3.483509                | -1.145211 | -1.247359 |
| 8                | 1                | 0              | 1.400810                | -1.540722 | -1.626045 |
| 9                | 6                | 0              | 3.985163                | -0.116285 | 0.886658  |
| 10               | 1                | 0              | 2.282072                | 0.262003  | 2.151110  |
| 11               | 6                | 0              | 4.417128                | -0.625630 | -0.341304 |
| 12               | 1                | 0              | 3.833329                | -1.539796 | -2.193279 |
| 13               | 1                | 0              | 4.687117                | 0.284303  | 1.603867  |
| 14               | 7                | 0              | -0.475890               | 0.812679  | -1.157066 |
| 15               | 6                | 0              | -1.206630               | 1.584244  | -1.690837 |
| 16               | 16               | 0              | -2.194211               | 2.618180  | -2.430838 |
| 17               | 6                | 0              | -2.636203               | 0.814880  | 1.500815  |
| 18               | 6                | 0              | -2.265323               | -1.136542 | 0.236012  |
| 19               | 6                | 0              | -3.968043               | 0.481516  | 1.675377  |
| 20               | 1                | 0              | -2.169790               | 1.705153  | 1.895749  |
| 21               | 6                | 0              | -3.588864               | -1.502508 | 0.389669  |
| 22               | 1                | 0              | -1.543304               | -1.713191 | -0.319391 |
| 23               | 6                | 0              | -4.459339               | -0.691359 | 1.117051  |
| 24               | 1                | 0              | -4.610664               | 1.137995  | 2.244337  |
| 25               | 1                | 0              | -5.496463               | -0.973992 | 1.237523  |
| 26               | 7                | 0              | -1.829884               | 0.005296  | 0.798614  |
| 27               | 8                | 0              | 5.720143                | -0.662454 | -0.741558 |
| 28               | 6                | 0              | 6.713076                | -0.137020 | 0.140941  |
| 29               | 1                | 0              | 6.736350                | -0.692310 | 1.082909  |
| 30               | 1                | 0              | 7.662639                | -0.257075 | -0.375820 |
| 31               | 1                | 0              | 6.537497                | 0.923353  | 0.343020  |
| 32               | 17               | 0              | -4.147359               | -2.978785 | -0.337475 |

tssfD42.

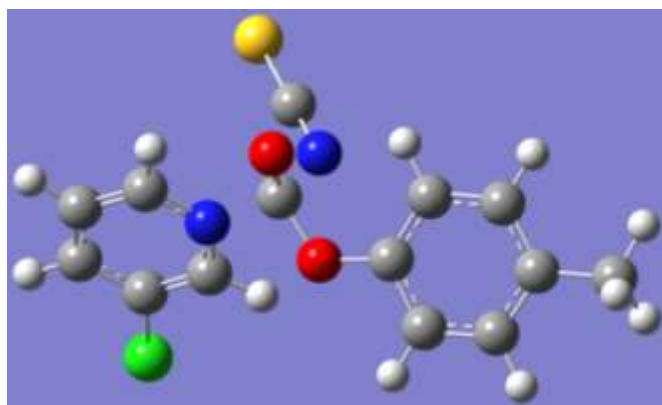

Input orientation:

| Center Number | Atomic Number | Atomic Type | Coordinates (Angstroms) |           |           |
|---------------|---------------|-------------|-------------------------|-----------|-----------|
|               |               |             | X                       | Y         | Z         |
| 1             | 6             | 0           | -0.015297               | 0.355502  | 0.937800  |
| 2             | 8             | 0           | 0.274185                | 0.985085  | 1.934073  |
| 3             | 8             | 0           | 0.660571                | -0.749812 | 0.478890  |
| 4             | 6             | 0           | 2.036728                | -0.710770 | 0.292184  |
| 5             | 6             | 0           | 2.602696                | -1.919267 | -0.109368 |
| 6             | 6             | 0           | 2.827263                | 0.421689  | 0.456647  |
| 7             | 6             | 0           | 3.970271                | -1.992848 | -0.343792 |
| 8             | 1             | 0           | 1.965344                | -2.785535 | -0.237946 |
| 9             | 6             | 0           | 4.198274                | 0.324912  | 0.211757  |
| 10            | 1             | 0           | 2.394202                | 1.359458  | 0.767440  |
| 11            | 6             | 0           | 4.795981                | -0.872372 | -0.186184 |
| 12            | 1             | 0           | 4.401465                | -2.937311 | -0.657573 |
| 13            | 1             | 0           | 4.811042                | 1.211082  | 0.336797  |
| 14            | 7             | 0           | -0.002462               | 1.410922  | -0.519556 |
| 15            | 6             | 0           | -0.704181               | 2.351033  | -0.716763 |
| 16            | 16            | 0           | -1.653771               | 3.618065  | -1.003465 |
| 17            | 6             | 0           | -2.357224               | 0.374123  | 1.751867  |
| 18            | 6             | 0           | -1.925800               | -0.850309 | -0.212937 |
| 19            | 6             | 0           | -3.704377               | 0.065356  | 1.681013  |
| 20            | 1             | 0           | -1.906620               | 0.979768  | 2.523966  |
| 21            | 6             | 0           | -3.263953               | -1.178556 | -0.316906 |
| 22            | 1             | 0           | -1.174866               | -1.165736 | -0.919361 |
| 23            | 6             | 0           | -4.172833               | -0.721295 | 0.637032  |
| 24            | 1             | 0           | -4.376728               | 0.441164  | 2.438866  |
| 25            | 1             | 0           | -5.221407               | -0.974623 | 0.557738  |
| 26            | 7             | 0           | -1.513967               | -0.090433 | 0.818162  |
| 27            | 6             | 0           | 6.283081                | -0.967976 | -0.417158 |
| 28            | 1             | 0           | 6.784194                | -1.428650 | 0.440594  |
| 29            | 1             | 0           | 6.509361                | -1.581255 | -1.292724 |
| 30            | 1             | 0           | 6.724500                | 0.019038  | -0.566902 |
| 31            | 17            | 0           | -3.792231               | -2.160069 | -1.650006 |

tssfD43.

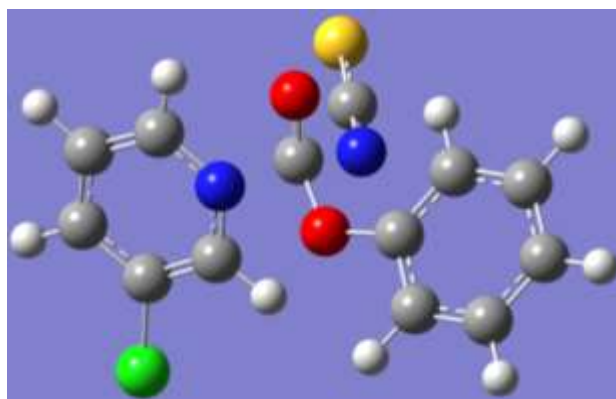

Input orientation:

| Center<br>Number | Atomic<br>Number | Atomic<br>Type | Coordinates (Angstroms) |           |           |
|------------------|------------------|----------------|-------------------------|-----------|-----------|
|                  |                  |                | X                       | Y         | Z         |
| 1                | 6                | 0              | 0.376135                | 0.258264  | 0.884251  |
| 2                | 8                | 0              | 0.750978                | 0.869422  | 1.862514  |
| 3                | 8                | 0              | 0.958252                | -0.891264 | 0.402247  |
| 4                | 6                | 0              | 2.325796                | -0.951908 | 0.176331  |
| 5                | 6                | 0              | 2.794032                | -2.212849 | -0.190047 |
| 6                | 6                | 0              | 3.189919                | 0.135992  | 0.274841  |
| 7                | 6                | 0              | 4.146888                | -2.388840 | -0.461024 |
| 8                | 1                | 0              | 2.094190                | -3.036359 | -0.259392 |
| 9                | 6                | 0              | 4.543843                | -0.058235 | -0.003126 |
| 10               | 1                | 0              | 2.823595                | 1.108661  | 0.562613  |
| 11               | 6                | 0              | 5.029285                | -1.311425 | -0.368793 |
| 12               | 1                | 0              | 4.509780                | -3.369513 | -0.744854 |
| 13               | 1                | 0              | 5.219934                | 0.785393  | 0.071290  |
| 14               | 1                | 0              | 6.082794                | -1.448739 | -0.579631 |
| 15               | 7                | 0              | 0.397822                | 1.307990  | -0.587497 |
| 16               | 6                | 0              | -0.175458               | 2.342065  | -0.718068 |
| 17               | 16               | 0              | -0.949487               | 3.739508  | -0.912450 |
| 18               | 6                | 0              | -1.921210               | 0.438527  | 1.790498  |
| 19               | 6                | 0              | -1.652136               | -0.809261 | -0.189255 |
| 20               | 6                | 0              | -3.287970               | 0.222810  | 1.772624  |
| 21               | 1                | 0              | -1.400489               | 1.010766  | 2.543670  |
| 22               | 6                | 0              | -3.012413               | -1.045944 | -0.239403 |
| 23               | 1                | 0              | -0.953055               | -1.173309 | -0.924845 |
| 24               | 6                | 0              | -3.849686               | -0.528539 | 0.748693  |
| 25               | 1                | 0              | -3.902698               | 0.642156  | 2.556121  |
| 26               | 1                | 0              | -4.915361               | -0.709938 | 0.710975  |
| 27               | 7                | 0              | -1.149137               | -0.080587 | 0.824036  |
| 28               | 17               | 0              | -3.658246               | -1.988820 | -1.548023 |

tssfD44.

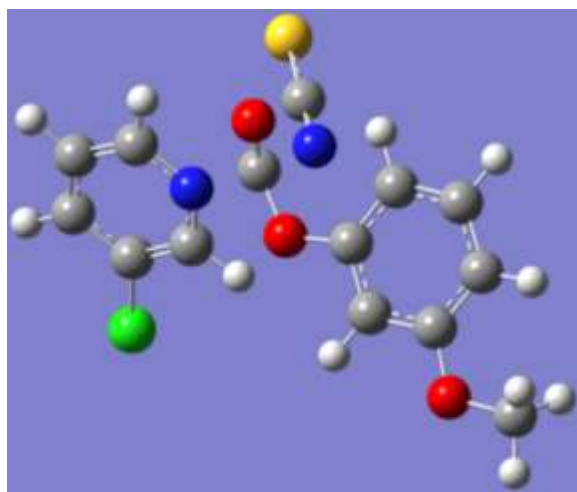

Input orientation:

| Center<br>Number | Atomic<br>Number | Atomic<br>Type | Coordinates (Angstroms) |           |           |
|------------------|------------------|----------------|-------------------------|-----------|-----------|
|                  |                  |                | X                       | Y         | Z         |
| 1                | 6                | 0              | -0.389095               | 0.626963  | 0.965373  |
| 2                | 8                | 0              | -0.296860               | 1.395225  | 1.898510  |
| 3                | 8                | 0              | 0.539204                | -0.332118 | 0.634994  |
| 4                | 6                | 0              | 1.874041                | 0.000467  | 0.457461  |
| 5                | 6                | 0              | 2.688054                | -1.080938 | 0.149207  |
| 6                | 6                | 0              | 2.385435                | 1.295132  | 0.556513  |
| 7                | 6                | 0              | 4.053173                | -0.878437 | -0.067188 |
| 8                | 1                | 0              | 2.268179                | -2.075516 | 0.073383  |
| 9                | 6                | 0              | 3.747513                | 1.473479  | 0.332301  |
| 10               | 1                | 0              | 1.749080                | 2.129848  | 0.801084  |
| 11               | 6                | 0              | 4.593165                | 0.408751  | 0.023223  |
| 12               | 1                | 0              | 4.164073                | 2.471318  | 0.402925  |
| 13               | 1                | 0              | 5.645471                | 0.589562  | -0.140664 |
| 14               | 7                | 0              | -0.536763               | 1.524561  | -0.602192 |
| 15               | 6                | 0              | -1.406390               | 2.279152  | -0.900005 |
| 16               | 16               | 0              | -2.581538               | 3.295829  | -1.321345 |
| 17               | 6                | 0              | -2.717800               | 0.197922  | 1.691992  |
| 18               | 6                | 0              | -1.917203               | -1.072135 | -0.123299 |
| 19               | 6                | 0              | -3.958994               | -0.407824 | 1.603306  |
| 20               | 1                | 0              | -2.455796               | 0.955924  | 2.414953  |
| 21               | 6                | 0              | -3.142961               | -1.698342 | -0.241419 |
| 22               | 1                | 0              | -1.076801               | -1.274814 | -0.767492 |
| 23               | 6                | 0              | -4.183255               | -1.369906 | 0.627395  |
| 24               | 1                | 0              | -4.740004               | -0.124073 | 2.294007  |
| 25               | 1                | 0              | -5.144784               | -1.856627 | 0.535070  |
| 26               | 7                | 0              | -1.741019               | -0.149760 | 0.840653  |
| 27               | 8                | 0              | 4.773812                | -1.996624 | -0.361814 |
| 28               | 6                | 0              | 6.177293                | -1.854559 | -0.591614 |
| 29               | 1                | 0              | 6.682353                | -1.458851 | 0.293825  |
| 30               | 1                | 0              | 6.544836                | -2.856019 | -0.803893 |
| 31               | 1                | 0              | 6.371591                | -1.203680 | -1.448466 |
| 32               | 17               | 0              | -3.366181               | -2.890445 | -1.485336 |



## tssfD45.

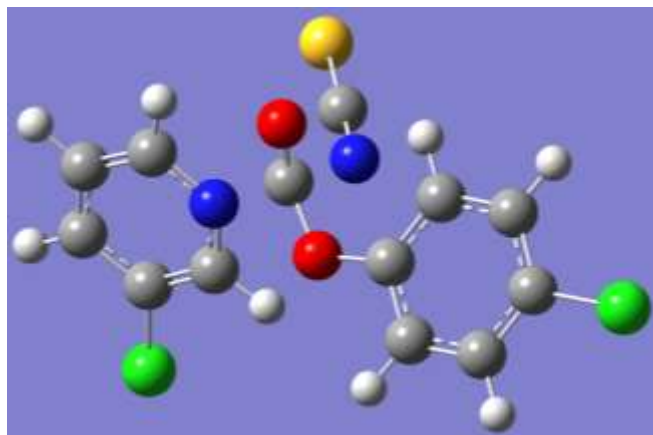

Input orientation:

| Center<br>Number | Atomic<br>Number | Atomic<br>Type | Coordinates (Angstroms) |           |           |
|------------------|------------------|----------------|-------------------------|-----------|-----------|
|                  |                  |                | X                       | Y         | Z         |
| 1                | 6                | 0              | -0.347589               | 0.391628  | 0.947422  |
| 2                | 8                | 0              | -0.081226               | 1.062459  | 1.920827  |
| 3                | 8                | 0              | 0.380642                | -0.694207 | 0.514775  |
| 4                | 6                | 0              | 1.747339                | -0.596009 | 0.324401  |
| 5                | 6                | 0              | 2.366699                | -1.787631 | -0.048464 |
| 6                | 6                | 0              | 2.482658                | 0.578472  | 0.464456  |
| 7                | 6                | 0              | 3.735669                | -1.813555 | -0.284988 |
| 8                | 1                | 0              | 1.771628                | -2.685826 | -0.152984 |
| 9                | 6                | 0              | 3.855593                | 0.551424  | 0.223778  |
| 10               | 1                | 0              | 2.006750                | 1.500492  | 0.757669  |
| 11               | 6                | 0              | 4.468008                | -0.638655 | -0.146083 |
| 12               | 1                | 0              | 4.222555                | -2.735405 | -0.573862 |
| 13               | 1                | 0              | 4.437678                | 1.457458  | 0.328168  |
| 14               | 7                | 0              | -0.363246               | 1.413581  | -0.558682 |
| 15               | 6                | 0              | -1.108520               | 2.316288  | -0.770793 |
| 16               | 16               | 0              | -2.120513               | 3.530835  | -1.072523 |
| 17               | 6                | 0              | -2.689512               | 0.360967  | 1.736139  |
| 18               | 6                | 0              | -2.191391               | -0.921503 | -0.176927 |
| 19               | 6                | 0              | -4.023832               | 0.002968  | 1.661237  |
| 20               | 1                | 0              | -2.270520               | 1.010157  | 2.490244  |
| 21               | 6                | 0              | -3.515660               | -1.300556 | -0.282057 |
| 22               | 1                | 0              | -1.422321               | -1.235875 | -0.863766 |
| 23               | 6                | 0              | -4.451643               | -0.838950 | 0.643284  |
| 24               | 1                | 0              | -4.718030               | 0.383916  | 2.396424  |
| 25               | 1                | 0              | -5.489746               | -1.131613 | 0.561875  |
| 26               | 7                | 0              | -1.818428               | -0.109228 | 0.829784  |
| 27               | 17               | 0              | 6.205704                | -0.662903 | -0.443950 |
| 28               | 17               | 0              | -3.992692               | -2.350671 | -1.581089 |

tssfD46.

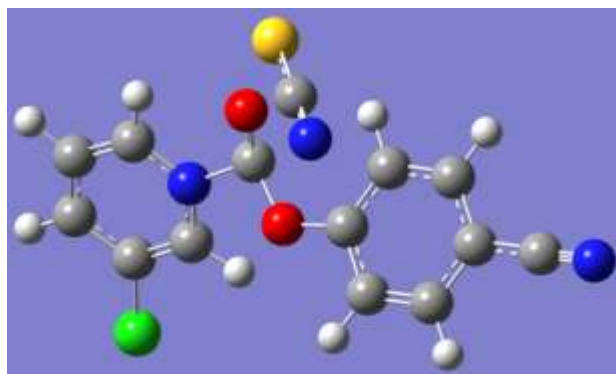

Input orientation:

| Center Number | Atomic Number | Atomic Type | Coordinates (Angstroms) |           |           |
|---------------|---------------|-------------|-------------------------|-----------|-----------|
|               |               |             | X                       | Y         | Z         |
| 1             | 6             | 0           | -0.219353               | 0.365749  | 0.965194  |
| 2             | 8             | 0           | 0.057375                | 1.030113  | 1.936895  |
| 3             | 8             | 0           | 0.506067                | -0.721815 | 0.519942  |
| 4             | 6             | 0           | 1.866124                | -0.635541 | 0.335401  |
| 5             | 6             | 0           | 2.474605                | -1.836863 | -0.034122 |
| 6             | 6             | 0           | 2.609157                | 0.536838  | 0.476680  |
| 7             | 6             | 0           | 3.838529                | -1.873643 | -0.265537 |
| 8             | 1             | 0           | 1.868024                | -2.727050 | -0.137067 |
| 9             | 6             | 0           | 3.976884                | 0.496374  | 0.240690  |
| 10            | 1             | 0           | 2.136184                | 1.461177  | 0.765808  |
| 11            | 6             | 0           | 4.600460                | -0.702419 | -0.129392 |
| 12            | 1             | 0           | 4.315736                | -2.801708 | -0.551420 |
| 13            | 1             | 0           | 4.563690                | 1.399605  | 0.345250  |
| 14            | 7             | 0           | -0.210224               | 1.406624  | -0.560759 |
| 15            | 6             | 0           | -0.960471               | 2.307942  | -0.760742 |
| 16            | 16            | 0           | -1.983833               | 3.518886  | -1.041352 |
| 17            | 6             | 0           | -2.561229               | 0.377905  | 1.726901  |
| 18            | 6             | 0           | -2.062394               | -0.913410 | -0.182020 |
| 19            | 6             | 0           | -3.900391               | 0.044440  | 1.634170  |
| 20            | 1             | 0           | -2.141186               | 1.019026  | 2.487062  |
| 21            | 6             | 0           | -3.391827               | -1.267532 | -0.303629 |
| 22            | 1             | 0           | -1.291643               | -1.241068 | -0.860497 |
| 23            | 6             | 0           | -4.330678               | -0.788807 | 0.610250  |
| 24            | 1             | 0           | -4.596602               | 0.438077  | 2.360659  |
| 25            | 1             | 0           | -5.372959               | -1.061866 | 0.515368  |
| 26            | 7             | 0           | -1.686723               | -0.108385 | 0.830777  |
| 27            | 6             | 0           | 6.006495                | -0.732780 | -0.366598 |
| 28            | 7             | 0           | 7.146733                | -0.757795 | -0.559186 |
| 29            | 17            | 0           | -3.871937               | -2.307770 | -1.608725 |

tssfD51.

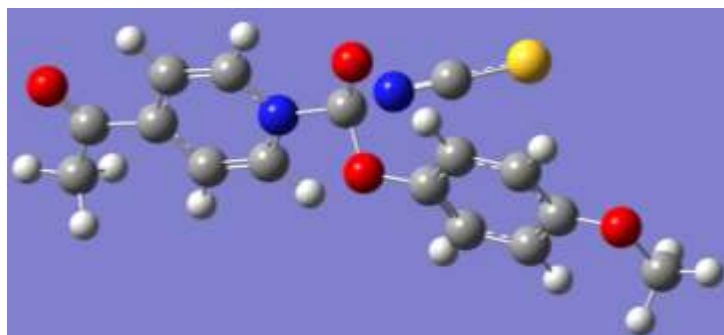

Input orientation:

| Center Number | Atomic Number | Atomic Type | Coordinates (Angstroms) |           |           |
|---------------|---------------|-------------|-------------------------|-----------|-----------|
|               |               |             | X                       | Y         | Z         |
| 1             | 6             | 0           | -0.246142               | 0.025769  | 0.943093  |
| 2             | 8             | 0           | -0.055028               | 0.406161  | 2.078774  |
| 3             | 8             | 0           | 0.405180                | -1.039211 | 0.340323  |
| 4             | 6             | 0           | 1.800812                | -1.010456 | 0.303918  |
| 5             | 6             | 0           | 2.571707                | -0.934966 | 1.462969  |
| 6             | 6             | 0           | 2.399936                | -1.099480 | -0.942629 |
| 7             | 6             | 0           | 3.954825                | -0.926380 | 1.356031  |
| 8             | 1             | 0           | 2.093464                | -0.872748 | 2.429546  |
| 9             | 6             | 0           | 3.789829                | -1.103691 | -1.052408 |
| 10            | 1             | 0           | 1.780211                | -1.153885 | -1.828578 |
| 11            | 6             | 0           | 4.572380                | -1.005841 | 0.101367  |
| 12            | 1             | 0           | 4.575310                | -0.862058 | 2.241354  |
| 13            | 1             | 0           | 4.240642                | -1.170249 | -2.032078 |
| 14            | 7             | 0           | 0.089494                | 1.359672  | -0.245709 |
| 15            | 6             | 0           | 1.104559                | 1.970733  | -0.346285 |
| 16            | 16            | 0           | 2.450035                | 2.845557  | -0.512204 |
| 17            | 6             | 0           | -2.662118               | 0.000930  | 1.471043  |
| 18            | 6             | 0           | -2.043101               | -0.543895 | -0.730234 |
| 19            | 6             | 0           | -3.998050               | -0.156685 | 1.163026  |
| 20            | 1             | 0           | -2.288943               | 0.286551  | 2.443502  |
| 21            | 6             | 0           | -3.366162               | -0.711978 | -1.089169 |
| 22            | 1             | 0           | -1.219409               | -0.668871 | -1.414467 |
| 23            | 6             | 0           | -4.366878               | -0.516509 | -0.133902 |
| 24            | 1             | 0           | -4.751221               | 0.001223  | 1.921372  |
| 25            | 1             | 0           | -3.591518               | -0.987804 | -2.108616 |
| 26            | 7             | 0           | -1.725400               | -0.197916 | 0.529160  |
| 27            | 8             | 0           | 5.935527                | -0.986596 | 0.105580  |
| 28            | 6             | 0           | 6.614858                | -1.048125 | -1.149628 |
| 29            | 1             | 0           | 6.347439                | -0.197414 | -1.782728 |
| 30            | 1             | 0           | 7.676172                | -1.008494 | -0.914810 |
| 31            | 1             | 0           | 6.390429                | -1.981831 | -1.672975 |
| 32            | 6             | 0           | -5.841245               | -0.674509 | -0.452266 |
| 33            | 8             | 0           | -6.652154               | -0.520236 | 0.439020  |
| 34            | 6             | 0           | -6.237864               | -1.013925 | -1.860306 |
| 35            | 1             | 0           | -5.863176               | -0.258406 | -2.556401 |
| 36            | 1             | 0           | -5.805927               | -1.974072 | -2.156901 |
| 37            | 1             | 0           | -7.322318               | -1.067679 | -1.926806 |

## tssfD52.

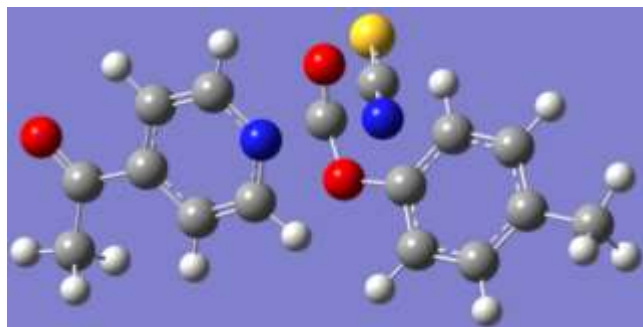

Input orientation:

| Center Number | Atomic Number | Atomic Type | Coordinates (Angstroms) |           |           |
|---------------|---------------|-------------|-------------------------|-----------|-----------|
|               |               |             | X                       | Y         | Z         |
| 1             | 6             | 0           | 0.377332                | 0.300380  | 0.698325  |
| 2             | 8             | 0           | 0.612600                | 0.937248  | 1.706077  |
| 3             | 8             | 0           | 1.037472                | -0.848447 | 0.324183  |
| 4             | 6             | 0           | 2.420766                | -0.864563 | 0.207961  |
| 5             | 6             | 0           | 2.953805                | -2.083370 | -0.209244 |
| 6             | 6             | 0           | 3.252513                | 0.219671  | 0.466573  |
| 7             | 6             | 0           | 4.327561                | -2.214708 | -0.367483 |
| 8             | 1             | 0           | 2.285988                | -2.913491 | -0.404642 |
| 9             | 6             | 0           | 4.629901                | 0.065962  | 0.295166  |
| 10            | 1             | 0           | 2.846268                | 1.161939  | 0.799261  |
| 11            | 6             | 0           | 5.193563                | -1.141054 | -0.121309 |
| 12            | 1             | 0           | 4.732570                | -3.168133 | -0.689252 |
| 13            | 1             | 0           | 5.275154                | 0.913787  | 0.498142  |
| 14            | 7             | 0           | 0.566458                | 1.313306  | -0.765278 |
| 15            | 6             | 0           | -0.043800               | 2.300619  | -1.026452 |
| 16            | 16            | 0           | -0.865763               | 3.632459  | -1.398159 |
| 17            | 6             | 0           | -2.021576               | 0.473356  | 1.292746  |
| 18            | 6             | 0           | -1.491605               | -0.861462 | -0.568965 |
| 19            | 6             | 0           | -3.368844               | 0.231876  | 1.115730  |
| 20            | 1             | 0           | -1.608806               | 1.091242  | 2.076576  |
| 21            | 6             | 0           | -2.827565               | -1.135698 | -0.785413 |
| 22            | 1             | 0           | -0.697079               | -1.244263 | -1.189382 |
| 23            | 6             | 0           | -3.789460               | -0.585281 | 0.065983  |
| 24            | 1             | 0           | -4.090996               | 0.672861  | 1.787559  |
| 25            | 1             | 0           | -3.094294               | -1.772054 | -1.616179 |
| 26            | 7             | 0           | -1.122310               | -0.076596 | 0.459612  |
| 27            | 6             | 0           | 6.681566                | -1.287967 | -0.316715 |
| 28            | 1             | 0           | 7.053011                | -2.206934 | 0.144103  |
| 29            | 1             | 0           | 6.935368                | -1.333607 | -1.380695 |
| 30            | 1             | 0           | 7.222168                | -0.445584 | 0.118359  |
| 31            | 6             | 0           | -5.273869               | -0.837773 | -0.108567 |
| 32            | 8             | 0           | -6.051977               | -0.316216 | 0.665188  |
| 33            | 6             | 0           | -5.721190               | -1.724932 | -1.234812 |
| 34            | 1             | 0           | -5.403933               | -1.309878 | -2.195724 |
| 35            | 1             | 0           | -5.269729               | -2.716686 | -1.142697 |
| 36            | 1             | 0           | -6.805254               | -1.813299 | -1.216499 |

tssfD53.

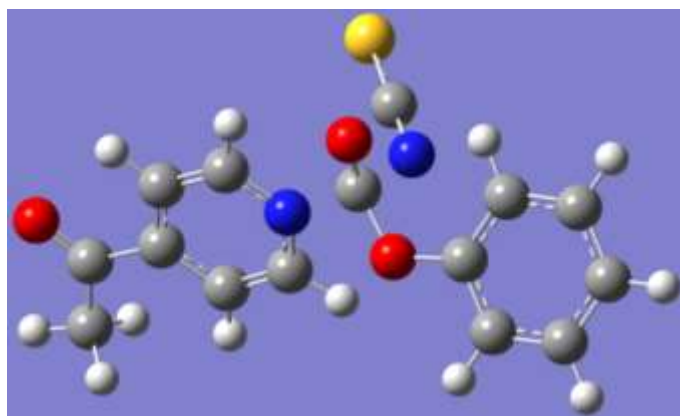

Input orientation:

| Center Number | Atomic Number | Atomic Type | Coordinates (Angstroms) |           |           |
|---------------|---------------|-------------|-------------------------|-----------|-----------|
|               |               |             | X                       | Y         | Z         |
| 1             | 6             | 0           | 0.742675                | 0.056918  | 0.784778  |
| 2             | 8             | 0           | 1.012364                | 0.507077  | 1.879805  |
| 3             | 8             | 0           | 1.346888                | -1.044030 | 0.217909  |
| 4             | 6             | 0           | 2.725526                | -1.109336 | 0.087528  |
| 5             | 6             | 0           | 3.191441                | -2.272359 | -0.524595 |
| 6             | 6             | 0           | 3.606885                | -0.115586 | 0.507590  |
| 7             | 6             | 0           | 4.557831                | -2.444597 | -0.718829 |
| 8             | 1             | 0           | 2.478613                | -3.023207 | -0.842300 |
| 9             | 6             | 0           | 4.974394                | -0.303043 | 0.300293  |
| 10            | 1             | 0           | 3.242239                | 0.779180  | 0.986809  |
| 11            | 6             | 0           | 5.456981                | -1.459349 | -0.307840 |
| 12            | 1             | 0           | 4.918177                | -3.348972 | -1.194508 |
| 13            | 1             | 0           | 5.663549                | 0.468240  | 0.623727  |
| 14            | 1             | 0           | 6.521011                | -1.592999 | -0.460155 |
| 15            | 7             | 0           | 0.983557                | 1.291242  | -0.499751 |
| 16            | 6             | 0           | 0.407457                | 2.328010  | -0.593006 |
| 17            | 16            | 0           | -0.371076               | 3.728447  | -0.736437 |
| 18            | 6             | 0           | -1.642432               | 0.265820  | 1.410789  |
| 19            | 6             | 0           | -1.178958               | -0.793283 | -0.637191 |
| 20            | 6             | 0           | -3.000046               | 0.129207  | 1.204311  |
| 21            | 1             | 0           | -1.199968               | 0.731844  | 2.278830  |
| 22            | 6             | 0           | -2.526995               | -0.958052 | -0.886522 |
| 23            | 1             | 0           | -0.404363               | -1.118085 | -1.313238 |
| 24            | 6             | 0           | -3.460668               | -0.493190 | 0.043635  |
| 25            | 1             | 0           | -3.699600               | 0.500710  | 1.939104  |
| 26            | 1             | 0           | -2.824529               | -1.444197 | -1.803687 |
| 27            | 7             | 0           | -0.771084               | -0.197878 | 0.498651  |
| 28            | 6             | 0           | -4.956128               | -0.634942 | -0.160036 |
| 29            | 6             | 0           | -5.447694               | -1.336869 | -1.393452 |
| 30            | 1             | 0           | -6.535088               | -1.365914 | -1.382997 |
| 31            | 1             | 0           | -5.104598               | -0.815589 | -2.291663 |
| 32            | 1             | 0           | -5.053070               | -2.355904 | -1.436432 |
| 33            | 8             | 0           | -5.707219               | -0.178589 | 0.678853  |

tssfD54.

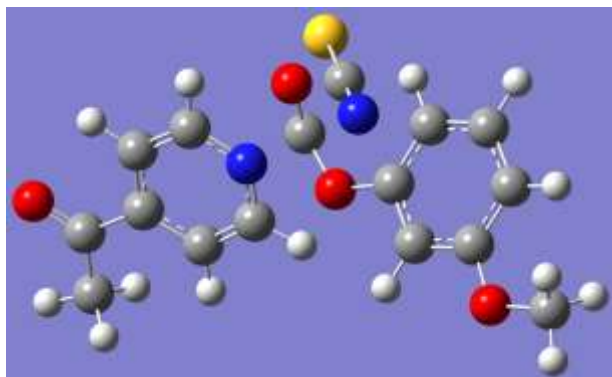

Input orientation:

| Center Number | Atomic Number | Atomic Type | Coordinates (Angstroms) |           |           |
|---------------|---------------|-------------|-------------------------|-----------|-----------|
|               |               |             | X                       | Y         | Z         |
| 1             | 6             | 0           | 0.071042                | 0.537898  | 0.806628  |
| 2             | 8             | 0           | 0.203188                | 1.118394  | 1.864588  |
| 3             | 8             | 0           | 0.915403                | -0.447104 | 0.340377  |
| 4             | 6             | 0           | 2.287079                | -0.248350 | 0.312656  |
| 5             | 6             | 0           | 3.014858                | -1.374770 | -0.046969 |
| 6             | 6             | 0           | 2.914583                | 0.966370  | 0.593704  |
| 7             | 6             | 0           | 4.407342                | -1.300696 | -0.130410 |
| 8             | 1             | 0           | 2.507231                | -2.306002 | -0.262334 |
| 9             | 6             | 0           | 4.302326                | 1.017370  | 0.501274  |
| 10            | 1             | 0           | 2.345585                | 1.836859  | 0.876126  |
| 11            | 6             | 0           | 5.062470                | -0.096037 | 0.145029  |
| 12            | 1             | 0           | 4.807965                | 1.951774  | 0.714516  |
| 13            | 1             | 0           | 6.138096                | -0.015045 | 0.087667  |
| 14            | 7             | 0           | 0.077069                | 1.691809  | -0.568167 |
| 15            | 6             | 0           | -0.739166               | 2.526982  | -0.795825 |
| 16            | 16            | 0           | -1.842396               | 3.650632  | -1.124541 |
| 17            | 6             | 0           | -2.311704               | 0.234042  | 1.403298  |
| 18            | 6             | 0           | -1.583626               | -0.795502 | -0.581560 |
| 19            | 6             | 0           | -3.600033               | -0.214504 | 1.194159  |
| 20            | 1             | 0           | -2.002014               | 0.831327  | 2.248179  |
| 21            | 6             | 0           | -2.856987               | -1.264697 | -0.836027 |
| 22            | 1             | 0           | -0.742423               | -0.974312 | -1.232110 |
| 23            | 6             | 0           | -3.888903               | -0.975240 | 0.061101  |
| 24            | 1             | 0           | -4.378489               | 0.025095  | 1.904036  |
| 25            | 1             | 0           | -3.020527               | -1.846291 | -1.731340 |
| 26            | 7             | 0           | -1.341536               | -0.066680 | 0.523617  |
| 27            | 8             | 0           | 5.037405                | -2.455095 | -0.487495 |
| 28            | 6             | 0           | 6.463282                | -2.443979 | -0.583358 |
| 29            | 1             | 0           | 6.919796                | -2.197877 | 0.379295  |
| 30            | 1             | 0           | 6.747869                | -3.452632 | -0.874445 |
| 31            | 1             | 0           | 6.800855                | -1.734260 | -1.343623 |
| 32            | 6             | 0           | -5.312046               | -1.451546 | -0.150490 |
| 33            | 6             | 0           | -5.639358               | -2.185441 | -1.418951 |
| 34            | 1             | 0           | -6.701338               | -2.420397 | -1.437139 |
| 35            | 1             | 0           | -5.379770               | -1.578237 | -2.290442 |
| 36            | 1             | 0           | -5.060413               | -3.111360 | -1.481827 |
| 37            | 8             | 0           | -6.140146               | -1.222932 | 0.708665  |

tssfD55.

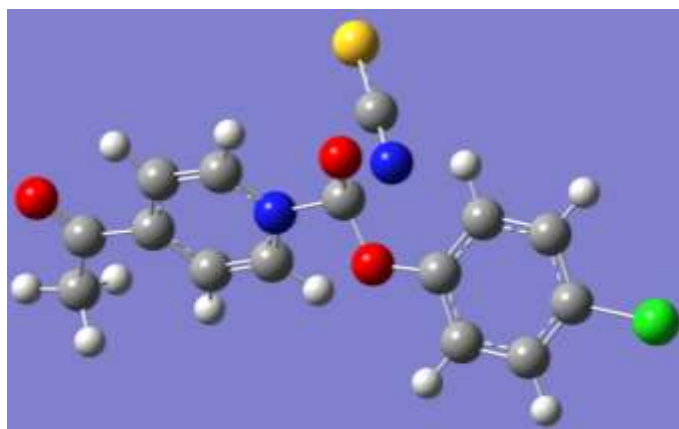

Input orientation:

| Center Number | Atomic Number | Atomic Type | Coordinates (Angstroms) |           |           |
|---------------|---------------|-------------|-------------------------|-----------|-----------|
|               |               |             | X                       | Y         | Z         |
| 1             | 6             | 0           | 0.035985                | 0.232225  | 0.793945  |
| 2             | 8             | 0           | 0.259369                | 0.719645  | 1.882273  |
| 3             | 8             | 0           | 0.753340                | -0.806766 | 0.238069  |
| 4             | 6             | 0           | 2.130342                | -0.738056 | 0.137050  |
| 5             | 6             | 0           | 2.725956                | -1.865823 | -0.425798 |
| 6             | 6             | 0           | 2.900543                | 0.351757  | 0.536504  |
| 7             | 6             | 0           | 4.104338                | -1.912226 | -0.593954 |
| 8             | 1             | 0           | 2.104729                | -2.698182 | -0.730926 |
| 9             | 6             | 0           | 4.283203                | 0.305082  | 0.363673  |
| 10            | 1             | 0           | 2.443029                | 1.222722  | 0.977718  |
| 11            | 6             | 0           | 4.871107                | -0.821339 | -0.196341 |
| 12            | 1             | 0           | 4.572189                | -2.784602 | -1.030230 |
| 13            | 1             | 0           | 4.891787                | 1.146048  | 0.668734  |
| 14            | 7             | 0           | 0.168261                | 1.477426  | -0.513945 |
| 15            | 6             | 0           | -0.493730               | 2.461757  | -0.605528 |
| 16            | 16            | 0           | -1.387823               | 3.792037  | -0.746220 |
| 17            | 6             | 0           | -2.354158               | 0.198609  | 1.413303  |
| 18            | 6             | 0           | -1.778310               | -0.798024 | -0.638795 |
| 19            | 6             | 0           | -3.689467               | -0.077364 | 1.201963  |
| 20            | 1             | 0           | -1.964972               | 0.703978  | 2.284733  |
| 21            | 6             | 0           | -3.101474               | -1.098540 | -0.893060 |
| 22            | 1             | 0           | -0.973026               | -1.038131 | -1.314330 |
| 23            | 6             | 0           | -4.080340               | -0.737704 | 0.036801  |
| 24            | 1             | 0           | -4.425414               | 0.216189  | 1.936467  |
| 25            | 1             | 0           | -3.345538               | -1.606908 | -1.814085 |
| 26            | 7             | 0           | -1.436942               | -0.169020 | 0.501557  |
| 27            | 17            | 0           | 6.621060                | -0.872124 | -0.407285 |
| 28            | 6             | 0           | -5.552746               | -1.031758 | -0.173182 |
| 29            | 6             | 0           | -5.967380               | -1.744126 | -1.428429 |
| 30            | 1             | 0           | -5.680557               | -1.161725 | -2.308703 |
| 31            | 1             | 0           | -5.466437               | -2.713507 | -1.501124 |
| 32            | 1             | 0           | -7.045502               | -1.888751 | -1.422795 |
| 33            | 8             | 0           | -6.346648               | -0.682398 | 0.677402  |

tssfD56.

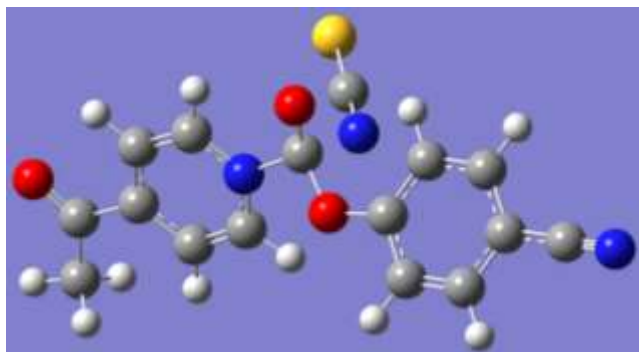

Input orientation:

| Center Number | Atomic Number | Atomic Type | Coordinates (Angstroms) |           |           |
|---------------|---------------|-------------|-------------------------|-----------|-----------|
|               |               |             | X                       | Y         | Z         |
| 1             | 6             | 0           | 0.169439                | 0.196708  | 0.803736  |
| 2             | 8             | 0           | 0.405376                | 0.697332  | 1.880296  |
| 3             | 8             | 0           | 0.885903                | -0.849677 | 0.251044  |
| 4             | 6             | 0           | 2.256163                | -0.796718 | 0.161712  |
| 5             | 6             | 0           | 2.845087                | -1.954165 | -0.352453 |
| 6             | 6             | 0           | 3.030252                | 0.306068  | 0.525133  |
| 7             | 6             | 0           | 4.218802                | -2.016509 | -0.506869 |
| 8             | 1             | 0           | 2.215370                | -2.790312 | -0.626967 |
| 9             | 6             | 0           | 4.408064                | 0.240595  | 0.365970  |
| 10            | 1             | 0           | 2.572460                | 1.195935  | 0.925443  |
| 11            | 6             | 0           | 5.011518                | -0.914958 | -0.147536 |
| 12            | 1             | 0           | 4.680411                | -2.910644 | -0.904561 |
| 13            | 1             | 0           | 5.018467                | 1.090300  | 0.642715  |
| 14            | 7             | 0           | 0.319786                | 1.439723  | -0.541765 |
| 15            | 6             | 0           | -0.349415               | 2.419060  | -0.634302 |
| 16            | 16            | 0           | -1.257848               | 3.740695  | -0.772175 |
| 17            | 6             | 0           | -2.215002               | 0.214359  | 1.410462  |
| 18            | 6             | 0           | -1.642971               | -0.827807 | -0.621920 |
| 19            | 6             | 0           | -3.552950               | -0.042483 | 1.194398  |
| 20            | 1             | 0           | -1.823939               | 0.728101  | 2.275929  |
| 21            | 6             | 0           | -2.969271               | -1.109937 | -0.878701 |
| 22            | 1             | 0           | -0.838627               | -1.092330 | -1.289183 |
| 23            | 6             | 0           | -3.947655               | -0.716284 | 0.038319  |
| 24            | 1             | 0           | -4.288363               | 0.276491  | 1.918747  |
| 25            | 1             | 0           | -3.216136               | -1.629932 | -1.792419 |
| 26            | 7             | 0           | -1.297656               | -0.185068 | 0.510674  |
| 27            | 6             | 0           | 6.427853                | -0.972800 | -0.304120 |
| 28            | 7             | 0           | 7.576530                | -1.020233 | -0.431535 |
| 29            | 6             | 0           | -5.424033               | -0.988668 | -0.175697 |
| 30            | 6             | 0           | -5.843358               | -1.718610 | -1.419023 |
| 31            | 1             | 0           | -5.541539               | -1.158833 | -2.308914 |
| 32            | 1             | 0           | -5.358792               | -2.697677 | -1.469375 |
| 33            | 1             | 0           | -6.923817               | -1.844618 | -1.417155 |
| 34            | 8             | 0           | -6.216177               | -0.608190 | 0.662895  |



tssfD61.

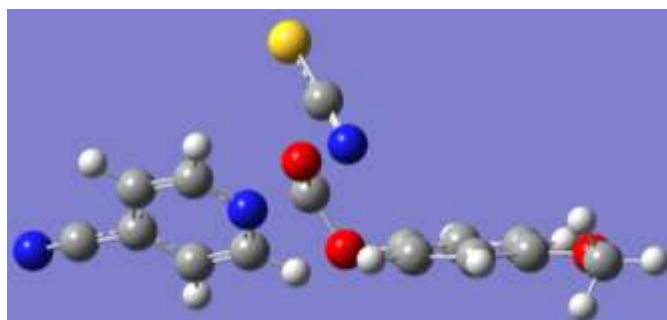

Input orientation:

| Center<br>Number | Atomic<br>Number | Atomic<br>Type | Coordinates (Angstroms) |           |           |
|------------------|------------------|----------------|-------------------------|-----------|-----------|
|                  |                  |                | X                       | Y         | Z         |
| 1                | 6                | 0              | -0.297932               | 0.318062  | 0.298341  |
| 2                | 8                | 0              | -0.020073               | 1.217518  | 1.063847  |
| 3                | 8                | 0              | 0.411344                | -0.860034 | 0.170356  |
| 4                | 6                | 0              | 1.797227                | -0.737715 | 0.027190  |
| 5                | 6                | 0              | 2.351983                | -0.909018 | -1.237962 |
| 6                | 6                | 0              | 2.600883                | -0.515069 | 1.133818  |
| 7                | 6                | 0              | 3.729622                | -0.853522 | -1.392161 |
| 8                | 1                | 0              | 1.703458                | -1.081388 | -2.086593 |
| 9                | 6                | 0              | 3.987419                | -0.456497 | 0.983238  |
| 10               | 1                | 0              | 2.151555                | -0.389865 | 2.109947  |
| 11               | 6                | 0              | 4.554763                | -0.624750 | -0.283397 |
| 12               | 1                | 0              | 4.184309                | -0.986348 | -2.366042 |
| 13               | 1                | 0              | 4.603608                | -0.284753 | 1.854196  |
| 14               | 7                | 0              | -0.332766               | 0.911539  | -1.381450 |
| 15               | 6                | 0              | -1.147370               | 1.640665  | -1.852382 |
| 16               | 16               | 0              | -2.258278               | 2.609485  | -2.494131 |
| 17               | 6                | 0              | -2.654419               | 0.575710  | 1.024740  |
| 18               | 6                | 0              | -2.177160               | -1.279789 | -0.340174 |
| 19               | 6                | 0              | -3.996063               | 0.247041  | 1.063498  |
| 20               | 1                | 0              | -2.226510               | 1.432618  | 1.524534  |
| 21               | 6                | 0              | -3.501435               | -1.664299 | -0.336949 |
| 22               | 1                | 0              | -1.405716               | -1.815008 | -0.870281 |
| 23               | 6                | 0              | -4.425622               | -0.890118 | 0.374996  |
| 24               | 1                | 0              | -4.685346               | 0.865949  | 1.618728  |
| 25               | 1                | 0              | -3.805119               | -2.546674 | -0.880686 |
| 26               | 7                | 0              | -1.787981               | -0.184745 | 0.339383  |
| 27               | 8                | 0              | 5.894014                | -0.587419 | -0.535697 |
| 28               | 6                | 0              | 6.782009                | -0.364609 | 0.560934  |
| 29               | 1                | 0              | 6.692709                | -1.159600 | 1.306666  |
| 30               | 1                | 0              | 7.783939                | -0.373016 | 0.137648  |
| 31               | 1                | 0              | 6.591165                | 0.604249  | 1.030969  |
| 32               | 6                | 0              | -5.807187               | -1.261331 | 0.391550  |
| 33               | 7                | 0              | -6.920970               | -1.560780 | 0.404363  |

tssfD62.

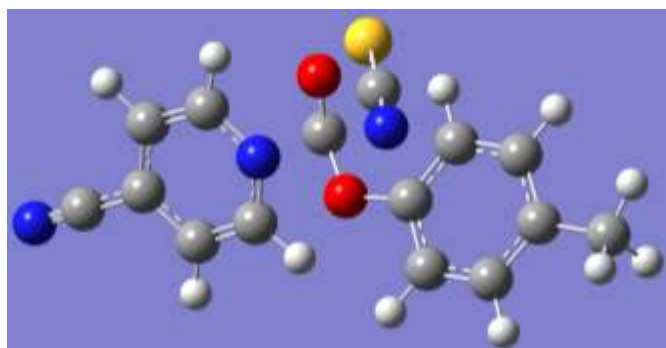

Input orientation:

| Center Number | Atomic Number | Atomic Type | Coordinates (Angstroms) |           |           |
|---------------|---------------|-------------|-------------------------|-----------|-----------|
|               |               |             | X                       | Y         | Z         |
| 1             | 6             | 0           | -0.000470               | 0.038031  | 0.815171  |
| 2             | 8             | 0           | 0.154536                | 0.480103  | 1.934087  |
| 3             | 8             | 0           | 0.748533                | -0.958283 | 0.244173  |
| 4             | 6             | 0           | 2.132071                | -0.850360 | 0.162909  |
| 5             | 6             | 0           | 2.755968                | -1.896138 | -0.514451 |
| 6             | 6             | 0           | 2.877495                | 0.196162  | 0.694403  |
| 7             | 6             | 0           | 4.137705                | -1.892099 | -0.658877 |
| 8             | 1             | 0           | 2.152830                | -2.699571 | -0.919223 |
| 9             | 6             | 0           | 4.264149                | 0.181807  | 0.531730  |
| 10            | 1             | 0           | 2.398295                | 1.002450  | 1.227388  |
| 11            | 6             | 0           | 4.919252                | -0.850978 | -0.141223 |
| 12            | 1             | 0           | 4.615664                | -2.711538 | -1.184681 |
| 13            | 1             | 0           | 4.843405                | 0.998889  | 0.947714  |
| 14            | 7             | 0           | 0.143890                | 1.345822  | -0.422358 |
| 15            | 6             | 0           | -0.572530               | 2.291768  | -0.511926 |
| 16            | 16            | 0           | -1.544851               | 3.566210  | -0.645835 |
| 17            | 6             | 0           | -2.427816               | -0.023181 | 1.307239  |
| 18            | 6             | 0           | -1.745432               | -0.995622 | -0.723669 |
| 19            | 6             | 0           | -3.754274               | -0.295039 | 1.032214  |
| 20            | 1             | 0           | -2.085567               | 0.472023  | 2.204232  |
| 21            | 6             | 0           | -3.049195               | -1.298303 | -1.054810 |
| 22            | 1             | 0           | -0.904631               | -1.226996 | -1.357824 |
| 23            | 6             | 0           | -4.069964               | -0.944044 | -0.163948 |
| 24            | 1             | 0           | -4.519127               | -0.006222 | 1.737955  |
| 25            | 1             | 0           | -3.263613               | -1.797105 | -1.988529 |
| 26            | 7             | 0           | -1.467801               | -0.378620 | 0.440556  |
| 27            | 6             | 0           | 6.415928                | -0.842737 | -0.325139 |
| 28            | 1             | 0           | 6.843622                | -1.830871 | -0.138196 |
| 29            | 1             | 0           | 6.683401                | -0.561514 | -1.348940 |
| 30            | 1             | 0           | 6.893330                | -0.130212 | 0.349846  |
| 31            | 6             | 0           | -5.432813               | -1.242413 | -0.481186 |
| 32            | 7             | 0           | -6.531342               | -1.483066 | -0.737344 |

tssfD63.

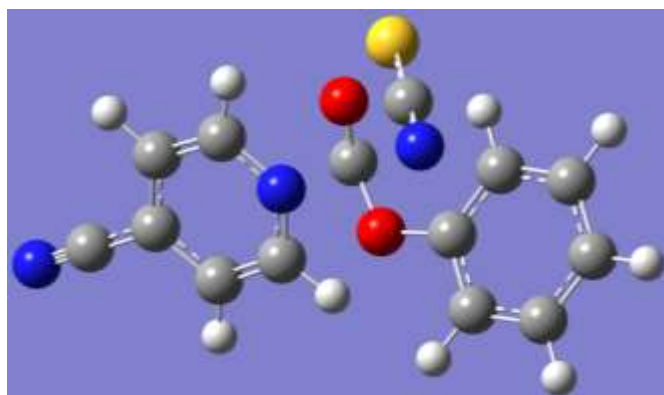

Input orientation:

| Center<br>Number | Atomic<br>Number | Atomic<br>Type | Coordinates (Angstroms) |           |           |
|------------------|------------------|----------------|-------------------------|-----------|-----------|
|                  |                  |                | X                       | Y         | Z         |
| 1                | 6                | 0              | 0.374784                | -0.003982 | 0.747596  |
| 2                | 8                | 0              | 0.594349                | 0.439432  | 1.854370  |
| 3                | 8                | 0              | 1.049271                | -1.045534 | 0.161722  |
| 4                | 6                | 0              | 2.433923                | -1.033328 | 0.064093  |
| 5                | 6                | 0              | 2.975921                | -2.158129 | -0.555564 |
| 6                | 6                | 0              | 3.247383                | 0.000313  | 0.521543  |
| 7                | 6                | 0              | 4.353966                | -2.251693 | -0.718810 |
| 8                | 1                | 0              | 2.313194                | -2.941169 | -0.902484 |
| 9                | 6                | 0              | 4.627735                | -0.108551 | 0.345237  |
| 10               | 1                | 0              | 2.822237                | 0.865684  | 1.004914  |
| 11               | 6                | 0              | 5.187169                | -1.226105 | -0.269434 |
| 12               | 1                | 0              | 4.774892                | -3.126428 | -1.200034 |
| 13               | 1                | 0              | 5.265474                | 0.693478  | 0.697815  |
| 14               | 1                | 0              | 6.260247                | -1.298911 | -0.397378 |
| 15               | 7                | 0              | 0.550266                | 1.285236  | -0.514134 |
| 16               | 6                | 0              | -0.108293               | 2.274515  | -0.576791 |
| 17               | 16               | 0              | -1.003833               | 3.607203  | -0.673148 |
| 18               | 6                | 0              | -2.031360               | 0.080883  | 1.317800  |
| 19               | 6                | 0              | -1.472375               | -0.952517 | -0.721244 |
| 20               | 6                | 0              | -3.379195               | -0.119541 | 1.090012  |
| 21               | 1                | 0              | -1.632460               | 0.566520  | 2.196363  |
| 22               | 6                | 0              | -2.801261               | -1.185580 | -1.005023 |
| 23               | 1                | 0              | -0.667702               | -1.237894 | -1.379744 |
| 24               | 6                | 0              | -3.770281               | -0.765010 | -0.085600 |
| 25               | 1                | 0              | -4.102622               | 0.219905  | 1.816519  |
| 26               | 1                | 0              | -3.074282               | -1.682741 | -1.924188 |
| 27               | 7                | 0              | -1.121978               | -0.338497 | 0.425071  |
| 28               | 6                | 0              | -5.157486               | -0.991745 | -0.352678 |
| 29               | 7                | 0              | -6.275661               | -1.174727 | -0.568268 |

tssfD64.

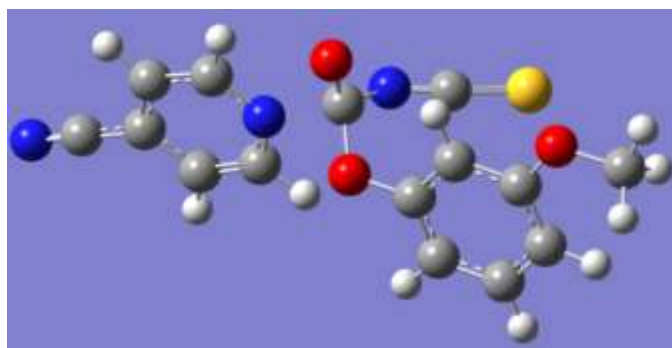

Input orientation:

| Center Number | Atomic Number | Atomic Type | Coordinates (Angstroms) |           |           |
|---------------|---------------|-------------|-------------------------|-----------|-----------|
|               |               |             | X                       | Y         | Z         |
| 1             | 6             | 0           | -0.365140               | 0.202720  | 0.963750  |
| 2             | 8             | 0           | -0.347428               | 0.193076  | 2.180905  |
| 3             | 8             | 0           | 0.323700                | -0.771271 | 0.195525  |
| 4             | 6             | 0           | 1.644978                | -0.482676 | -0.121539 |
| 5             | 6             | 0           | 2.538406                | -0.038825 | 0.842882  |
| 6             | 6             | 0           | 2.032616                | -0.666492 | -1.448401 |
| 7             | 6             | 0           | 3.852801                | 0.260836  | 0.467835  |
| 8             | 1             | 0           | 2.228472                | 0.098110  | 1.869697  |
| 9             | 6             | 0           | 3.346545                | -0.383702 | -1.798493 |
| 10            | 1             | 0           | 1.308693                | -1.007718 | -2.176501 |
| 11            | 6             | 0           | 4.263505                | 0.088435  | -0.857057 |
| 12            | 1             | 0           | 3.666815                | -0.515919 | -2.825054 |
| 13            | 1             | 0           | 5.274958                | 0.312517  | -1.163484 |
| 14            | 7             | 0           | -0.346804               | 1.483465  | 0.256606  |
| 15            | 6             | 0           | 0.484478                | 2.245920  | -0.150393 |
| 16            | 16            | 0           | 1.478040                | 3.341385  | -0.713844 |
| 17            | 6             | 0           | -2.929780               | -0.589028 | 1.375983  |
| 18            | 6             | 0           | -2.363797               | -0.500364 | -0.881008 |
| 19            | 6             | 0           | -4.222138               | -1.000537 | 1.084764  |
| 20            | 1             | 0           | -2.566910               | -0.438698 | 2.385912  |
| 21            | 6             | 0           | -3.631067               | -0.907234 | -1.262668 |
| 22            | 1             | 0           | -1.583049               | -0.288857 | -1.599133 |
| 23            | 6             | 0           | -4.573720               | -1.160763 | -0.258665 |
| 24            | 1             | 0           | -4.930280               | -1.189673 | 1.878686  |
| 25            | 1             | 0           | -3.877304               | -1.024776 | -2.308208 |
| 26            | 7             | 0           | -2.048883               | -0.352990 | 0.408070  |
| 27            | 8             | 0           | 4.657016                | 0.713694  | 1.468861  |
| 28            | 6             | 0           | 6.014046                | 1.034268  | 1.154270  |
| 29            | 1             | 0           | 6.066033                | 1.835757  | 0.412498  |
| 30            | 1             | 0           | 6.461950                | 1.370544  | 2.086601  |
| 31            | 1             | 0           | 6.549841                | 0.155022  | 0.786236  |
| 32            | 6             | 0           | -5.895529               | -1.584735 | -0.608700 |
| 33            | 7             | 0           | -6.960849               | -1.926524 | -0.890777 |

tssfD65.

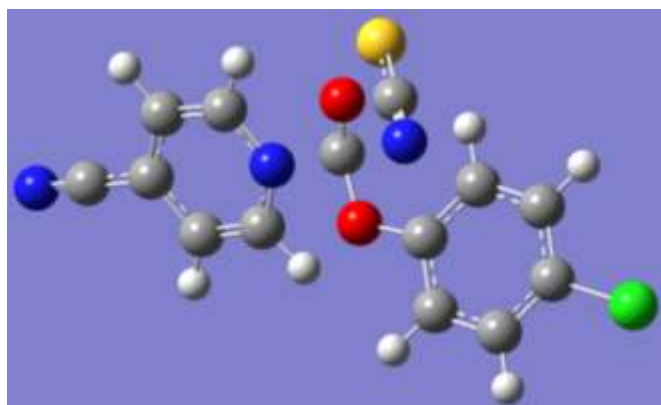

Input orientation:

| Center<br>Number | Atomic<br>Number | Atomic<br>Type | Coordinates (Angstroms) |           |           |
|------------------|------------------|----------------|-------------------------|-----------|-----------|
|                  |                  |                | X                       | Y         | Z         |
| 1                | 6                | 0              | -0.318291               | 0.095047  | 0.789685  |
| 2                | 8                | 0              | -0.149775               | 0.545811  | 1.901859  |
| 3                | 8                | 0              | 0.460917                | -0.872909 | 0.201360  |
| 4                | 6                | 0              | 1.834655                | -0.724553 | 0.122946  |
| 5                | 6                | 0              | 2.494930                | -1.781067 | -0.501497 |
| 6                | 6                | 0              | 2.539089                | 0.376785  | 0.602435  |
| 7                | 6                | 0              | 3.875727                | -1.743576 | -0.651407 |
| 8                | 1                | 0              | 1.922509                | -2.623577 | -0.867917 |
| 9                | 6                | 0              | 3.924057                | 0.414660  | 0.447156  |
| 10               | 1                | 0              | 2.029669                | 1.191929  | 1.091074  |
| 11               | 6                | 0              | 4.577828                | -0.641002 | -0.174382 |
| 12               | 1                | 0              | 4.394965                | -2.560230 | -1.134814 |
| 13               | 1                | 0              | 4.483160                | 1.265257  | 0.813687  |
| 14               | 7                | 0              | -0.238079               | 1.412122  | -0.459419 |
| 15               | 6                | 0              | -1.052649               | 2.272498  | -0.576423 |
| 16               | 16               | 0              | -2.167553               | 3.419151  | -0.740985 |
| 17               | 6                | 0              | -2.728893               | -0.020712 | 1.315429  |
| 18               | 6                | 0              | -2.046131               | -1.016694 | -0.705251 |
| 19               | 6                | 0              | -4.051141               | -0.329071 | 1.060577  |
| 20               | 1                | 0              | -2.389620               | 0.500049  | 2.198816  |
| 21               | 6                | 0              | -3.345862               | -1.356064 | -1.014482 |
| 22               | 1                | 0              | -1.208227               | -1.239710 | -1.345985 |
| 23               | 6                | 0              | -4.364830               | -1.008536 | -0.118879 |
| 24               | 1                | 0              | -4.814613               | -0.043741 | 1.769193  |
| 25               | 1                | 0              | -3.558600               | -1.877787 | -1.935966 |
| 26               | 7                | 0              | -1.769583               | -0.370870 | 0.444497  |
| 27               | 17               | 0              | 6.329816                | -0.584964 | -0.362382 |
| 28               | 6                | 0              | -5.723676               | -1.343752 | -0.415152 |
| 29               | 7                | 0              | -6.819082               | -1.613947 | -0.654613 |

tssfD66.

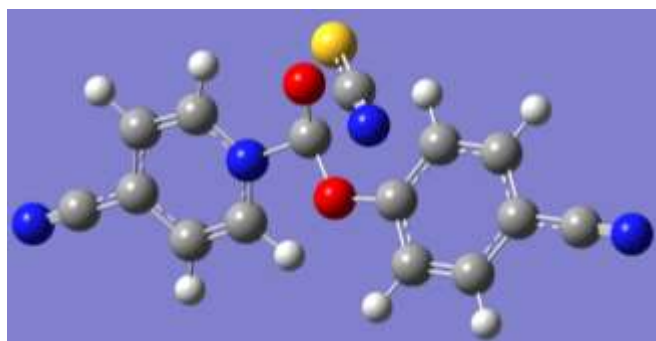

Input orientation:

| Center Number | Atomic Number | Atomic Type | Coordinates (Angstroms) |           |           |
|---------------|---------------|-------------|-------------------------|-----------|-----------|
|               |               |             | X                       | Y         | Z         |
| 1             | 6             | 0           | -0.184716               | 0.065500  | 0.790713  |
| 2             | 8             | 0           | 0.002158                | 0.497108  | 1.904916  |
| 3             | 8             | 0           | 0.590548                | -0.893287 | 0.173009  |
| 4             | 6             | 0           | 1.959187                | -0.767247 | 0.113741  |
| 5             | 6             | 0           | 2.611451                | -1.852712 | -0.474270 |
| 6             | 6             | 0           | 2.670131                | 0.341279  | 0.573711  |
| 7             | 6             | 0           | 3.988896                | -1.836518 | -0.606185 |
| 8             | 1             | 0           | 2.028131                | -2.695014 | -0.822423 |
| 9             | 6             | 0           | 4.051927                | 0.355011  | 0.436415  |
| 10            | 1             | 0           | 2.161636                | 1.174776  | 1.030384  |
| 11            | 6             | 0           | 4.719680                | -0.727901 | -0.150402 |
| 12            | 1             | 0           | 4.500622                | -2.674534 | -1.060619 |
| 13            | 1             | 0           | 4.615142                | 1.209820  | 0.787389  |
| 14            | 7             | 0           | -0.094268               | 1.419259  | -0.454429 |
| 15            | 6             | 0           | -0.911325               | 2.281865  | -0.531667 |
| 16            | 16            | 0           | -2.034819               | 3.427648  | -0.636514 |
| 17            | 6             | 0           | -2.586780               | -0.022708 | 1.319545  |
| 18            | 6             | 0           | -1.919210               | -0.996056 | -0.719019 |
| 19            | 6             | 0           | -3.912635               | -0.311013 | 1.061627  |
| 20            | 1             | 0           | -2.241020               | 0.479711  | 2.210794  |
| 21            | 6             | 0           | -3.223350               | -1.314025 | -1.030354 |
| 22            | 1             | 0           | -1.086183               | -1.219058 | -1.365853 |
| 23            | 6             | 0           | -4.236589               | -0.968600 | -0.127315 |
| 24            | 1             | 0           | -4.671139               | -0.027119 | 1.776089  |
| 25            | 1             | 0           | -3.443878               | -1.818349 | -1.959633 |
| 26            | 7             | 0           | -1.632318               | -0.372162 | 0.441406  |
| 27            | 6             | 0           | 6.139487                | -0.704468 | -0.284430 |
| 28            | 7             | 0           | 7.290785                | -0.685789 | -0.393709 |
| 29            | 6             | 0           | -5.599716               | -1.283510 | -0.425751 |
| 30            | 7             | 0           | -6.698591               | -1.537552 | -0.666883 |
